# Supplementary material for: FOXA1/MND1/TKT axis regulates gastric cancer progression and oxaliplatin sensitivity via PI3K/AKT signaling pathway
Source: Springer Nature journal article supplement (doi:10.1186/s12935-023-03077-4), 2023-10-10
Supplement: MOESM1 [file 26147972]

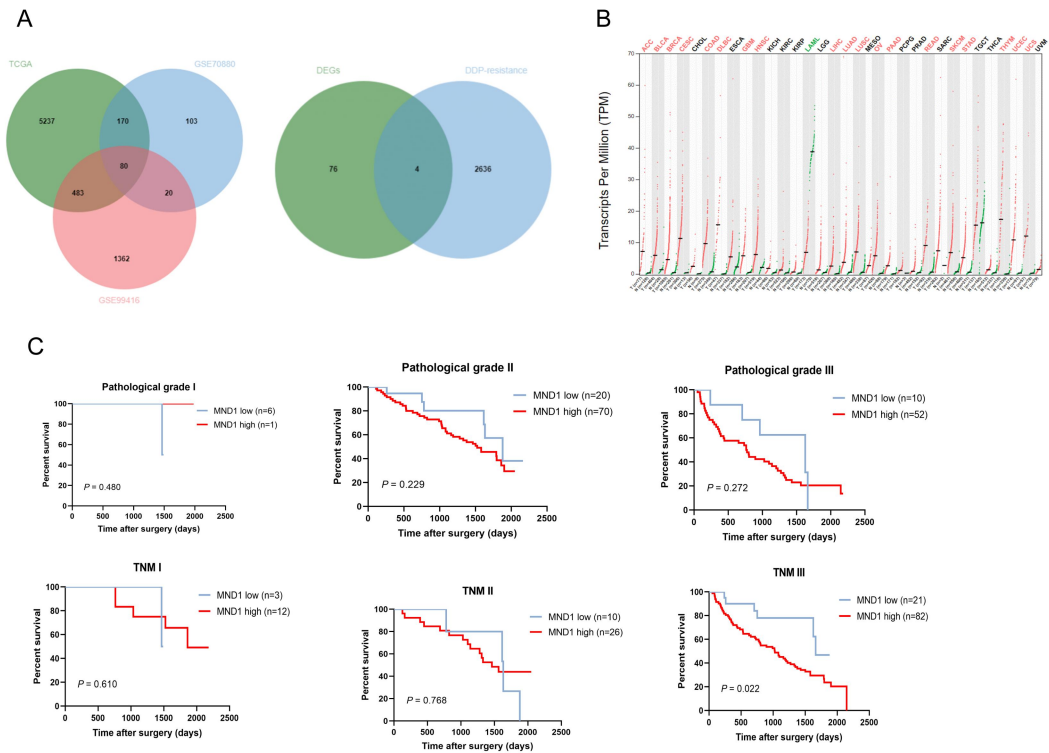

**Supplementary Figure 1.** MND1 expression and subgroup survival analysis in various cancers. **A.** Intersection of differential genes of TCGA, GSE70880 and GSE99416 on the left. Intersection of differential genes and DDP- drug resistance (GSE122130) on the right; **B.** Based on the TCGA database, the expression of MND1 in various cancer types was detected (Green is the adjacent tissue and red is the cancerous tissue); **C.** OS prognosis of different MND1 expression in pathological stage and TNM stage in 159 GC patients.

Adjacent normal tissue

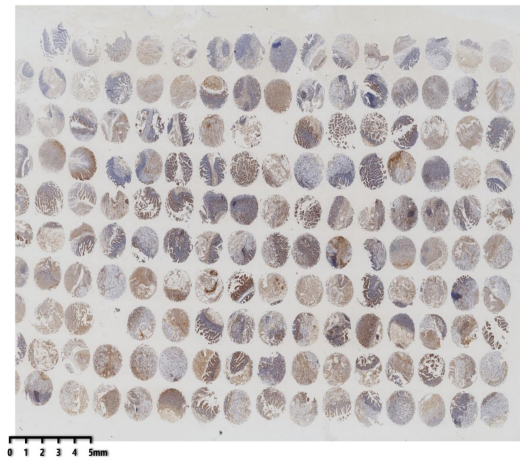

Tumor

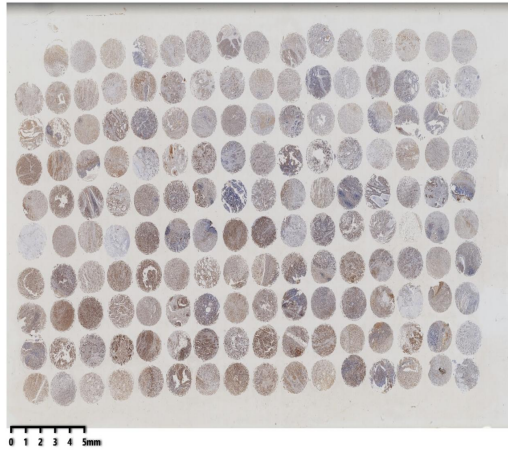

**Supplementary Figure 2.** IHC staining of MND1 in cancer and adjacent normal cancer based on tissue microarray.
