# Supplementary material for: FOXA1/MND1/TKT axis regulates gastric cancer progression and oxaliplatin sensitivity via PI3K/AKT signaling pathway
Source: Cancer Cell Int. 2023 Oct 10;23:234. doi: 10.1186/s12935-023-03077-4 (PMC10566187; doi:10.1186/s12935-023-03077-4)
Supplement: Supplementary file 2 — Additional file 2: Table S1. Up-regulated gene sets of TCGA, GSE70880 and GSE99416. [file 12935_2023_3077_MOESM2_ESM.xls]

## Sheet: Sheet1
Supplementary Table 1 Up-regulated gene sets of TCGA, GSE70880 and GSE99416
TCGA			GSE70880			GSE99416
logFC	AveExpr	P.Value	logFC	AveExpr	P.Value	logFC	AveExpr	P.Value
MIR4435-2HG	2.61898	18.2168	HOXC11	2.13449	7.55461	CLDN7	4.48904	45.3372
ESM1	4.99682	17.5277	WTAPP1	2.88634	7.17044	AC003688.1	4.48904	45.3372
MTHFD1L	2.47087	16.875	MMP1	2.88634	7.17044	NR5A2	3.82663	37.0395
CLSPN	3.27956	16.4917	HIST2H4B	1.12966	6.95846	CLDN4	5.93753	28.8404
KIF14	3.60094	16.1723	HIST2H4A	1.12966	6.95846	CEACAM5	3.8712	23.3201
NFE2L3	2.97831	16.134	ENO1	1.0584	6.87189	AC243967.1	3.8712	23.3201
ECT2	3.05239	15.3106	HIST1H4F	1.22917	6.76004	CEACAM1	3.43786	22.0185
CEP55	3.25681	15.3026	AL138733.1	1.47523	6.52808	AL135924.2	4.71185	21.0825
FOXD2-AS1	3.12217	15.2608	HIST2H2BF	1.00862	6.45492	GPRC5D	5.49007	21.0047
ACAN	4.34801	15.2544	HIST2H2BE	1.00862	6.45492	LINC02537	2.19671	19.2746
HELLS	2.73246	15.2526	HIST2H2BA	1.00862	6.45492	AL157371.1	2.19671	19.2746
KIF18B	3.61443	15.2355	CHEK2P4	1.04829	6.37533	SEPTIN9-DT	4.07116	18.8781
STIL	3.04647	15.1016	AC134879.3	1.04829	6.37533	AC068594.1	4.07116	18.8781
KIF23	3.01723	15.0628	PLK1	1.32274	6.36584	HIST1H2BH	2.32562	18.3242
INHBA	4.21288	15.0623	ANLN	1.79051	6.36121	AC124067.2	2.37551	18.1678
IQGAP3	3.29972	15.0558	TNFRSF12A	1.8064	6.34607	S100A10	3.25403	17.4958
ZWILCH	2.09138	14.9744	CKS2	1.47059	6.32665	LINC01529	2.10574	17.3439
ASPM	3.46406	14.9207	SLC2A1	1.30523	6.2722	ARHGAP33	2.10574	17.3439
SOX9	3.11213	14.8961	MKI67	1.59853	6.24198	TLCD2	3.08583	16.1021
TPX2	3.35744	14.8921	CLDN1	2.57901	6.22747	MXD1	2.25361	15.6927
HJURP	3.40858	14.8564	CDK1	1.65992	6.2234	CST1	3.30755	15.4104
EXO1	3.24843	14.7772	HIST1H3J	1.00408	6.16695	ABHD11	3.49126	15.1724
BUB1	3.22687	14.7538	FANCB	1.52425	6.09514	FAM83B	2.70001	14.7185
CDK1	3.02763	14.7464	MAD2L1	1.27524	6.09089	AL049555.1	2.70001	14.7185
NEK2	3.38001	14.7082	HIST1H3G	1.02655	6.08505	SERPINB1	4.06242	14.5263
SGO1	2.97831	14.7038	HIST1H3F	1.0138	6.08052	FCHO2	2.95696	14.3327
KNOP1	1.57809	14.6952	KIF23	1.60097	6.07016	TRIM15	4.82207	14.1184
BUB1B	3.1785	14.6897	HMGA1P3	1.1457	6.06097	GPRC5A	4.31606	14.1139
DTL	2.96706	14.6652	CLSPN	2.03089	6.06071	TNFRSF10B	1.97026	14.0553
CST1	7.40279	14.6686	TRIP13	1.87296	6.05794	RAB22A	1.75635	13.9906
RUNX1	2.30511	14.6523	RAD51AP1	1.12842	6.05651	VSNL1	3.60317	13.9374
NUF2	3.0742	14.6195	RAD54L	1.47332	6.05527	AC124798.1	3.41279	13.8953
MKI67	3.37734	14.6108	MCM4	1.19623	6.03323	REG4	7.49073	13.6908
CENPF	3.34067	14.5918	CENPO	1.01948	6.03192	CYP4F30P	2.49883	13.6722
ARHGAP11A	2.78138	14.5516	ADCY3	1.01948	6.03192	LINC02433	1.88048	13.6366
MARCKSL1	2.35515	14.5389	CKAP2	1.40353	6.00887	AGR3	4.49034	13.211
DKC1	1.83556	14.5076	STIL	1.28641	5.98889	CLRN3	5.97337	13.1836
TRIM59	2.12208	14.476	PCNA	1.06411	5.96796	GRAMD1B	1.15215	13.1691
RAD51AP1	2.69886	14.4313	EXO1	1.14613	5.91582	CD55	3.02917	13.1125
OSBPL3	2.12136	14.411	HIST1H3H	1.09084	5.85574	STAP2	2.36268	12.9188
KIF20A	3.13111	14.3559	ASPM	1.7396	5.82256	TM4SF20	6.87038	12.7275
TROAP	3.14161	14.3461	PMCH	1.22574	5.80011	MCF2L2	2.75312	12.5868
MELK	3.14122	14.2868	NEK2	2.01368	5.79811	B3GNT5	2.75312	12.5868
DBF4	2.17539	14.2616	NEK2P4	1.88638	5.78977	TWF1	1.53533	12.564
EME1	2.82224	14.2579	DGKH	1.0644	5.78964	GDA	4.30569	12.544
HMMR	3.12088	14.243	CCNF	1.53552	5.76084	CLDN1	5.12434	12.4776
OTX1	3.6056	14.2385	AC106820.5	1.53552	5.76084	TMPRSS4	1.80577	12.4747
ANLN	2.85534	14.2347	ETV4	1.80792	5.75389	PAWR	1.30138	12.452
CENPK	2.48228	14.2177	NCAPG2	1.0646	5.74612	MARVELD3	4.03333	12.3115
KIF11	2.62421	14.2161	SPP1	3.14847	5.71927	MGST2	1.65505	12.1365
AC026369.2	3.22699	14.2254	AC131944.1	3.14847	5.71927	AL353807.5	2.96105	12.105
SKA3	3.04764	14.2005	LPCAT1	1.33828	5.71919	AL353807.3	2.96105	12.105
TRIP13	2.9273	14.1752	HJURP	1.41298	5.70891	RDH16	1.88797	12.1041
E2F3	1.92509	14.1677	STRIP2	1.04793	5.6927	SLC19A3	3.24917	12.0958
RCC2	2.00497	14.1411	URB2	1.00877	5.68048	MUC13	5.96587	12.055
NOP2	1.74928	14.1401	UPP1	1.1619	5.67325	SERPINB5	5.82882	12.0466
MCM10	3.28958	14.136	MCM6	1.00396	5.66533	XKR9	4.89087	11.9404
KIF18A	2.97993	14.1245	CST2	3.24458	5.66104	AC015687.1	4.89087	11.9404
DLGAP5	3.12182	14.0026	C2orf81	1.0363	5.64517	KRT7	3.71863	11.9145
MTFR2	2.77907	13.9835	AC005041.1	1.0363	5.64517	UCA1	5.081	11.727
SLC12A8	2.38943	13.9703	MELK	1.69662	5.63537	LINC01764	5.081	11.727
GABRD	3.28498	13.9427	PLA2G7	2.10963	5.62916	PSMG4	1.26401	11.6595
BRCA2	2.69051	13.928	PBK	1.33755	5.62387	NCAM1-AS1	1.57587	11.6052
CENPO	2.03643	13.9133	HPSE	1.16958	5.61441	UBE2R2-AS1	3.98722	11.4885
FANCI	2.54741	13.9052	NDC80	1.63765	5.51991	PRSS3	3.98722	11.4885
CKAP2L	2.83636	13.9024	SUCNR1	1.92023	5.519	HSPA4L	1.62913	11.4733
CBX3	1.5123	13.8999	CDKN3	1.37265	5.50539	AC093591.2	1.62913	11.4733
NDC80	2.63409	13.8887	DEPDC1B	1.37218	5.43547	ERRFI1	2.05032	11.4631
TEAD4	2.06216	13.8766	SLC43A2	1.08554	5.43045	PRELID3B	2.21724	11.4482
XRCC2	2.76884	13.8609	TRIM29	2.42508	5.42654	MMP1	4.444	11.4329
CENPL	1.86218	13.8552	AURKA	1.42172	5.42497	GK-IT1	3.09437	11.3219
ENC1	2.73275	13.8523	ARHGAP11B	1.18782	5.37897	CD2AP	2.22785	11.3109
CIP2A	2.32826	13.8401	ARHGAP11A	1.18782	5.37897	PPP2R2D	1.29748	11.309
MTBP	2.40584	13.8263	AC123768.5	1.18782	5.37897	TRIM14	1.6894	11.2652
MYBL2	3.5471	13.8126	AC091057.6	1.18782	5.37897	HS3ST1	1.91266	11.2231
AC012073.1	2.47365	13.7959	CENPW	1.04537	5.37766	JCAD	1.92868	11.1735
PKMYT1	3.17057	13.7917	PLAUR	1.43591	5.37631	MRRF	1.08479	11.0935
NUSAP1	2.62581	13.7541	CDC45	1.35293	5.37258	MYC	1.86848	11.0709
PIGW	1.8391	13.7512	KIF2C	1.16187	5.36652	BHLHE40-AS1	1.98638	11.0174
FAM72A	2.71937	13.6957	AL592166.1	1.16187	5.36652	BHLHE40	1.98638	11.0174
KIF4A	3.02522	13.6916	TICRR	1.3092	5.33015	AP000547.3	1.76849	10.9204
ATAD2	2.50208	13.6807	KIF7	1.3092	5.33015	SGO1-AS1	1.40518	10.809
WDR89	1.22754	13.6585	ATP11A	1.26755	5.30392	H1F0	1.32337	10.7867
GTSE1	3.01046	13.6441	ARPC1B	1.04794	5.3022	C15orf48	3.18511	10.7647
GINS1	2.69056	13.6391	UBE2T	1.27862	5.27918	AC025580.1	3.18511	10.7647
BLM	2.63246	13.6375	KIF4A	1.73269	5.26793	AC019118.2	1.4046	10.7194
GPATCH4	1.51843	13.6347	MTHFD1L	1.13852	5.26376	AC010624.5	3.45457	10.7044
TOP2A	3.34735	13.6198	PCLAF	1.26727	5.24705	LINC02535	2.12272	10.6989
CTHRC1	3.76306	13.5852	AC087632.2	1.26727	5.24705	AC012494.1	3.46221	10.6458
PGM2L1	2.19948	13.5847	PTTG1	1.00104	5.24676	HDHD3	2.09889	10.6452
EZH2	2.39975	13.5789	CHEK1	1.1193	5.2387	TPBG	1.42292	10.595
UBE2T	2.51317	13.5774	HIST1H4L	1.11755	5.22927	S100A6	1.87137	10.5765
DEPDC1B	2.94069	13.5674	CENPI	1.26193	5.21519	CTAGE6	2.08365	10.5704
CDCA2	3.25536	13.5451	TPX2	1.47804	5.20431	CTAGE15	2.08365	10.5704
UBE2C	3.34089	13.5355	KIF14	1.60206	5.20302	AC005840.2	2.54245	10.4475
BID	1.7124	13.5234	PIK3AP1	1.32008	5.1979	AC093627.4	1.78969	10.3467
SHCBP1	2.50346	13.5194	FOXD2-AS1	1.05393	5.19505	TRPM2	2.13907	10.3465
FOXM1	3.01743	13.5174	NT5DC4	1.78823	5.1687	PPIAL4G	1.01605	10.3045
ARHGAP8	2.92867	13.5161	CKAP2L	1.78823	5.1687	LINC01138	1.01605	10.3045
DSCC1	2.40128	13.5052	ITGAE	1.47232	5.16422	FHIT	1.01605	10.3045
RAD51	2.30993	13.5032	HASPIN	1.47232	5.16422	PRSS21	4.00887	10.1916
NOP58	1.52055	13.5001	CLDN4	2.33049	5.15863	SELENOI	1.69927	10.1524
DDIAS	2.87808	13.4552	MYB	1.24171	5.15815	KRTCAP3	1.48834	10.0965
ORC6	2.57957	13.4343	S100A10	1.26443	5.15174	AC007906.2	3.36674	10.057
UTP18	1.40329	13.4133	KNL1	1.58796	5.13244	SEMA4B	2.21334	10.0386
PRR11	2.36609	13.3502	SLC39A8	1.14897	5.13209	NCOR2	3.46481	9.94827
RFC3	2.24914	13.349	CEP55	1.81411	5.12176	MORF4L2	2.40819	9.91346
FANCD2	2.36756	13.3478	FOXD2	1.04472	5.09781	SRRM1	1.33186	9.90954
HOXC-AS2	4.85921	13.3846	HOXB2	1.2063	5.08705	OR2A9P	1.32924	9.86803
PACC1	1.69078	13.3229	FBXO5	1.01876	5.0802	OR2A20P	1.32924	9.86803
PCLAF	2.76375	13.3201	GJB4	1.76518	5.06659	F2RL1	1.62136	9.82823
POLQ	3.15083	13.3189	MND1	1.00789	5.06175	ZNF562	1.60345	9.77733
COL10A1	6.4849	13.3196	PRC1	1.21403	5.0456	AL133371.3	2.4014	9.76274
ADPGK	1.44084	13.2955	HOXA10-AS	2.38491	5.03923	LMO7	3.09484	9.74334
BRIP1	2.53029	13.2897	CENPE	1.31873	5.00641	DHRS9	5.01215	9.73583
ATAD5	2.1658	13.2829	TOP2A	1.50667	5.0047	AC096751.2	2.58976	9.7115
KNTC1	2.17423	13.2584	STMN1	1.06623	4.99592	LINC00501	3.81649	9.65818
PRIM2	1.65383	13.2563	CST1	2.24225	4.99231	BANF1	1.16452	9.58675
NCAPG	2.94372	13.2554	SGO1	1.28462	4.96423	PLAUR	2.60025	9.55358
CFAP157	2.01271	13.2442	HOXD1	1.32444	4.93338	AL365203.2	1.80381	9.43554
EML4	1.62901	13.2435	RNFT2	1.29713	4.92891	UBQLN2	1.54957	9.42919
CDCA5	2.88619	13.2397	CENPM	1.21014	4.90106	AC113208.5	1.50474	9.42372
RIPK2	1.82079	13.2335	PIF1	1.32999	4.89677	IQANK1	1.30391	9.39699
TGIF1	1.60018	13.2249	LINC02577	1.15252	4.88763	AC105219.4	1.30391	9.39699
SOX4	2.3767	13.2224	DEPDC1	1.26873	4.86929	LRTOMT	1.42124	9.39396
MTHFD2	1.90955	13.2212	UBE2C	1.00721	4.86417	LAMTOR1	1.42124	9.39396
WDR43	1.48825	13.2134	NT5DC2	1.13997	4.85396	AP000812.5	1.42124	9.39396
ZWINT	2.4797	13.2123	DNAJC16	1.37121	4.85013	FOXD2-AS1	1.39571	9.3707
CDCA8	2.69751	13.2103	AGMAT	1.37121	4.85013	CYP4F62P	3.50602	9.36031
SDS	3.45024	13.21	GJB2	1.45874	4.82959	RNF186	4.39625	9.3516
HNRNPA1P21	2.72474	13.2081	Z84466.1	1.32553	4.82777	AL009178.3	2.78097	9.34014
GEN1	2.09037	13.1703	TIMP1	1.32553	4.82777	AFDN-DT	2.78097	9.34014
PARPBP	2.34627	13.1474	SYN1	1.32553	4.82777	CNIH4	1.59492	9.32684
POLE2	1.99734	13.1286	LAMP3	1.15881	4.82186	FAR2P2	3.10914	9.30664
TTK	3.06775	13.1257	SLC7A7	1.21813	4.80958	AC140481.3	3.10914	9.30664
WDR62	2.77507	13.1201	KIF20A	1.65655	4.80945	ALG1L	1.42345	9.28734
SPC25	2.58446	13.0924	GINS4	1.2217	4.80762	BCAT2	1.07395	9.22236
RAD51D	1.41348	13.0918	AC009630.2	1.2217	4.80762	MOCOS	1.95312	9.20145
CENPE	2.67505	13.0904	KIF18A	1.32247	4.80577	WIPF2	1.23103	9.16406
TIMELESS	2.22596	13.0768	CLDN7	2.6593	4.7881	MIR378D2HG	1.20557	9.08225
SPAG5	2.64837	13.069	AC003688.1	2.6593	4.7881	TET1	1.88205	9.08174
DCAF13	1.7971	13.0655	UBXN10	1.62335	4.75616	ANGPTL4	1.06532	9.07269
GTPBP4	1.59332	13.0622	C1orf216	1.19338	4.74198	FSTL4	1.37271	9.03262
PUS1	1.60417	13.0616	PKDCC	1.32169	4.73556	AC010307.3	1.37271	9.03262
AC091057.1	2.44227	13.0607	PARPBP	1.21687	4.73323	PALM	1.68895	8.96649
C1orf112	2.02978	13.0573	CENPH	1.03488	4.71446	RHOXF2B	2.15822	8.93625
DNA2	2.5124	13.0318	CCNB1	1.07023	4.70635	RHOXF2	2.15822	8.93625
E2F7	3.26112	13.03	QPCT	1.06321	4.6891	MMP3	3.9844	8.9299
CDC45	2.85034	13.0291	MCM3	1.02379	4.68438	UBE2NL	1.48794	8.90487
HASPIN	2.83673	13.0273	CCNA2	1.37763	4.65961	AC117473.1	1.35008	8.90225
UHRF1	2.86669	13.0254	FAM72B	1.55123	4.65808	CDRT1	2.85587	8.89967
GDF15	3.72372	13.0243	SGO2	1.23567	4.65254	AC005324.3	2.85587	8.89967
CENPI	2.40921	13.014	HMMR	1.25416	4.6335	XRCC2	1.32351	8.89523
SLC38A7	1.38758	13.0124	FJX1	1.35604	4.57982	GUCD1	1.18017	8.88266
CHEK1	2.05149	13.0107	HHEX	1.24457	4.57422	HIST1H2BE	1.22383	8.87037
PLA2G7	3.43254	12.9805	TGFBI	1.12414	4.56286	VSTM4	1.60182	8.86526
PRC1	2.44178	12.9757	KLK6	1.78738	4.56072	TXN	2.15818	8.85928
TXNDC12	1.2019	12.9719	BUB1	1.60401	4.55988	XRN1	2.66728	8.85571
CBFB	1.62217	12.9689	EPHX4	1.43298	4.55755	AGPAT1	1.33427	8.84686
PNO1	1.33181	12.9537	FAM72D	1.31899	4.53317	ANXA2	2.96521	8.83236
KIF15	2.66165	12.9495	FAM72C	1.31899	4.53317	PITPNM3	2.20377	8.81112
KPNA2	2.03265	12.9445	FAM72A	1.31899	4.53317	WNT2	1.46357	8.80439
SPDL1	1.81272	12.9188	CENPL	1.12843	4.52197	AC002465.1	1.46357	8.80439
C1orf131	1.38835	12.8963	SLC43A3	1.01724	4.51202	AC004009.2	3.93332	8.79061
ADAMTS12	3.62429	12.8814	AP000781.2	1.01724	4.51202	SLC25A25-AS1	1.10917	8.78898
POLR1B	1.59293	12.8739	HOXC10	1.54417	4.51153	POF1B	3.94914	8.7842
RAD54B	2.17863	12.8723	AL359834.1	1.51378	4.5058	PLEKHA7	1.04871	8.77885
DNAJC2	1.58558	12.871	TTK	1.12445	4.4942	FOS	1.92714	8.77278
TBC1D31	1.89458	12.8629	SAPCD2	1.20891	4.49306	SFN	1.4821	8.74106
C5orf34	2.20118	12.8513	METTL9	1.11972	4.49118	FAR2P1	2.09637	8.72222
SLX4IP	1.70889	12.8503	IGSF6	1.11972	4.49118	AC079776.4	2.09637	8.72222
NCAPH	2.84153	12.8496	ADGRE2	1.26065	4.48023	NOP16	1.62589	8.68687
IPO4	1.60278	12.8486	FCGR2C	1.00082	4.46856	ARL10	1.62589	8.68687
ZNF267	1.5991	12.8454	FCGR2B	1.00082	4.46856	BUD23	2.82669	8.67892
KIF20B	1.98404	12.8392	AL451067.1	1.00082	4.46856	TSTA3	2.62576	8.63373
GGCT	1.5889	12.826	CDCA2	1.14155	4.45742	EXOSC4	1.53329	8.62184
FAM72B	2.90554	12.8218	AC019117.2	1.69904	4.41995	REPS1	1.02362	8.61739
KIF2C	2.63483	12.8185	AC019117.1	1.69904	4.41995	LINC01273	1.31921	8.58547
CDC7	2.29602	12.8117	MIR181A1HG	1.02251	4.4169	GLYCTK-AS1	1.64891	8.57281
LRFN4	2.53239	12.7993	BAIAP2L2	1.41441	4.39269	GLYCTK	1.64891	8.57281
SLC39A10	2.24088	12.7886	CCL18	2.25313	4.38079	LINC01755	1.63799	8.55383
DDX55	1.40422	12.7789	LAMC2	1.39357	4.36342	SVOPL	1.20077	8.52794
SKA1	2.72948	12.7766	AC005343.4	1.01401	4.35714	MYBBP1A	2.46112	8.52421
PLK1	2.7099	12.7733	SERPINB2	2.67755	4.33741	AL355140.1	1.29516	8.52204
ASF1B	2.60095	12.7664	SERPINB10	2.67755	4.33741	AC099398.1	1.15555	8.51932
DDX18	1.27386	12.766	SEMG1	1.50992	4.33691	NTNG1	1.61133	8.49657
BUD23	1.25591	12.765	DLGAP1-AS2	1.02096	4.3366	MMP10	2.49471	8.4964
CKS2	2.34567	12.765	APOE	1.09309	4.30683	FOXD2	1.96238	8.48243
E2F1	2.39778	12.752	AC024257.1	1.14506	4.30278	LINC01797	1.49439	8.47612
MNX1	3.17609	12.7363	CTSLP8	1.07657	4.29461	ELOC	1.09505	8.46526
CASP2	1.59	12.725	AC103705.1	1.05643	4.28948	AMMECR1	1.434	8.45637
CCNB2	2.47672	12.7221	SNHG4	1.06077	4.28426	LINC00857	2.33359	8.45296
ERCC6L	2.65121	12.7163	SIL1	1.06077	4.28426	GPSM2	2.04766	8.4513
FAM91A1	1.77161	12.7119	BRIP1	1.07318	4.26556	AKNAD1	2.04766	8.4513
RFC4	1.70705	12.7077	FUOM	1.09591	4.2585	USP40	1.92898	8.45062
UTP25	1.52295	12.7024	Z84488.1	1.17925	4.24792	RAC1	1.07242	8.44148
SGO2	2.27724	12.7004	CALHM6	1.17925	4.24792	CA13	1.76142	8.42482
NUDCD1	1.82157	12.6905	CLDN3	2.00955	4.23987	HOXB13	2.7166	8.40942
EIF2AK1	1.2058	12.6849	TMEM158	1.71891	4.22891	FRS3	1.40089	8.40225
FANCA	2.49182	12.6833	GJB5	2.3544	4.2203	OVCH1-AS1	1.62153	8.38699
AC073611.1	1.62984	12.6636	LINC01637	1.02969	4.21402	OVCH1	1.62153	8.38699
METTL1	1.51553	12.6523	AP000526.1	2.07338	4.19979	LY6E	2.64706	8.37502
TEDC2	2.51986	12.6498	CLEC7A	1.02002	4.19386	TRIM35	1.2802	8.35594
NUDT5	1.3345	12.6426	AP003396.5	1.46636	4.17969	SERPINB6	2.30133	8.35206
PLK4	2.33485	12.6407	SULF1	1.57901	4.17681	CRKL	2.83716	8.34727
TNFRSF10B	1.93074	12.6373	GJB3	1.58358	4.16185	E2F8	1.0073	8.315
AC131009.3	2.35231	12.6368	SERPINA3	1.72307	4.16126	CSRP3-AS1	1.0073	8.315
C1QTNF6	2.40038	12.6318	AL049839.2	1.72307	4.16126	C19orf44	1.54133	8.29722
DEPDC1	2.94088	12.6303	HIST1H2AI	1.28575	4.15883	AC008764.1	1.54133	8.29722
MAD2L1	2.44215	12.6277	TREM2	1.2549	4.14981	SLC16A3	1.05022	8.28314
ILDR1	3.30485	12.6235	AC124798.1	1.07184	4.13779	CSNK1D	1.05022	8.28314
SRSF10	1.26964	12.6132	CENPU	1.15014	4.11707	KBTBD11-OT1	4.56714	8.28073
HMGB3	2.26451	12.6049	TMPRSS5	1.15657	4.11249	KBTBD11	4.56714	8.28073
QTRT2	1.53398	12.602	PTTG3P	1.04904	4.08771	ABLIM2	1.19421	8.26874
EPCAM	3.07839	12.6003	AC007128.2	1.6102	4.07302	SLC22A4	2.41074	8.25422
GORAB	1.41199	12.5965	HOXB-AS4	2.22637	4.06238	OCLN	3.40485	8.24232
HSP90AA1	1.53582	12.5951	CDC25A	1.31073	4.06179	DCST1	1.50906	8.23039
DDX21	1.69276	12.5841	TESMIN	1.08305	4.06029	SPNS2	1.44962	8.21084
RECQL4	2.75354	12.5839	MMP12	2.16643	4.05352	AC004009.1	2.70473	8.20934
AURKB	2.88522	12.5746	LIPG	1.2772	4.05012	PLK1	1.36107	8.16865
CLN6	1.57921	12.5669	RGS1	1.15289	4.04	AC087477.5	2.19007	8.1606
CENPA	2.88159	12.5662	SHCBP1	1.26052	4.02667	AC087477.2	2.19007	8.1606
PHF14	1.51702	12.5431	TNFAIP6	1.50512	4.02239	IL32	2.15463	8.13135
KNL1	2.75014	12.539	CEACAM7	2.23663	4.02108	AC117464.1	1.58986	8.12712
MEST	2.69741	12.5345	AL009179.1	1.17979	4.01624	SEC22B4P	1.6213	8.12697
PUS7	2.05767	12.5316	MMP3	2.40777	4.01341	PPIAL4F	1.6213	8.12697
WDR75	1.37939	12.5283	BHLHE41	1.23164	4.01062	PPIAL4E	1.6213	8.12697
PPAT	1.92493	12.5233	CXCL6	1.80842	3.99379	UBQLN1	1.06327	8.11824
GNL2	1.20891	12.5214	GINS1	1.09549	3.98542	HOOK3	1.33196	8.09046
HNRNPA2B1	1.17509	12.5203	ITGAX	1.3762	3.98441	AC110275.1	1.33196	8.09046
RRM2	2.8157	12.5136	FOXD1-AS1	1.70083	3.98369	NAGLU	1.06978	8.08367
CDC25C	2.67712	12.5079	LINC01614	1.97472	3.98126	AC067852.1	1.06978	8.08367
SMYD5	1.28334	12.5006	GAL3ST2	1.15345	3.98113	PAK1IP1	1.38024	8.07105
NIFK	1.23585	12.4962	TFF3	2.53926	3.97903	OSMR	1.98609	8.06099
TNFSF11	3.42721	12.4895	HOXA13	2.19549	3.97235	TKT	1.84537	8.05447
ZNF195	1.6643	12.4868	C6orf15	1.066	3.96989	AC021087.3	2.09305	8.01081
TIGD1	1.92799	12.4827	HOXC8	2.12487	3.95068	CCDC198	2.88228	8.0064
APMAP	1.5046	12.4733	CLRN3	2.10814	3.94361	E2F4	1.61283	8.00563
ADAM12	3.86042	12.4698	DSCC1	1.4294	3.94026	ATP6V1G2-DDX39B	1.52922	7.99692
PRPF40A	1.19821	12.4661	AP005717.2	1.4294	3.94026	ESRP1	2.28913	7.99688
TRAF2	1.49813	12.4639	HOXD11	1.2675	3.93691	STRIP2	3.18231	7.99239
BRIX1	1.61715	12.463	PMAIP1	1.11219	3.93421	AC016722.2	1.03024	7.96675
ALG3	1.50778	12.455	GGH	1.13222	3.92552	MIA2	1.16814	7.94928
ZHX1-C8orf76	1.88302	12.4523	OLR1	1.42912	3.92217	ULBP2	4.57885	7.94556
MASTL	1.69127	12.4508	PRSS33	1.01657	3.90287	BTNL8	2.60761	7.92594
NME1	1.86791	12.4442	NEB	1.41213	3.87676	AC007608.2	1.37265	7.9227
NOL10	1.19103	12.4371	CHI3L1	1.17179	3.87553	C9orf72	1.98755	7.92229
ZNF367	2.05211	12.4333	CXCL10	1.3361	3.86101	AL451123.1	1.98755	7.92229
MMS22L	1.97087	12.4307	ART3	1.3361	3.86101	HIST1H3G	3.71225	7.92017
CCNB1	2.39568	12.4277	ESM1	1.85815	3.85635	AC007639.1	2.24094	7.91116
ADAMTS14	2.93143	12.4151	HMMR-AS1	1.1282	3.82617	SH3PXD2A-AS1	6.31711	7.8908
TREM2	3.4371	12.3719	GPNMB	1.1534	3.82357	OCIAD2	1.42256	7.88422
PBK	3.04246	12.3683	F5	1.40284	3.81359	AC079768.4	1.45146	7.87474
WDHD1	2.03853	12.3668	VIL1	2.22067	3.80258	PARPBP	1.41246	7.8584
TMEM138	1.08646	12.3533	AREG	1.26017	3.79436	AL691403.1	1.08781	7.84082
ANAPC1P4	2.58534	12.3428	KLK1	1.41431	3.78068	AF111167.1	1.08781	7.84082
ZNF695	3.59931	12.3444	OR2B6	1.43984	3.77556	LINC02464	1.51438	7.83036
TTYH3	2.35674	12.3393	MSLN	2.17242	3.76172	AL356299.2	1.94778	7.80094
SAPCD2	3.02008	12.3357	COL12A1	1.19966	3.72201	FOPNL	1.58525	7.77744
FOXD2	2.95553	12.333	ADAMTS12	1.33711	3.70421	EFNA1	1.6523	7.7731
AURKA	2.63257	12.3181	TM4SF19-AS1	1.30662	3.69825	MIR2052HG	1.49618	7.76697
LRP8	2.92644	12.3122	TM4SF19	1.30662	3.69825	EZR	2.16762	7.74763
COLGALT1	1.54707	12.3071	AC100861.2	1.10276	3.69362	AL365226.2	4.88086	7.74042
APOC1	3.65099	12.3026	AC100861.1	1.10276	3.69362	ARHGAP5	1.79289	7.73564
PTRH2	1.28435	12.2888	REG4	2.77003	3.66933	AL161665.1	1.79289	7.73564
POLG2	1.43869	12.2796	RPL39L	1.02899	3.66198	PCDHGB3	1.03839	7.72822
GRIN2D	4.00211	12.2744	CCNE1	1.4713	3.655	PCDHGB2	1.03839	7.72822
KIFC1	2.6517	12.2703	HOXB6	1.23575	3.65031	PCDHGB1	1.03839	7.72822
DCBLD1	1.73297	12.2551	KCNQ3	1.12748	3.64531	PCDHGA6	1.03839	7.72822
C8orf76	1.43843	12.2493	BAMBI	1.18794	3.59182	PCDHGA5	1.03839	7.72822
STK3	1.54426	12.2489	PLEKHS1	1.67388	3.58503	PCDHGA4	1.03839	7.72822
NAA25	1.52095	12.2438	AC007750.1	1.59762	3.57336	PCDHGA3	1.03839	7.72822
CCNF	2.2853	12.2285	CTHRC1	1.21735	3.57276	PCDHGA2	1.03839	7.72822
DDX31	1.50841	12.2203	AC254629.1	1.99347	3.56665	PCDHGA1	1.03839	7.72822
PRRC2C	1.34346	12.2165	CEACAM6	2.47057	3.56415	AC098934.1	1.58378	7.72639
ATP11A	2.34565	12.2125	AC243967.2	2.47057	3.56415	CCL15	5.9421	7.7232
PNPT1	1.60158	12.2118	ONECUT2	2.21934	3.55916	PRICKLE4	2.09485	7.71241
NDC1	1.89016	12.2107	GRB14	1.30281	3.55896	KIAA1755	1.02654	7.70344
ZNF281	1.37646	12.2036	TNFAIP8L3	1.09846	3.55017	GGTLC4P	1.16872	7.68665
SLC5A6	1.92196	12.2017	CDCA4	1.26761	3.54478	GGTLC2	1.16872	7.68665
ATIC	1.36093	12.1838	MDK	1.02141	3.5445	AL049749.1	1.01716	7.68485
RFWD3	1.68361	12.1726	MMP7	2.15542	3.54413	CDX1	3.68401	7.67772
CYRIB	1.48412	12.1669	ECM1	1.09239	3.54359	CXCL1	2.17342	7.67694
JRKL	1.53736	12.1612	CEACAM8	1.08301	3.52424	MBTPS1	1.47915	7.6673
POC5	1.24313	12.1563	CEACAM3	1.76752	3.49212	SLIRP	1.30573	7.65816
ZNF485	1.68735	12.1541	PDE4B	1.08257	3.48561	SKIDA1	2.03703	7.65708
DONSON	1.57186	12.1512	LIPE-AS1	1.61002	3.48359	CXCL2	2.26115	7.64314
RNFT2	2.51546	12.1496	CEACAM1	1.61002	3.48359	YIF1B	2.48553	7.63923
PSMD14	1.23431	12.1473	THBS2	1.46498	3.47578	C19orf33	2.48553	7.63923
NKRF	1.54246	12.1461	BX322234.1	1.46498	3.47578	AC011479.1	2.48553	7.63923
UCK2	1.44066	12.1422	SLC5A12	1.5528	3.47267	ELMO2P1	3.20871	7.63815
CNPY2	1.22986	12.1325	AC067956.1	1.21175	3.46693	LINC02251	1.1244	7.62565
NOP56	1.55748	12.128	AJUBA	1.16219	3.4553	GYG2-AS1	1.00736	7.60409
TESMIN	2.69542	12.1185	AC011287.1	1.46391	3.45518	GYG2	1.00736	7.60409
HSPD1	1.78698	12.1081	CXCL1	1.13904	3.45262	DDX31	1.82019	7.57903
SNX10	2.38599	12.1054	PIWIL1	1.61245	3.44012	ZMYND15	2.31513	7.57375
LRRC8D	1.40763	12.1041	KRT80	1.00027	3.41497	PRAME	1.31409	7.56636
SERPINH1	1.94258	12.103	CDKN2A	1.27301	3.41224	RUFY1	2.15977	7.55107
KAT2A	1.55763	12.0869	MGAM2	1.98999	3.40166	ENO1	1.51832	7.54483
TIMM8A	1.39349	12.0823	FAM83D	1.13989	3.39686	LGALS4	3.19067	7.53952
CDC6	3.10225	12.0822	S100A9	1.73411	3.3856	PDE6B	1.34566	7.53479
IQANK1	3.28115	12.0747	AC023194.3	1.4002	3.38272	SMIM9	1.10852	7.53137
GINS4	2.32061	12.0687	BX119904.2	1.92368	3.37675	GGTLC1	1.13194	7.51858
NUP85	1.27481	12.0658	TLR8	1.04645	3.36576	POLD1	1.05829	7.51588
NEIL3	2.62091	12.0574	CHEK2P2	1.0403	3.35685	LINC01123	1.57907	7.50178
AVL9	1.42783	12.0572	CXCL11	1.2012	3.33437	LINC01106	1.57907	7.50178
WNT2	4.68773	12.0614	ALKAL1	1.01965	3.32669	CHAC1	1.82014	7.48427
TRMT6	1.57946	12.055	RARRES1	1.12681	3.32153	KPNA2P3	1.57902	7.47934
CCT6A	1.53282	12.0496	CT83	1.86465	3.31051	AC136475.2	1.50166	7.46117
CLDN1	3.76587	12.0365	C4BPA	1.44232	3.30497	AC124067.4	4.14977	7.45463
CKAP2	2.14123	12.0303	PI3	1.96684	3.29269	TNFAIP1	1.50264	7.45153
LIMK1	1.63568	12.0208	MISP	1.31007	3.28933	EIF2S3	1.17738	7.44716
BIRC5	2.76977	12.0168	MAGEA6	1.32523	3.28764	LINC02010	1.44644	7.43539
AC099850.4	2.47469	12.008	MAGEA3	1.32523	3.28764	AC092957.1	1.44644	7.43539
AC008555.7	1.79776	12.0076	MAGEA2B	1.32523	3.28764	LGALS3	1.56875	7.4273
CCAR1	1.16758	12.0038	MAGEA2	1.32523	3.28764	AC074117.1	1.24124	7.4164
CSPP1	1.53129	12.0014	OVOL1	1.13523	3.28288	ENPP3	1.73713	7.40786
FANCF	1.40605	11.9864	AP001266.1	1.13523	3.28288	CTAGE9	1.73713	7.40786
TWNK	1.80771	11.979	AL356134.1	1.42599	3.28025	TMC7	2.00913	7.3959
LSG1	1.4287	11.978	RAET1K	1.09609	3.2709	TIGD5	1.19995	7.37058
C2orf15	2.03335	11.9748	ERCC6L	1.04831	3.25794	KNOP1	1.23362	7.36277
UTP6	1.26398	11.9732	FNDC1	1.49752	3.24936	AC002550.1	1.23362	7.36277
FOXS1	2.98901	11.9729	MMP10	1.59676	3.2366	ZNF804A	1.49899	7.36274
POP1	1.80089	11.9719	CD80	1.29602	3.23487	GNL2	1.23651	7.33598
SUV39H2	1.58337	11.9594	PSG8	1.3199	3.22258	ARL5B	1.56267	7.31436
URB2	1.81323	11.9442	PSG10P	1.3199	3.22258	KRTAP20-3	1.45887	7.29844
ZNF124	1.58143	11.9426	CCR4	1.18481	3.22176	STIL	2.96489	7.29421
ARHGEF38	2.96824	11.9402	KIAA1211	1.44158	3.19123	SMIM5	2.66223	7.29016
ACTL6A	1.50203	11.9384	CD55	1.08953	3.18486	RHOC	1.93895	7.28018
FHOD1	1.46392	11.9363	AC073585.1	1.05026	3.17813	AL603832.3	1.93895	7.28018
DNMT1	1.70989	11.9236	NMU	1.0244	3.11501	AOC4P	1.34972	7.26032
CYP27B1	2.79152	11.9185	LINC00858	1.57429	3.11151	SLC39A5	3.72506	7.25733
ALG8	1.43371	11.9183	AQP9	1.25454	3.10901	MYO1B	1.7848	7.2532
TMEM267	1.41482	11.9179	ALDH1A2	1.25454	3.10901	HTR1D	3.31865	7.25189
ORC1	2.62947	11.9176	TREM1	1.31216	3.07006	AC073934.1	1.0646	7.25119
CDKN3	2.26154	11.9174	MUC3A	1.48335	3.04582	AKAP14	1.66815	7.24284
FIGNL1	1.80145	11.9063	SERPINB4	1.60569	3.03991	AL035258.1	1.62082	7.23465
COL1A1	3.33809	11.9027	MUC13	1.56517	3.02389	AKR1D1	1.97836	7.22739
RBM12B-AS1	2.10113	11.8974	MALL	1.41491	3.01419	NOS2P3	5.80706	7.22244
STRIP2	2.85423	11.8914	SLC27A2	1.15453	3.00495	CEACAM6	2.76141	7.2224
SLC52A2	1.78511	11.881	CFTR	1.00717	2.9998	AC243967.2	2.76141	7.2224
SNRPD1	1.60109	11.8739	MUC12	2.00133	2.99334	TAGLN	2.13947	7.22034
DSN1	1.65862	11.8719	KLK7	1.89111	2.97922	PCSK7	2.13947	7.22034
CENPU	2.34603	11.8713	POTED	1.12639	2.97377	AP005018.2	2.13947	7.22034
TWISTNB	1.27065	11.8548	POTEC	1.12639	2.97377	AP000892.4	2.13947	7.22034
DIAPH3	2.38272	11.8547	CCRL2	1.2689	2.9718	INTS9	1.39622	7.21563
FANCB	2.3365	11.8489	SERPINB5	1.79703	2.9702	PRELID1	1.17907	7.21557
SLC30A7	1.36215	11.8474	TMEM150B	1.27698	2.95484	MXD3	1.17907	7.21557
KNSTRN	1.7863	11.8369	CDH17	1.91113	2.95108	UBXN11	1.5112	7.19806
PPM1H	2.54003	11.8318	POTEB3	1.32471	2.95047	CAMK2N1	2.04278	7.19678
SINHCAF	1.91005	11.8284	POTEB2	1.32471	2.95047	VPS37A	1.02616	7.19472
RTKN2	2.73932	11.8251	POTEB	1.32471	2.95047	R3HDML	2.96863	7.19417
LMNB1	2.27442	11.8226	CEACAM5	1.34898	2.93918	AL117382.1	2.96863	7.19417
AL161891.1	2.32427	11.8147	AC243967.1	1.34898	2.93918	CSNK1A1L	1.18632	7.19208
MTPAP	1.30462	11.8114	KRT23	1.0623	2.93756	SAPCD1	3.04798	7.18856
RAD54L	2.47547	11.8024	AC004231.1	1.0623	2.93756	IMPA1P1	1.85426	7.18726
BGN	2.94028	11.7996	MARVELD3	1.00789	2.93541	DNAH17-AS1	1.66518	7.1763
MTERF3	1.37247	11.7993	ANXA13	2.23738	2.93462	DNAH17	1.66518	7.1763
MRPL17	1.12461	11.7986	CRISP2	1.74233	2.91817	URGCP	1.50625	7.16308
HSPE1	1.57752	11.7907	NPC1L1	1.47862	2.88823	CDH17	1.87353	7.1596
PROSER1	1.61665	11.7872	LINC01819	1.27108	2.88448	POU5F1P4	1.11173	7.14966
FAM111B	2.68573	11.779	STK31	1.16403	2.88283	SPINK4	2.12887	7.14543
CSTF3	1.19784	11.7783	TFAP2A-AS2	1.24608	2.87778	AL109924.2	2.05073	7.14216
HROB	2.13652	11.7674	NR5A2	1.00296	2.8484	RASAL2-AS1	1.10844	7.13466
PLOD3	1.90373	11.7669	AC105415.1	1.21457	2.83876	AL137026.2	1.06642	7.11375
PDCD11	1.58269	11.76	CXCL8	2.20862	2.82626	AC092757.2	1.31956	7.10616
XPO1	1.44031	11.7448	F2R	1.04103	2.82239	SAMD9	1.17235	7.09523
RUVBL1	1.47248	11.7399	CXCL9	1.10409	2.82156	WDR66	1.11651	7.0897
DPH2	1.34065	11.7386	AC112719.2	1.10409	2.82156	AKR1C4	2.71129	7.08791
TSN	1.23231	11.7319	CCDC162P	1.0845	2.80025	CDK7	1.03721	7.08719
DDX11	1.90731	11.7288	KRT6C	1.87078	2.78005	ATP6V1C2	1.16288	7.08395
QSOX2	1.74629	11.7253	EDN3	1.48246	2.75688	PLET1	1.01704	7.07468
LIF	2.81057	11.7212	MAGEA12	1.64119	2.75657	PLBD1	1.76747	7.06955
GARS1	1.26823	11.7147				RAC1P2	1.68572	7.06666
RCC1	1.92704	11.707				RALY-AS1	1.15677	7.05946
CDC20	2.71964	11.7043				POLR1C	1.58258	7.0507
CD3EAP	1.72112	11.6991				AP002478.1	5.10737	7.04477
KRT18P15	2.30129	11.7014				KRT19P2	2.79066	7.044
RRP12	1.61575	11.6884				KIF23	1.97519	7.03811
CCNA2	2.47529	11.6879				IL13RA2	2.49155	7.03795
TIPIN	1.46138	11.6871				TM4SF5	4.18443	7.02688
OBI1	1.47582	11.6852				POC1A	1.98127	7.02444
NIT2	1.06081	11.6784				RAB43	1.00801	7.01642
PAICS	1.63524	11.6758				AC092368.3	1.00801	7.01642
TARBP1	1.74612	11.6756				AFAP1-AS1	4.33005	7.01212
NCAPG2	2.01924	11.674				AFAP1	4.33005	7.01212
B3GNTL1	1.56704	11.672				MPDZ	1.98853	7.00332
DDX10	1.33018	11.6683				AL031123.2	2.10732	6.9902
MCM4	2.06618	11.6651				NAPRT	1.81012	6.98994
RAB3IP	1.87249	11.6638				AC067930.4	1.81012	6.98994
CHEK2	1.74083	11.6619				AC018742.1	2.33249	6.98395
AUNIP	2.25593	11.6565				AC009065.5	2.57069	6.98241
MMP11	4.00191	11.6556				AC009065.2	2.57069	6.98241
PCNA	1.80153	11.6427				SLC16A13	1.06442	6.98233
KIF26B	3.0751	11.6408				AC004949.1	1.28774	6.97871
TARDBP	1.08764	11.6353				FILIP1	1.04184	6.96779
AC019069.1	2.38337	11.6335				AL445465.1	1.04184	6.96779
EMG1	1.10925	11.6324				LINC02145	1.27087	6.95388
EFTUD2	1.35156	11.6323				AURKA	1.7967	6.94269
BMP1	1.78133	11.6318				LMNA	2.26289	6.93963
TACC3	2.09841	11.6281				KIF12	1.04705	6.93197
DUS4L	1.38551	11.6243				TAS2R46	1.2036	6.92952
DDX56	1.12611	11.6225				TAS2R14	1.2036	6.92952
SLC20A1	1.55252	11.6212				PRH1	1.2036	6.92952
CGAS	2.00368	11.6056				AC018630.2	1.2036	6.92952
PSMD11	1.20485	11.6049				PDZD11	1.53982	6.92492
SRSF2	1.16328	11.585				OR7E14P	1.16777	6.92394
SLC25A32	1.34025	11.5721				AL136038.3	1.50613	6.90652
ALG6	1.27101	11.5711				NLRP6	1.61971	6.88249
THOC2	1.38492	11.557				MUC17	4.69027	6.87816
ATP13A3	1.65288	11.5524				SNRPA	2.00164	6.87602
SNRPA1	1.30767	11.5416				HERC2P10	1.29578	6.84088
DCLRE1B	1.44664	11.5373				MIF-AS1	1.57095	6.83656
OLR1	3.51454	11.5321				MIF	1.57095	6.83656
ETV4	3.33916	11.5283				AP000350.4	1.57095	6.83656
PAM16	1.23109	11.5275				CIB1	1.10814	6.83207
IL17RB	2.45434	11.5265				AC007064.2	2.49274	6.82243
TOMM34	1.67412	11.5242				MAT2A	1.15919	6.8215
ABCE1	1.51323	11.5182				RBM8A	1.24161	6.82041
CNOT9	1.11656	11.5173				LIX1L-AS1	1.24161	6.82041
FEN1	1.71706	11.5168				CSF3	1.27978	6.8194
BORA	1.9736	11.515				DCAF17	1.35937	6.8158
HAUS7	1.50778	11.5093				KLK6	3.42548	6.81358
NAT10	1.45076	11.5059				AL135905.2	1.03214	6.80435
TCOF1	1.45274	11.4994				AL356534.1	1.33427	6.80422
CSE1L	1.67366	11.4909				QPCTL	1.68255	6.79996
ZNF200	1.21523	11.4905				CYP7B1	1.01535	6.7925
NCBP2	1.26692	11.4903				AC144836.1	1.30562	6.78333
RPLP0P2	2.41292	11.4883				GLIS3	1.13576	6.77856
ODF2	1.37822	11.487				AL162419.1	1.13576	6.77856
MGME1	1.51322	11.4855				MMRN2	1.18445	6.77709
MRPL3	1.13713	11.4842				PIP5K1A	1.77254	6.77108
COA7	1.35979	11.4835				NEUROG3	1.53929	6.76797
ANP32E	1.53519	11.4818				MLLT6	1.4135	6.76761
PTPN2	1.18764	11.4759				AC006449.3	1.4135	6.76761
UBAP2	1.24964	11.4722				NF2	1.13502	6.76699
TMPO	1.59594	11.4718				SNRPD1	1.5177	6.76363
DHX34	1.60464	11.4708				AC103808.2	2.10678	6.75356
HOXC11	5.3416	11.4906				SLC12A9	1.43876	6.74821
FCHO1	2.49737	11.467				PSMB8-AS1	2.14019	6.74776
ENTR1	1.28696	11.4637				PSMB8	2.14019	6.74776
LIG1	1.79847	11.4617				MAPK14	1.16652	6.74075
CAD	1.74939	11.457				CDCP1	1.82672	6.73583
RBL1	1.79489	11.4569				AL121908.1	1.32606	6.73535
CASP8	1.36586	11.4514				ATF4P4	1.17882	6.72376
ZDHHC9	1.56895	11.4444				ZNF696	1.39232	6.71497
AC124947.2	3.14193	11.4462				FAM114A1	1.74721	6.71141
CEMIP	4.05673	11.4353				ST6GALNAC2	2.27431	6.70833
SASS6	1.60971	11.4234				AC015802.6	2.27431	6.70833
TFAP4	1.50115	11.4218				DOK4	1.89331	6.69136
TYMS	2.05873	11.4216				C8B	1.19283	6.68018
BMS1	1.30897	11.4103				AC113146.1	1.20311	6.67987
PSMD1	1.11438	11.4054				CNEP1R1	1.37471	6.67977
IFI30	1.99997	11.4054				OTX2	1.95683	6.6795
SCLY	1.48768	11.3967				PIK3C2B	2.5614	6.67782
CCDC43	1.06416	11.3964				CDC6	2.12211	6.67499
MCM8	1.82884	11.3924				LRRC1	1.43237	6.67126
MCM2	2.1224	11.3919				RHPN2	2.27205	6.65973
CENPP	1.31618	11.3916				AC091180.5	1.21712	6.65381
NUP107	1.67596	11.3884				DPP4	3.3704	6.64736
COX19	1.3794	11.3856				PPIAL4A	1.18733	6.63812
CENPN	1.7174	11.3855				STON2	2.04734	6.6301
G3BP1	1.13429	11.3848				PFDN2	1.31256	6.61677
DLEU2	1.95115	11.3842				PBK	2.78087	6.61642
CHTF18	2.00614	11.3842				ESCO2	2.78087	6.61642
MSH2	1.69354	11.383				LGALSL	1.60569	6.60887
SNRPG	1.23202	11.3823				GRHL2	1.58113	6.59675
TPM3	1.27493	11.3724				AC007255.1	1.00985	6.59658
AC026356.1	1.93768	11.3655				DEPDC1B	2.76375	6.59018
PABPC1L	2.88588	11.3574				MID1	1.61665	6.58179
AC007406.3	2.65834	11.3569				AL132639.2	2.08168	6.57673
POLR1C	1.43065	11.3444				KIF1B	1.32961	6.57138
POU2F1	1.44798	11.3428				FAM83E	2.47125	6.56794
MPLKIP	1.08488	11.34				DSC2	4.3623	6.56618
CDK5RAP1	1.25196	11.3393				WDR44	1.30229	6.56426
MRM2	1.16015	11.3358				SH3TC1	1.13869	6.55393
VAV2	1.77534	11.3341				PRSS1	3.02666	6.54692
PALB2	1.42586	11.3268				ZFHX4	1.63224	6.54382
LSM5	1.21551	11.3252				SELPLG	1.00748	6.54213
SRPK1	1.44205	11.3218				MBNL2	2.26819	6.53873
P4HA3	2.66093	11.315				LINC01716	1.1233	6.53719
C2orf27A	2.03784	11.3145				MSRB1	1.30893	6.53599
UTP14A	1.28641	11.3142				GCAT	1.42094	6.52989
TAF1D	1.50009	11.3135				BBOX1-AS1	3.3003	6.52784
TAF1A	1.54709	11.3125				AP000802.1	1.07499	6.52019
TOPBP1	1.6404	11.3044				ACER1	1.00321	6.51001
MRTO4	1.29742	11.2928				ZNF664	1.06361	6.50961
ANGPT2	2.19228	11.2926				AC068790.8	1.06361	6.50961
PVT1	2.18783	11.2892				AL137847.1	1.75774	6.50783
PA2G4P6	1.62227	11.2846				PSMD1	1.4099	6.5046
BYSL	1.62405	11.2831				ZWINT	1.96875	6.49817
TMEM81	1.3569	11.2767				SEC14L3	2.19797	6.49452
FANCL	1.32443	11.2695				PPP1R14B-AS1	2.99518	6.49433
P3H1	1.53802	11.2689				AP001453.2	2.99518	6.49433
CLDN7	2.77243	11.2618				C4BPB	2.39745	6.49221
NR2C1	1.31839	11.2616				CLINT1	1.38743	6.48494
BUB3	1.28156	11.258				FAM160B1	1.53488	6.48293
AL022322.1	2.52657	11.258				TLR6	1.52071	6.47722
PIK3AP1	2.38199	11.2569				SH2D4B	2.50275	6.47473
SART3	1.07554	11.251				CSNK1G3	1.23073	6.4647
INTS7	1.41367	11.25				ATF3	1.05234	6.46398
NOL11	1.24495	11.2429				KLRC2	1.01058	6.4553
UTP15	1.29416	11.2384				LEXM	1.6862	6.45078
NUP37	1.32484	11.2185				POMC	1.6792	6.43729
DPY19L1	1.81251	11.2147				AC004080.2	3.66047	6.43512
ZNF121	1.51318	11.2126				DOT1L	1.07496	6.4346
FAM72D	2.81523	11.2076				HMGB3	1.1846	6.42477
CYTOR	1.79324	11.2048				AADACP1	2.7317	6.42356
ZBTB33	1.37152	11.2024				PMAIP1	2.6263	6.41221
CMTM6	1.19976	11.2008				FAM224B	1.07957	6.41202
ATR	1.6861	11.1928				FAM224A	1.07957	6.41202
ABHD11	1.84451	11.1928				RBM47	1.16456	6.41085
HEATR1	1.77057	11.1898				FLNB-AS1	1.07907	6.38466
BOP1	1.72638	11.1841				FLNB	1.07907	6.38466
RSRC1	1.12356	11.18				KRT18P27	3.02647	6.37271
PASK	1.70253	11.1746				FO538757.1	1.11973	6.37082
RIF1	1.44448	11.1737				SH3BGRL3	1.09089	6.36616
CPSF3	1.12663	11.1729				AC093732.1	1.58833	6.36462
DHX37	1.44593	11.1632				PKP3	3.21392	6.36113
DLGAP1-AS2	2.70898	11.162				FKBP6	1.64318	6.34467
OIP5	2.13549	11.1583				FBXL18	1.47424	6.33282
RMI2	1.95011	11.1576				AC006111.2	3.04729	6.31812
YDJC	1.6723	11.1574				NEAT1	1.15293	6.30046
TICRR	2.55888	11.1551				RBM22	1.06114	6.29641
DUSP12	1.08886	11.1541				GGT6	1.83671	6.29535
ORC2	1.16693	11.153				TCF7L2	1.06539	6.29449
TTI1	1.44577	11.1519				KRT19	2.47238	6.29409
PAK1IP1	1.35772	11.1503				SNX22	1.24936	6.29273
MPHOSPH10	1.00784	11.1499				PPIB	1.24936	6.29273
TGS1	1.37482	11.1443				PROP1	1.70406	6.29001
AC074117.1	1.60428	11.1427				LINC01224	2.58608	6.28948
TTC13	1.36304	11.1427				USH1C	2.03896	6.28223
NUP62	1.21508	11.1403				RDH5	1.66183	6.27803
PTBP1	1.1895	11.1312				AL691482.3	3.12225	6.25942
HOXC8	4.46261	11.1413				ERAP1	1.25595	6.25884
CTPS1	1.54233	11.1275				NFKB2	1.44887	6.25444
VMA21	1.41723	11.1251				LINC01230	1.38206	6.25349
PSMD12	1.06862	11.1197				MYSM1	1.56889	6.2526
TEFM	1.05141	11.1165				ACAP2	1.0646	6.24025
HSP90AB1	1.42598	11.1106				DHRS11	1.95329	6.23899
NASP	1.35078	11.1015				SRP14-AS1	1.10814	6.23816
MND1	2.11458	11.0979				AC021755.2	1.10814	6.23816
MYO1B	1.79071	11.0959				MST1P2	1.37319	6.23177
MZT1	1.5856	11.0957				PLEK2	3.00034	6.22494
ENOPH1	1.19402	11.0885				C1QBP	1.06115	6.2061
INTS8	1.45569	11.0855				HIST4H4	1.4654	6.20496
PNN	1.23631	11.0824				LINC01397	2.5682	6.2015
LRRC8B	1.50107	11.0712				CYP2C9	3.18785	6.2002
UTP20	1.56369	11.0706				ADAD1	1.13049	6.19967
PAQR4	2.19054	11.0692				HOTTIP	5.38395	6.19845
TOMM40P4	1.72361	11.0667				CPA4	1.59679	6.19798
CKAP5	1.53644	11.0652				BCLAF3	1.01035	6.18436
TCERG1	1.17771	11.0617				ZFAND5	1.05731	6.18182
PAFAH1B3	1.72001	11.0616				RHBDF1	2.30948	6.18061
RRP15	1.22747	11.0585				ENTPD3	1.17122	6.17828
SRSF1	1.14244	11.0584				PCGF5	1.06622	6.17261
FAP	3.398	11.0566				FAM135A	1.55635	6.1548
ADAT1	1.30239	11.0548				AP006748.1	1.18124	6.15021
TTF2	1.5548	11.0543				SNHG17	1.61449	6.14983
IPO9	1.24642	11.0521				IGSF10	1.4599	6.14797
MARVELD3	2.4972	11.0498				NT5C3AP1	1.6195	6.14778
CDT1	2.47469	11.0389				LINC01378	1.6195	6.14778
RBM28	1.3399	11.0318				TSLP	1.82203	6.14426
CHDH	2.25042	11.0274				SNHG3	1.87362	6.13651
LACTB	1.12699	11.0176				RCC1	1.87362	6.13651
VMP1	1.36048	11.0138				LINC01015	1.10528	6.13048
UBAP2L	1.13936	11.0125				MTOR	1.08201	6.12722
MRGBP	1.51687	11.0121				ESPNP	1.42092	6.12359
F2R	2.0849	11.0079				ZNF841	1.7624	6.11952
ARHGAP39	2.06912	11.0037				LRRC59	1.35636	6.11855
TMEM63A	1.71346	10.9988				GK	1.98928	6.11829
MTDH	1.14224	10.9979				AC109495.1	1.4739	6.11586
NAT9	1.2335	10.996				PPP1R17	1.89572	6.11563
AGRN	2.0892	10.9871				CASC19	4.88454	6.11037
GAPLINC	2.46934	10.9907				LINC00346	2.07937	6.1096
EMC3-AS1	1.68403	10.9846				AC062028.1	1.56048	6.1081
CDC123	1.13315	10.9829				VEGFA	1.30866	6.10806
ESF1	1.5667	10.9803				SULT1A4	1.37225	6.08932
RPP25	1.77642	10.9793				C11orf86	1.60962	6.08101
CHD7	1.62032	10.9792				ILF3	1.20552	6.0779
SSB	1.30585	10.9753				LPIN2	1.01196	6.07255
STAC3	1.76472	10.975				ADGRA2	1.05472	6.0691
AC023043.4	2.12518	10.9697				LINC01833	6.14093	6.06277
CKS1B	1.63748	10.9695				PI3	7.29077	6.04194
DDX39A	1.39578	10.9664				SMS	1.08689	6.039
TRPM2	2.31498	10.9639				KLK8	4.09942	6.03124
HAUS8	1.16196	10.9612				AC011483.1	4.09942	6.03124
ARPC5	1.03377	10.9609				AC011473.4	4.09942	6.03124
NOL8	1.28328	10.9566				AL390839.1	1.61995	6.02724
GPR89A	1.23511	10.9538				FOXN1	1.72341	5.99858
FLAD1	1.0948	10.9513				CD46	1.22635	5.98332
PDCD2L	1.48287	10.9406				GATD1	1.1114	5.97825
LIN9	1.56249	10.9364				COLCA2	1.06238	5.9768
SMC2	1.69883	10.9362				SHISAL2B	1.68081	5.97401
TBRG4	1.27612	10.9346				BRI3BP	1.0574	5.97083
ESCO2	2.49619	10.9326				NME2	1.46288	5.97068
TYW1	1.14487	10.9299				PACSIN3	1.39557	5.94388
CORO7	1.25839	10.9281				CCNI2	1.65772	5.94044
BRCA1	1.91935	10.9276				MPV17	1.37909	5.93845
CEP135	1.47778	10.9246				TSKU	1.33863	5.93622
SNRPE	1.21884	10.9192				AC008940.1	1.13138	5.93578
LINC01235	3.45578	10.9195				ATL2	1.64397	5.93253
ZDHHC23	1.89259	10.9162				MUC12	2.13593	5.93132
PARP14	1.83011	10.915				AC105446.1	2.13593	5.93132
TFB2M	1.29148	10.9104				SLC11A1	1.78604	5.92115
GPATCH2	1.15908	10.9103				RESF1	2.41365	5.92028
TRAIP	1.83565	10.909				AC005722.3	1.77223	5.90347
LYAR	1.48154	10.9068				HIF3A	1.30626	5.89065
TBC1D30	2.15451	10.9063				TRIP13	1.93557	5.88722
KRT18	2.58889	10.9058				AC122719.3	1.93557	5.88722
CEP83	1.45143	10.9029				UBE2C	3.05231	5.88653
AC025857.2	2.0096	10.8989				ST6GAL2	2.26162	5.88144
AL133410.1	2.25844	10.8987				ZNF804B	1.13748	5.88126
ZMIZ2	1.33721	10.897				CITED1	1.58347	5.87558
LINC01106	2.00918	10.8983				MELK	1.71735	5.8717
WDR5B	1.23715	10.8947				TALDO1	1.06137	5.86946
MIS18BP1	1.36586	10.8922				ASCC3	1.90208	5.86291
RHEBL1	2.16012	10.8915				AC069277.1	1.16421	5.8572
WDR4	1.48294	10.8877				LINC02608	1.09897	5.8557
SMG9	1.16471	10.8873				OR2V1	2.73732	5.84851
NELFCD	1.45906	10.8864				CFDP1	1.23172	5.8471
NIP7	1.21303	10.8806				AC009054.1	1.23172	5.8471
NHLRC3	1.23744	10.8776				DNAJC25	1.95219	5.84503
SEH1L	1.35904	10.8762				AL391427.1	1.19469	5.8404
YTHDF1	1.2686	10.8736				AKR1C2	1.19469	5.8404
TUBB	1.17688	10.8733				AKR1C1	1.19469	5.8404
KBTBD2	1.15074	10.8725				TPSAB1	1.45689	5.83957
CHAF1A	1.55334	10.8708				FOXB2	1.44852	5.83773
AC005041.3	2.45428	10.8737				CFB	1.6257	5.83659
SLC29A2	1.98054	10.8649				AL645922.1	1.6257	5.83659
NCL	1.19638	10.8646				NEB	1.45653	5.83539
U2SURP	1.33108	10.8624				GALNT5	1.78515	5.83216
FUCA2	1.26918	10.8577				HMGB3P22	1.22909	5.82962
TMEM60	1.04897	10.8569				CBY3	1.22909	5.82962
TSACC	1.88744	10.8549				CANX	1.22909	5.82962
BLOC1S3	1.05585	10.8486				CCDC28B	1.7149	5.82291
TONSL	2.02953	10.8448				MANSC1	1.16249	5.81845
AC004264.1	2.78944	10.8485				AC079768.3	1.01956	5.81792
CCDC34	1.72825	10.8414				DAZAP1	1.62991	5.8155
RTKN	1.72573	10.8403				PTK2	2.08566	5.81539
SPC24	1.78838	10.8353				LINC01018	1.20832	5.81406
DTX3L	1.51705	10.8353				MAFA	1.18421	5.81135
DNAJC22	2.61226	10.8346				RND3	3.3083	5.80994
DARS2	1.71246	10.8343				SUFU	1.1753	5.80708
DNAAF5	1.31542	10.8336				KIAA1211	1.27879	5.80697
TMTC4	1.58766	10.833				ZDHHC9	1.10789	5.80506
XPO5	1.73322	10.8309				INPP1	1.99678	5.80447
AC092718.4	1.66872	10.8288				TMEM45B	2.70523	5.804
AC010542.6	1.92494	10.8287				PRC1-AS1	2.33976	5.78812
HSPD1P1	1.93165	10.8279				PRC1	2.33976	5.78812
PODXL	1.86583	10.8253				AC068831.7	2.33976	5.78812
CHORDC1	1.50676	10.8223				PPP2R2A	1.53796	5.78516
HGH1	1.58824	10.8144				PGP	1.0313	5.78085
TTLL4	1.56702	10.8142				LINC01962	1.75544	5.77468
AC016394.3	1.86545	10.8124				LINC02022	1.52296	5.76997
NVL	1.10256	10.8117				ANKRD18B	2.01252	5.76851
FAM83H	2.48201	10.8106				SIRT5	1.06469	5.75895
SH3KBP1	1.61254	10.8066				AL441883.1	1.06469	5.75895
STMN1	1.66332	10.8017				ZNF185	1.00295	5.7583
MCM3	1.58494	10.7985				CT75	1.54405	5.75563
KDM4A-AS1	1.81826	10.7934				AC010980.1	1.54405	5.75563
CCNJ	1.50341	10.7907				NAA60	1.29693	5.75454
CCDC14	1.71957	10.787				AC004224.2	1.29693	5.75454
UBXN4	1.03626	10.7854				EIF3M	1.13415	5.75449
PPIL1	1.27873	10.7839				CCDC73	1.13415	5.75449
TMC7	2.39587	10.7837				CXCL3	2.69888	5.74845
ZNF7	1.1346	10.7811				TRIM54	1.49773	5.74147
MSH5	2.40017	10.7799				LINC02747	2.68891	5.72789
RHPN1	2.26396	10.7791				OR9A3P	1.30933	5.72127
RPGRIP1L	1.46371	10.7791				HIST1H3E	2.1266	5.7191
MAPK15	3.18628	10.7807				SLC39A8	1.46606	5.71891
AL109615.3	3.47707	10.7783				AC115619.1	1.32485	5.70881
DUXAP8	3.73353	10.7745				TMEM184A	2.16188	5.70758
ADAMTS2	2.96525	10.7724				PPA1	1.16292	5.70341
SLC37A3	1.20753	10.77				MIR31HG	2.36631	5.70301
JPT2	1.24391	10.7656				IFNE	2.36631	5.70301
BLACAT1	3.67354	10.7662				TCN2	1.78241	5.70067
SLC44A3-AS1	2.04713	10.7579				BPY2C	1.30288	5.69823
CCDC138	1.69476	10.7576				BPY2B	1.30288	5.69823
BZW2	1.39393	10.7572				BPY2	1.30288	5.69823
LMNB2	1.71725	10.7539				DNAJB6	1.00424	5.69154
FAM111A	1.47719	10.7498				AC112496.1	2.75234	5.69004
LBX2	2.36137	10.7479				RPP40	1.54707	5.6859
SMC6	1.21041	10.7458				PADI1	1.29317	5.66972
ILF2	1.20927	10.7445				EEA1	1.35044	5.6628
CEMIP2	1.82694	10.7438				GTF2IRD1	1.01279	5.65986
FAM136A	1.15856	10.7427				TBC1D1	2.69258	5.65233
CDC25A	2.25765	10.7422				PTTG2	2.69258	5.65233
KIF24	1.91381	10.7408				AF230666.1	1.27255	5.64376
AC108463.1	2.44286	10.7509				BAAT	1.80075	5.64034
ZNF469	2.84438	10.7406				CYCS	1.21123	5.63945
CENPM	2.27648	10.7369				ADGRF1	2.71017	5.62899
ZNF239	1.96257	10.7317				AC133485.2	1.8141	5.62431
PTTG1	2.10327	10.7277				LNX2	1.23403	5.62297
TRMU	1.30561	10.7276				KRT36	1.49212	5.61981
COL4A1	2.14627	10.7262				ABCG1	1.54465	5.61952
AC012442.1	2.0351	10.7316				AL035252.2	1.00928	5.61757
SALL4	4.55599	10.7227				AL139246.2	1.94812	5.61654
SMC4	1.73672	10.7205				CHAF1B	1.28893	5.6164
NOL6	1.51475	10.7196				TRIM10	1.84067	5.60502
FBXO5	1.57241	10.7194				SELP	1.48765	5.60314
PPM1G	1.1081	10.7185				SLC5A8	1.1568	5.58572
CDCA7	2.57396	10.7174				WTAPP1	3.36752	5.57753
HSPBAP1	1.21769	10.7166				AP000619.1	3.36752	5.57753
INTS14	1.09207	10.7165				PLCE1-AS1	1.47035	5.57536
TOP1MT	1.55519	10.7136				TUBB2B	1.71328	5.57408
TDP1	1.21944	10.7133				SUN1	1.17258	5.56946
PIGU	1.34641	10.7092				AC078845.1	1.43743	5.56044
ZNF146	1.26164	10.7073				PRR7-AS1	1.50677	5.56
TGDS	1.25985	10.7013				CEACAM3	1.8359	5.55179
NUFIP2	1.20871	10.6999				AC237221.2	1.06777	5.54385
SNHG4	2.12083	10.6968				LLGL2	1.58631	5.54246
CSTF1	1.11642	10.6965				AC023347.1	1.07443	5.52344
NUP43	1.26638	10.6954				TTK	1.43107	5.51991
SEPTIN11	1.46499	10.695				EIF2B4	1.43485	5.5174
NEK8	1.37417	10.6924				AC018685.2	1.40818	5.51315
RAE1	1.35961	10.6893				DCTN5	1.07853	5.50286
ACTR5	1.31918	10.6886				CSE1L	1.09648	5.4956
SET	1.11491	10.6876				AUNIP	2.71719	5.48899
CLK2	1.12676	10.6871				RNF128	1.70092	5.47903
AC108860.2	2.42065	10.6853				GFPT1	1.16088	5.47469
PAWR	1.30195	10.6813				LRRC6	1.66719	5.47019
CPSF6	1.16752	10.676				CELF2-DT	1.03309	5.46702
ZGRF1	1.83561	10.6742				SCIN	2.28932	5.46378
EBNA1BP2	1.09899	10.6711				SEH1L	1.099	5.4616
RHBDF2	1.75636	10.6693				LINC01633	2.02212	5.45973
CASK	1.52642	10.6557				THSD4-AS1	2.16493	5.45955
MITD1	1.08193	10.6548				ARL14	1.78877	5.45282
CHAF1B	1.71366	10.6525				CDH16	1.89777	5.44965
FCGR1A	2.7062	10.6521				CSTF3	1.8482	5.44918
TRNT1	1.0888	10.6519				PAM16	1.52312	5.43831
ANKRD10-IT1	2.0731	10.65				GLIS2	1.52312	5.43831
ZNF761	1.78324	10.6487				TGIF2-RAB5IF	1.47108	5.43515
HPRT1	1.28725	10.6433				RAB5IF	1.47108	5.43515
IVNS1ABP	1.4953	10.6432				PRPSAP2	1.65338	5.43
PRR7-AS1	2.33629	10.6429				AC090286.3	1.65338	5.43
TMEM44	1.51437	10.6419				FABP1	6.59348	5.42814
MAGOHB	1.15277	10.6322				OGDH	2.67316	5.42683
ATP6V1C1	1.30627	10.6314				PIGZ	1.28603	5.4262
TMPO-AS1	1.66246	10.6283				PRSS22	1.89746	5.425
KIF22	1.45403	10.6249				PSMC4	1.09754	5.42261
MISP	3.22825	10.6229				S100A14	4.68616	5.42028
NCAPD3	1.69791	10.6217				ALDH1L1-AS2	1.18434	5.4196
MLEC	1.54112	10.6202				AC100778.2	1.87042	5.41555
NDUFAF6	1.22265	10.6166				LIN7C	1.36831	5.41554
IKBIP	1.34884	10.6156				SPDL1	1.40748	5.41262
BAZ1A	1.23064	10.6142				DNAAF5	1.69293	5.3892
CCDC18	1.61703	10.6124				AL354919.1	1.04361	5.38852
MSTO1	1.27917	10.6092				LGR4	1.67793	5.38642
NR2C2AP	1.15375	10.6074				FAM122B	1.00551	5.37906
FBXO22	1.02586	10.603				ACPP	1.293	5.37407
PTCD1	1.33543	10.6012				CYP3A43	1.34951	5.37116
C12orf73	1.0758	10.5925				SRPK1	1.02839	5.3663
CELSR3	2.83471	10.5919				PYGL	1.0932	5.36245
DDX12P	2.13732	10.5905				ABHD12B	1.0932	5.36245
RP9	1.12618	10.5877				PTGIS	1.47673	5.35392
CHRNA1	3.40422	10.5911				TBC1D3P1-DHX40P1	1.58063	5.35293
THUMPD2	1.13996	10.5839				TBC1D3P1	1.58063	5.35293
RRP9	1.34937	10.5826				RASAL1	1.44864	5.35078
MTF2	1.15496	10.5772				KLLN	1.02331	5.35054
AC026271.1	1.45684	10.5746				MTRF1L	1.01547	5.3445
TOP1	1.19629	10.5742				AL080276.2	1.01547	5.3445
MAP3K21	2.21661	10.5662				RPS14	1.79037	5.33447
NLN	1.39921	10.5644				INSC	1.43009	5.3295
ARL6IP1	1.46979	10.564				C1QTNF1	1.5462	5.32783
ARFGAP1	1.32692	10.5608				SLC35E2A	1.6593	5.32335
UGGT1	1.1628	10.5589				CRLS1	1.31474	5.31699
SNHG15	1.3574	10.5557				AL035461.3	1.31474	5.31699
RELT	1.7332	10.5546				HEXA-AS1	1.55386	5.31276
CXCL16	1.78981	10.5523				RNASE12	1.05488	5.31003
WDR12	1.30972	10.5509				RNASE11	1.05488	5.31003
NAA15	1.24191	10.5507				AL163195.3	1.05488	5.31003
HUS1	1.09649	10.5493				AL163195.2	1.05488	5.31003
GART	1.28746	10.544				UTP4	1.02768	5.30681
MAP4K4	1.34811	10.5424				MRPL14	1.05542	5.30377
XPOT	1.46019	10.5412				GCLM	1.03957	5.30284
CLEC5A	3.0035	10.5412				GMFB	1.10382	5.30169
XRN2	1.27512	10.5411				NAV2-AS3	1.32838	5.30004
PLBD2	1.24686	10.5343				AGXT2	2.01175	5.29556
DENR	1.0514	10.528				AKR1C6P	1.95698	5.29546
NSUN2	1.3601	10.5255				LINC01213	1.3591	5.29524
TTC26	1.60882	10.5239				BX322234.2	2.00193	5.29485
NAA10	1.12497	10.5234				KDELR3	1.47704	5.29182
DTYMK	1.38643	10.5216				AL365436.2	1.79585	5.28886
MTG1	1.23619	10.5169				ZBTB45P2	2.30573	5.28523
GEMIN2	1.09185	10.5159				ZBTB45P1	2.30573	5.28523
PRR7	2.03341	10.5128				SLC17A3	1.17952	5.2801
PATL1	1.19096	10.5038				NUDT12	1.36962	5.27797
PDIA3	1.22226	10.4995				DUSP1	1.84961	5.27086
E2F6	1.13693	10.4972				AC022217.3	1.84961	5.27086
CENPW	1.76182	10.4945				LAMA1	1.17533	5.2595
DPP3	1.37578	10.4939				CSNK1A1	1.18575	5.24608
GTF2E1	1.11341	10.4937				AC021078.1	1.18575	5.24608
POLR1A	1.36901	10.4933				ARHGAP29-AS1	1.68697	5.24515
KRT8P12	1.47688	10.493				AC008415.1	2.09541	5.23162
LAMP3	2.68226	10.4928				SEMA4A	1.93107	5.2279
AL355488.1	2.23529	10.4907				S100A16	3.58692	5.22615
GMPS	1.27948	10.4869				ARL6IP1	1.56872	5.22112
SF3B3	1.28672	10.4869				TUBA1B	2.08752	5.21427
ARPC1B	1.5845	10.4846				PLA2G2A	5.46111	5.21179
SF3B4	1.00873	10.4818				AC120045.1	1.59922	5.21063
NR6A1	2.14782	10.4782				LEMD1-AS1	1.11919	5.21057
RNF149	1.03005	10.4777				LEMD1	1.11919	5.21057
DBF4B	1.56772	10.4724				TEDC1	1.95152	5.20638
AP005136.3	1.91103	10.4721				AL590822.1	1.61091	5.20214
AL162595.1	2.01589	10.4717				SOHLH1	1.40081	5.20142
CCT5	1.38995	10.4695				LINC01186	1.91817	5.20142
NPRL3	1.08473	10.469				ELAVL4	1.06133	5.19995
KCNJ14	1.95731	10.4684				CR381670.2	1.72217	5.19941
NOLC1	1.44054	10.4676				EHF	2.43155	5.19614
EPHB2	3.29639	10.4627				SLC52A3	1.89415	5.1955
NUP42	1.07439	10.4618				STK39	1.46005	5.19534
TRIM27	1.01519	10.4617				ZNF823	1.22357	5.19176
MTIF2	1.15081	10.4603				TBC1D5	1.5464	5.18959
ACTG1P3	1.86675	10.4604				AC104451.2	1.5464	5.18959
TMEM33	1.27316	10.4579				LCE3B	1.15578	5.18726
MSI2	1.35169	10.4528				MRPL18	1.41294	5.18218
BRI3BP	1.70539	10.4519				RUNDC1	1.07027	5.17947
CIT	1.73584	10.4483				NUDCD1	1.37552	5.17723
CNOT10	1.01571	10.4468				RND1	1.31672	5.177
PLEKHA8	1.3239	10.4401				SMC1A	1.41878	5.1721
DNAJC10	1.26425	10.4386				SDF4	1.04366	5.17052
E2F8	2.46413	10.437				LTO1	1.84264	5.16998
DCAF7	1.08632	10.4352				GDI1	2.73141	5.1659
F11R	1.56564	10.433				BMP2	1.92417	5.1647
AC083899.1	1.37775	10.431				PCYT2	1.0026	5.16469
LSM8	1.22428	10.4301				SHCBP1	1.57893	5.16367
GNL3	1.3565	10.4246				AC020763.1	1.71359	5.16222
AL451050.2	2.11597	10.4282				KRT32	1.25094	5.16166
FUBP1	1.12489	10.4218				CCN6	1.392	5.15922
SLC38A6	1.18391	10.415				PTGR2	1.41351	5.15828
ZNF587B	1.44806	10.411				PPP1R14D	2.21453	5.15489
POGLUT1	1.07784	10.4108				CPNE3	1.70946	5.14245
EED	1.11106	10.4102				CNGB3	1.70946	5.14245
THADA	1.15407	10.4095				SLC12A3	1.12683	5.14238
CLDN4	3.05847	10.4088				BRMS1	1.15222	5.14159
FOXP3	2.38772	10.4079				ZNF512	1.26462	5.1401
EIF3B	1.1785	10.4072				ZNF814	2.05884	5.13883
LCLAT1	1.3693	10.4058				AC010326.4	2.05884	5.13883
MFSD12	1.37574	10.4048				TBC1D3F	2.32328	5.13772
PTPN12	1.36431	10.4043				MYD88	1.24259	5.13227
CNOT11	1.05367	10.4018				KRTAP15-1	1.52939	5.12735
NT5C3A	1.35954	10.4003				SLC25A32	1.56846	5.12197
CDH3	3.38384	10.3963				ETS2	1.41616	5.12045
POLR3K	1.23511	10.3945				AP001042.1	1.41616	5.12045
PBX4	1.89565	10.3927				LINC00543	2.34597	5.1182
KLHDC4	1.17284	10.3902				AL117378.1	1.1303	5.11031
STRA6	4.02634	10.3888				AC099344.3	1.22709	5.1081
ETV6	1.08853	10.3849				DTNB	1.20454	5.10701
NUP35	1.14335	10.3832				KCNH4	1.42826	5.10518
COL5A2	2.40839	10.3825				NXPH3	1.17901	5.10412
TASOR2	1.32524	10.3806				AC006487.2	1.17901	5.10412
LYN	1.65948	10.3777				SDR16C5	3.30037	5.10254
SH2D2A	1.78946	10.3771				HEXIM2	2.38213	5.10209
GXYLT1	1.31671	10.3703				FAAH2	1.08987	5.09976
ATP5MC1P4	2.65337	10.3717				OAS1	2.06042	5.09891
AL157838.1	2.23536	10.3672				AC004551.1	2.06042	5.09891
ZNF473	1.38595	10.367				KCNJ11	1.67309	5.09332
MAK16	1.27525	10.3651				AC114291.1	1.39893	5.09123
HSP90AB2P	1.6956	10.3617				TNFRSF10A	1.53872	5.08292
NCAPD2	1.61753	10.3595				KCTD17	1.28946	5.07757
MRPS17	1.1418	10.3575				TUBGCP4	1.64273	5.07461
SNORD12B	2.5523	10.3692				AC009533.1	2.1954	5.07323
ENTPD6	1.48811	10.353				CRYBB2	1.72184	5.07258
AC125807.2	1.71732	10.3528				TMEM9B-AS1	1.30181	5.07222
ANAPC7	1.01025	10.3512				ZP4	1.56737	5.06631
TMEM68	1.27484	10.3496				AL359924.1	1.56737	5.06631
ARL6IP6	1.17851	10.3447				AC018495.1	1.37308	5.05151
CENPH	1.61373	10.3419				UPP1	1.564	5.04851
WDR46	1.08505	10.3399				KIAA0232	1.19855	5.04705
STK4	1.25685	10.3381				LINC00858	3.2031	5.04024
ZNF789	1.57985	10.3366				MRPL47	1.03493	5.03545
DDX27	1.36102	10.3355				LINC01493	1.33704	5.03413
ABL2	1.36541	10.3285				LIPH	2.09735	5.034
MCM6	1.46175	10.3273				SERAC1	1.34836	5.02836
UBFD1	1.29644	10.3263				LINC02163	4.27462	5.02472
FAAP24	1.44973	10.3259				TTLL1	1.91951	5.0237
ITGAX	2.35834	10.3224				TGIF2	1.19188	5.01527
GBAP1	1.54532	10.3213				SEC23B	1.02178	5.01299
JADE3	1.43356	10.3204				SPTLC1	1.24544	5.01181
NOX4	2.65301	10.3198				IL1B	2.3888	5.01057
PTCD3	1.17393	10.3179				LANCL1	1.36494	5.00917
MRPL47	1.11536	10.3114				SKA3	1.57319	5.00187
AL391244.2	1.6899	10.3111				LDLRAD3	1.69941	4.99321
RPAP3	1.12411	10.3097				AL050402.1	1.07302	4.99245
USP14	1.16048	10.3003				SLC45A3	1.30994	4.99085
SPATA13	1.59868	10.2999				ROMO1	1.04056	4.98744
ADAM10	1.37639	10.2985				NOX1	2.73308	4.98634
C12orf75	2.26382	10.2968				AC090371.2	1.42199	4.9848
NMI	1.36196	10.2939				CMTM2	1.17926	4.97915
TDG	1.1802	10.2924				AC010542.1	1.17926	4.97915
SUZ12	1.24487	10.292				PLUT	2.44769	4.9754
IGF2BP2	2.44547	10.2919				SLC13A3	1.2835	4.97494
MORC2	1.2396	10.2896				RABGEF1	1.66165	4.97436
TASP1	1.20432	10.2895				C11orf91	1.66193	4.97115
RABGGTB	1.12677	10.2887				AL049629.2	1.66193	4.97115
SLC12A7	1.81483	10.2872				HSPE1-MOB4	2.08578	4.9676
CDK2	1.3659	10.2848				HSPE1	2.08578	4.9676
NOC3L	1.39069	10.2846				HSPD1	2.08578	4.9676
HSP90AB3P	1.66714	10.278				RAPGEF5	1.69553	4.96756
RBM34	1.22085	10.2773				AC099792.1	1.56237	4.96442
PSMA1	1.02656	10.2771				AC126365.2	1.59134	4.96342
SNORA71C	2.51039	10.28				AC126365.1	1.59134	4.96342
AL138756.1	1.51136	10.2684				AGR2	1.81558	4.96202
PLXNA1	1.70384	10.2662				ZSWIM1	1.50231	4.96158
CDC25B	1.93868	10.2659				ASAH2B	2.54451	4.95962
PTBP3	1.42776	10.2656				HID1	1.56255	4.95887
AC100861.1	1.88052	10.264				MRE11	1.22203	4.95603
AL355802.3	2.06151	10.2554				CENPA	1.42262	4.954
EEF1E1	1.35998	10.2523				TSPAN8	2.62355	4.95257
SMS	1.21224	10.2514				CENPU	1.78602	4.9509
PFAS	1.4691	10.2501				ZNF239	1.11359	4.94083
CACYBP	1.21917	10.2499				RAB5A	1.5523	4.94044
POC1A	1.84575	10.2495				UBE2H	1.23708	4.93882
ZNF678	1.40511	10.2495				ARL8A	1.38028	4.93679
GCA	1.18819	10.2465				CXCR3	1.15671	4.93594
FKBP9	1.29504	10.2406				RASA1	1.23634	4.93494
FGFR4	2.96997	10.2398				PIAS1	2.44088	4.9318
CCT2	1.50036	10.2395				CALML4	2.44088	4.9318
TIMP1	1.95682	10.239				AC107871.1	2.44088	4.9318
PRKDC	1.68965	10.2354				CYP51A1	2.39143	4.93136
PHF20L1	1.11265	10.2338				AC000120.2	2.39143	4.93136
NFXL1	1.47612	10.2325				NIPSNAP2	1.03524	4.93036
FKTN	1.2724	10.2277				AC092647.5	1.03524	4.93036
NUP160	1.35959	10.2269				MDFI	1.34775	4.92746
FTSJ1	1.04711	10.2179				LINC01357	1.21429	4.92729
CDCA3	1.96161	10.2177				VPS54	1.3505	4.92647
MYO19	1.45591	10.2158				LRATD1	1.26076	4.9258
TAF4	1.34654	10.2126				ALDH3B1	2.09802	4.92534
FASTKD3	1.21079	10.2104				XPNPEP1	1.03736	4.92343
ADAP1	1.87296	10.2088				PFDN6	1.50045	4.92241
AC046143.1	1.54076	10.2061				JUP	1.78761	4.91034
SNX8	1.30584	10.2052				AC093382.1	1.86996	4.9075
AL034550.1	2.44125	10.2074				AC016866.1	1.80628	4.90662
SPRTN	1.0827	10.1984				HES1	1.60879	4.90637
FDXACB1	1.32676	10.1965				EZH2	1.30686	4.90615
SEC61A2	1.47193	10.1951				BMS1P14	1.00942	4.90603
ATAT1	1.37698	10.1933				WNT8A	1.10825	4.90201
LTV1	1.13214	10.1909				HOXA4	1.73401	4.89894
TMEM201	1.55787	10.1896				AC012158.1	1.90398	4.89634
SPRN	1.32982	10.1883				CCDC112	1.06409	4.89592
TGIF2	1.52113	10.1858				RPL38	1.12073	4.88964
BAZ1B	1.0469	10.1818				ACTN4	1.65381	4.88822
NSD2	1.51318	10.1798				TMEM168	1.32293	4.88508
PHF6	1.45754	10.1783				ELK4	1.35366	4.88236
EIF2S2	1.06575	10.1772				GALNT3	1.19345	4.87529
YWHAB	1.01561	10.1771				AP000919.1	1.89232	4.87465
NUFIP1	1.26355	10.1756				LINC00431	1.96794	4.87419
FMNL2	1.64108	10.1719				UQCRFS1	1.01331	4.87049
FAM122B	1.46117	10.1718				HR	1.34981	4.85849
RNASEH2A	1.52781	10.1694				INPPL1	1.22853	4.8582
TMED2-DT	1.54033	10.1657				TCF19	1.38856	4.85651
BRD9	1.05678	10.1656				POU5F1B	1.38856	4.85651
AJUBA	2.19203	10.1646				PCAT1	1.38856	4.85651
CCT3	1.1815	10.1636				CASC8	1.38856	4.85651
CPXM1	2.84334	10.1622				SYT11	1.07011	4.84253
EXOSC2	1.16201	10.162				NDEL1	1.25497	4.84051
ERI1	1.47208	10.1568				PSMB3	1.02563	4.83434
CCDC86	1.38619	10.1566				AC015909.4	1.05227	4.83274
PSME3	1.05994	10.1564				AC015909.1	1.05227	4.83274
ANKLE2	1.13633	10.1553				AC004817.5	1.09451	4.83103
ATP2A2	1.23003	10.1544				AC004817.1	1.09451	4.83103
PTGES3	1.09989	10.1539				BX119904.2	1.74477	4.82188
VCPIP1	1.17203	10.1535				KRTAP12-1	1.77327	4.82096
AC124944.2	2.13654	10.1556				AC026992.2	1.43162	4.81839
RAD18	1.36593	10.1527				AC026992.1	1.43162	4.81839
TAF2	1.25709	10.148				CHRNA5	1.86271	4.81662
CDH24	1.61091	10.1444				AC027228.2	1.86271	4.81662
TRIAP1	1.05036	10.1427				LINC02605	1.60802	4.81578
SMIM25	2.34431	10.1414				AC083837.1	1.60802	4.81578
TTC27	1.08325	10.141				AL356056.1	1.19661	4.81492
RBM12B	1.33544	10.1408				Z84486.1	1.29296	4.81404
HSP90B1	1.19037	10.1404				MRPS27	1.19958	4.81251
AP3M2	1.42975	10.1351				PLAC8L1	1.71769	4.8099
PLAU	2.29799	10.133				AL137100.3	1.21404	4.80913
BROX	1.05618	10.1277				PIWIL3	1.01231	4.80873
LSR	1.93918	10.1277				NME1-NME2	1.873	4.80548
ZNF217	1.61254	10.1272				NME1	1.873	4.80548
SETDB1	1.14252	10.1271				LINC01237	1.12424	4.80254
TNFRSF10A	1.65095	10.1255				CLASP2	1.45393	4.80217
NOM1	1.21887	10.1235				LINC02591	1.38752	4.80129
LOXL2	1.93768	10.1206				AC243772.3	1.38752	4.80129
PFDN2	1.07554	10.12				PEA15	1.02598	4.7977
LARP1	1.16457	10.1192				AL121987.2	1.02598	4.7977
BNIP3P11	2.41255	10.1211				RPARP-AS1	1.1645	4.79718
EPHB4	1.61909	10.1177				C10orf95	1.1645	4.79718
ANKEF1	1.58308	10.1154				AC068491.2	1.12698	4.79107
HSPA14	1.17616	10.1151				IMPA1	1.63831	4.7875
SRRT	1.09008	10.1118				CXorf38	2.05495	4.78677
CIAO2A	1.06891	10.1112				ZNF764	1.54043	4.78495
TYW5	1.09519	10.1099				SNRPF	1.4701	4.78178
ATP2C1	1.24179	10.1099				FAM183A	2.68725	4.78154
HOXA10	4.79279	10.1112				AC016903.2	1.2356	4.77796
CAPN10-DT	1.74936	10.1081				LCN15	1.44715	4.77546
MARS2	1.39158	10.1047				CLDN10-AS1	2.05233	4.76956
HSPH1	1.69264	10.1035				CLDN10	2.05233	4.76956
SLC6A6	1.6165	10.103				UHMK1	1.4361	4.76715
HELB	1.67117	10.0992				ERH	1.0174	4.76391
SNX5	1.14558	10.0974				AC011474.2	1.21147	4.76349
AC073333.1	2.04832	10.0994				AC011474.1	1.21147	4.76349
PPRC1	1.27782	10.0955				MAFTRR	1.44724	4.75642
PRPF4	1.17486	10.0954				LINC01229	1.44724	4.75642
RTEL1-TNFRSF6B	2.08191	10.0945				GNG12	1.43281	4.75251
PUS7L	1.28209	10.0945				PTPRU	1.30548	4.74833
TMEM87B	1.1903	10.0941				GPA33	1.0268	4.74546
CEP152	1.55425	10.0912				DUSP27	1.0268	4.74546
HDAC10	1.14556	10.0901				PPFIA1	1.60467	4.74532
SNRPF	1.29774	10.0901				AP000487.1	1.60467	4.74532
CD276	1.55836	10.0886				RARA-AS1	1.45304	4.74194
ACYP1	1.48397	10.0881				RICTOR	1.57241	4.73975
HOXC6	3.33072	10.0872				AOX2P	1.09857	4.73835
STX6	1.06141	10.0816				ZNF358	1.73327	4.73731
PAXIP1	1.19753	10.0814				WDR25	1.74908	4.7349
ODR4	1.12417	10.0788				AL135838.1	1.74908	4.7349
AC112777.1	2.39529	10.0794				AC012313.3	1.64968	4.72922
PRMT3	1.28796	10.078				A1BG-AS1	1.64968	4.72922
ZNF765	1.38802	10.0773				CKAP5	1.21538	4.72683
HOXB9	4.89363	10.0805				LINC01381	1.16391	4.72625
TRMT1	1.11926	10.0742				ABHD13	1.13377	4.7246
C19orf48	1.62663	10.0741				AL163952.1	2.17184	4.71761
MIS18A	1.43083	10.067				MINCR	1.10895	4.71694
R3HDM1	1.14574	10.0666				AC000120.1	1.61033	4.71489
ZSWIM4	1.56251	10.0654				ABCB11	2.68649	4.71343
NARS2	1.29523	10.063				RPS6KB1	1.51155	4.71288
CHD1L	1.0773	10.0621				AL024508.2	2.8677	4.71062
ONECUT2	3.93738	10.062				DDX41	1.42737	4.70856
DPM2	1.05594	10.0614				WWTR1-AS1	1.64343	4.70826
AC004241.3	1.8553	10.0596				WWTR1	1.64343	4.70826
C18orf54	1.66667	10.0577				CCNB1	2.33231	4.70622
LRRC58	1.21564	10.0561				OR56B1	1.63527	4.69891
RACGAP1	1.63905	10.0525				IDH1	1.00878	4.69803
TIMM17A	1.0122	10.0517				AC025183.3	1.5451	4.69672
THOC1	1.22899	10.0481				LINC00240	2.14538	4.69644
WDFY1	1.2246	10.0479				AL590062.1	2.14538	4.69644
RPF2	1.10836	10.0465				PHACTR2-AS1	1.02091	4.696
CXorf38	1.28396	10.0459				SEPTIN8	1.04281	4.69532
RNF114	1.09644	10.0443				CLDN16	1.1303	4.69525
ADAT2	1.67367	10.0443				NAA50	1.51975	4.679
RBM19	1.10072	10.0414				OXR1	1.35441	4.67845
USP43	2.27434	10.0399				AC117465.1	1.011	4.67682
TMEM62	1.35231	10.0336				FCN1	1.3961	4.67602
SRSF6	1.05521	10.0326				TRPM1	1.01784	4.67092
HNRNPU	1.07001	10.0286				LINC02244	2.59207	4.66936
ZNF799	1.21613	10.0269				GHRH	1.56188	4.66817
MET	2.30549	10.0255				SESN1	1.71413	4.66816
SLC35A2	1.31985	10.0218				GPR156	1.14472	4.66572
TBC1D24	1.29168	10.0212				CCDC162P	1.37502	4.6654
DHX33	1.20748	10.0212				RALA	1.73515	4.66412
MPZL1	1.03354	10.0197				EIF3CL	1.22487	4.66357
LY75	1.96674	10.0194				EIF3C	1.22487	4.66357
AL662797.2	1.84665	10.0235				AC145285.4	1.22487	4.66357
PTMAP8	1.61824	10.0167				ATP1A1-AS1	1.12199	4.65593
CENPQ	1.44539	10.0139				ATP1A1	1.12199	4.65593
TMEM39A	1.09604	10.0091				RIPK2	1.7778	4.65412
PYCR1	2.08073	10.0074				NGRN	3.39971	4.65122
HS2ST1	1.29695	10.0028				AC091167.6	3.39971	4.65122
SPOCD1	2.38622	10.0024				AC091167.1	3.39971	4.65122
ZNF107	1.47368	10.0016				FAM156B	1.68264	4.65069
SLC12A9	1.37832	9.99908				FAM156A	1.68264	4.65069
BBC3	1.80606	9.99627				STAB2	1.91579	4.64961
CCSAP	1.44024	9.99588				AC025265.1	1.91579	4.64961
ADAR	1.2528	9.99562				CALCOCO1	1.16128	4.64917
ZDHHC24	1.03743	9.99519				AC020891.2	2.44317	4.64573
PA2G4P4	1.41721	9.99088				Z97634.1	1.09106	4.64408
MCM7	1.72579	9.98882				NEIL3	1.62572	4.64142
CMTM1	1.63268	9.98734				FAM153CP	1.13059	4.64041
POLR2H	1.10645	9.98733				HSPBP1	1.12437	4.6382
ATAD3B	1.61672	9.98684				FOXK2	1.35261	4.63646
KRT18P4	1.82316	9.9875				TACSTD2	2.59056	4.63645
ATXN2L	1.20281	9.986				AP1M2	1.67616	4.63063
TCF3	1.40533	9.98028				TM4SF4	1.71227	4.62823
ZMYND19	1.23736	9.97976				ARF6	1.44558	4.62801
ACTR3B	1.27615	9.97881				MRPL10	1.29201	4.62757
PPP4R2	1.08757	9.97864				LINC02595	2.88829	4.6212
LINC01389	2.2265	9.98531				NUF2	1.45482	4.61937
TLCD1	2.09274	9.97625				OR2B6	2.32854	4.61767
CETP	2.09569	9.97471				LINC01695	1.72067	4.61049
WDYHV1	1.10446	9.97286				TMEM231P1	1.73603	4.59929
PTDSS1	1.19387	9.97272				PDZK1P1	1.84386	4.59912
DHX9	1.14274	9.97247				PDZK1	1.84386	4.59912
TRIM15	3.35235	9.97332				AC092168.3	1.22922	4.59807
GATC	1.06	9.96997				LINC00513	1.00472	4.59697
RANBP1	1.23306	9.96429				SCAF1	1.37772	4.59399
SLC8B1	1.21969	9.96253				NUSAP1	1.60005	4.59188
FRMD5	2.45439	9.96143				SYT5	1.24867	4.5914
ZNF280C	1.51368	9.95949				HNRNPF	1.01547	4.58987
ZNF887P	2.17508	9.96106				PHF24	1.1854	4.58983
NUP155	1.54625	9.95301				GFOD1	1.00817	4.58895
MC1R	1.82692	9.9525				AC078923.1	1.12409	4.58624
TAF5	1.12832	9.95				AC078820.2	1.12409	4.58624
SPAST	1.15106	9.9478				SUPT7L	1.12724	4.58309
CLCN5	1.75435	9.94605				RSU1P2	1.26494	4.58159
AP1S3	1.8765	9.94481				TBX1	1.56362	4.5798
ZNF138	1.20096	9.94382				CYP3A4	1.44429	4.57818
MFSD13A	1.38503	9.9438				ADORA1	1.1178	4.57794
RPN2	1.28844	9.94252				EVI5L	1.06058	4.57405
TBL2	1.11631	9.93926				TNFSF10	1.37682	4.56492
HNF4A	3.36148	9.93711				GLO1	1.48586	4.56038
NFKBIE	1.52812	9.93617				LINC01816	1.50258	4.54391
SERINC5	1.52702	9.93563				FAR2P4	2.74996	4.53936
UBE2SP1	1.94585	9.93506				MFSD5	1.14511	4.5385
AARSD1	1.25599	9.93472				PKN2	1.31251	4.53725
HNF1A	2.94486	9.92686				CENPW	2.0724	4.53191
SKP2	1.75205	9.92569				SOWAHC	1.34221	4.53172
ATP13A1	1.17044	9.92202				LURAP1L-AS1	1.52363	4.52772
DNMT3B	2.44155	9.91764				LURAP1L	1.52363	4.52772
HSPE1P3	1.71659	9.91749				MBD3	1.07893	4.52305
NONO	1.01732	9.91454				AC104187.1	1.03631	4.52274
RMI1	1.32267	9.91265				FMR1-AS1	1.54834	4.52245
DNAJB11	1.19686	9.9116				OTULIN	1.36833	4.52242
MFHAS1	1.52554	9.90988				KRTAP19-7	1.03921	4.52062
LINC01123	1.99429	9.90983				GABARAPL1	1.22702	4.52021
POLE3	1.00373	9.90888				CAPN8	2.09837	4.51862
THY1	2.23099	9.90556				AC006262.2	1.47631	4.51733
U62317.2	1.42565	9.90323				LINC01151	1.45796	4.51348
AP000695.1	2.56613	9.90268				AC100872.2	1.45796	4.51348
RDM1	2.47925	9.90194				TLDC2	2.07363	4.50919
ILF3	1.12913	9.89009				CLMAT3	1.8251	4.5074
CEP78	1.3256	9.88974				PTRH2	1.63704	4.49708
NAA40	1.28444	9.88632				PRCP	1.14531	4.4962
SHTN1	1.4291	9.88607				DDIAS	1.14531	4.4962
BARD1	1.38817	9.8849				ABO	1.28581	4.48849
NANP	1.3514	9.87702				AL139042.1	1.07265	4.48651
PIF1	1.77391	9.87203				RPL30	1.05003	4.48571
ZNF131	1.13208	9.87185				LINC02346	1.1983	4.48554
CARMIL1	1.53463	9.86993				TMCC2	1.18083	4.48415
SNRPEP2	1.70449	9.87042				LINC01806	1.68727	4.484
C4orf46	1.32689	9.86221				LINC00659	2.61407	4.4832
DLEU1	1.28284	9.8583				POTEM	1.52381	4.48309
PRIM1	1.51265	9.85812				BEST4	1.10691	4.47964
UMPS	1.11171	9.85634				AP005233.2	2.7696	4.479
NLK	1.06835	9.8557				LINC01226	1.04459	4.47745
LLGL2	1.90939	9.8556				LDC1P	1.04459	4.47745
METTL21A	1.10153	9.85526				LINC00474	1.13908	4.47519
FAF2	1.05445	9.85398				ZNF286A	1.49045	4.47329
EXOSC9	1.06798	9.85314				UBE2S	1.49045	4.47329
HNRNPA1P10	1.5575	9.85301				AC005324.4	1.49045	4.47329
AC073283.1	2.73384	9.86685				MX1	1.96577	4.47142
AL078621.1	1.69413	9.85419				AP001610.2	1.96577	4.47142
RAD21	1.3057	9.85016				CORO2B	2.00459	4.47011
ZNF587	1.38794	9.84636				C9orf153	2.45523	4.46922
EXOC6	1.27757	9.84608				CKS2	1.49047	4.46841
HNRNPF	1.03002	9.8428				ARHGAP11A	1.80671	4.46804
HMGA1P2	1.6508	9.84129				AC123768.5	1.80671	4.46804
APLN	2.9891	9.83913				TOR1B	1.32507	4.4664
AC018904.1	1.46649	9.83324				NEK8	1.67827	4.46465
SLF1	1.21831	9.83121				AC010761.2	1.67827	4.46465
ITPA	1.12413	9.82843				PCLAF	2.21418	4.45783
HSPA5	1.13385	9.82486				AC087632.2	2.21418	4.45783
IRF3	1.06435	9.8244				LINC01133	1.05658	4.45662
YRDC	1.08262	9.82407				AC007528.1	1.305	4.45575
ORC5	1.12427	9.8227				CBX3	1.20877	4.45427
VARS1	1.33347	9.8185				AC108868.2	1.12101	4.45212
POGK	1.13159	9.81811				AC108868.1	1.12101	4.45212
FANCC	1.23399	9.81708				LINC01564	4.12891	4.45188
LIPG	2.7082	9.81688				CYP2C18	2.89994	4.45186
USP31	1.43041	9.81219				AL583836.1	2.89994	4.45186
VPS9D1-AS1	2.49891	9.80852				UROC1	1.53613	4.4504
AL031985.3	1.51308	9.80819				MED13	1.08297	4.44566
XPO6	1.09792	9.80712				AL513210.1	1.09719	4.44548
AC004943.2	1.44103	9.80631				P4HTM	1.34525	4.44037
FUS	1.0293	9.80496				FERMT1	1.44803	4.43493
HAGHL	2.20118	9.80488				HCG9	2.49414	4.42816
WDR3	1.32046	9.80096				GLUD1P3	1.12807	4.42567
DESI2	1.13709	9.80068				ALDOA	1.48052	4.42366
RAD1	1.09217	9.7998				AC093512.2	1.48052	4.42366
TMC6	1.59733	9.79612				APOC3	2.3575	4.41723
SLC12A9-AS1	1.93244	9.79719				AKR1B15	1.88468	4.41572
AC092910.3	1.58825	9.7935				IGFBP7-AS1	1.67158	4.41459
PPA1	1.19028	9.79281				AC105390.1	1.67158	4.41459
CEP72	1.91114	9.79274				FANCB	1.88598	4.41323
MFSD14B	1.04535	9.79248				LINC02404	5.28299	4.41255
EARS2	1.19639	9.79236				AC009630.2	2.10472	4.4094
LBX2-AS1	1.69367	9.79188				LARS	1.13766	4.40369
GAR1	1.11834	9.78916				RPL39	1.88174	4.4034
RPL7L1	1.17411	9.78816				CPS1	1.27695	4.39375
CCNE2	1.76839	9.78758				TTTY7B	1.49561	4.39285
FNDC3B	1.33738	9.78714				TTTY7	1.49561	4.39285
MYB	2.90361	9.78305				AC093525.4	1.13796	4.38857
RFC5	1.24149	9.78233				RAB7A	1.15725	4.38833
FOXN2	1.28568	9.78145				SEC23A-AS1	1.22547	4.38461
SFMBT1	1.37446	9.77885				ARHGAP32	2.61498	4.38414
SLC17A9	2.66933	9.77757				PLD2	1.14117	4.38196
ISG20L2	1.06172	9.77701				TOB1	2.23553	4.38182
MACC1	2.57974	9.77636				AC010336.8	1.28155	4.38022
PPIAP6	1.52109	9.77538				MNS1	1.99736	4.379
UAP1L1	1.8098	9.77194				UNC13B	1.28585	4.37801
BMP8A	2.37103	9.77037				SLC25A21	1.16551	4.37547
PYCR3	1.56254	9.7694				CENPN	1.91475	4.37479
IL11	3.89481	9.7692				AC092718.2	1.91475	4.37479
TUG1	1.15067	9.76641				ABCD3	1.56813	4.37276
SNRPB	1.26029	9.76352				GRTP1	1.13699	4.37234
C12orf66	1.18395	9.75933				WDR27	1.35122	4.37051
ANKZF1	1.05908	9.75893				CDK1	1.95564	4.37008
FBXO45	1.27384	9.75879				CDC45	2.19441	4.36948
CENPS	1.42703	9.75855				LINC02585	1.96956	4.3651
AL691482.4	2.76269	9.75781				CLBA1	1.51526	4.36258
PTK2	1.09851	9.75506				LINC02428	1.10956	4.36248
HMGXB3	1.13369	9.75468				FEM1C	1.77851	4.36191
ZNF92	1.35058	9.75321				RBMS3-AS2	1.04647	4.36177
RRN3	1.13821	9.7504				PSAT1	1.20961	4.35516
SMPD4	1.14568	9.74844				CXCR5	1.30403	4.35479
MLH3	1.22635	9.74749				AP004609.1	1.30403	4.35479
DDX52	1.18409	9.7472				WDR20	1.07476	4.35144
SMARCD1	1.07515	9.74332				GREB1L	1.52087	4.34251
LRPPRC	1.24385	9.74181				AC015878.2	1.52087	4.34251
RIOK1	1.09013	9.74055				CSTF2	1.88605	4.33909
RBM25	1.07745	9.74041				ADAM9	1.73262	4.33667
CANX	1.09625	9.73604				MICALL2	1.28889	4.33594
GMFB	1.19636	9.73386				SCAT2	1.92964	4.33543
UTP23	1.05495	9.73318				AQP9	1.37395	4.33251
KHDC4	1.27679	9.73073				SOCS6	1.90725	4.33243
PDE7A	1.37818	9.72623				BAIAP2L1	1.43034	4.32805
AL390728.4	1.48893	9.72339				SCN1A-AS1	1.30413	4.32788
AC009041.3	2.18195	9.72503				SCN1A	1.30413	4.32788
CXCL1	3.56966	9.71458				AADACL2-AS1	2.77221	4.32699
PMS1	1.15551	9.70847				AADAC	2.77221	4.32699
GTF2H3	1.14307	9.7037				GLDC	1.49963	4.32595
AL356653.1	1.89622	9.70101				HEPHL1	1.49213	4.32534
ZNF26	1.35702	9.69969				UNC93A	1.2283	4.32518
SNHG20	1.28316	9.69915				DYSF	1.38357	4.32181
CKLF	1.41312	9.69852				NCLN	2.45888	4.32172
ZC3H3	1.19963	9.69851				U2AF2	1.3276	4.31846
HDGF	1.18798	9.69716				AC008735.2	1.3276	4.31846
LRR1	1.0828	9.69601				AIMP2	1.12607	4.31721
PRPF3	1.1056	9.6943				APOOL	1.05903	4.30652
PIMREG	2.06645	9.6943				GIPC2	1.62537	4.30416
EFNA4	1.50848	9.69357				TMIGD3	1.5294	4.29975
AL031123.2	1.97775	9.69098				PREP	1.0737	4.29943
FCGR3A	2.8294	9.6886				CENPI	2.10007	4.29326
DPY19L1P1	1.49782	9.68581				CYP4F26P	1.83022	4.28779
MRM1	1.3527	9.68165				AL390726.5	1.83022	4.28779
NUP188	1.32814	9.68071				AL390726.4	1.83022	4.28779
DHX15	1.14879	9.68019				AL390726.3	1.83022	4.28779
EXOSC8	1.1429	9.67885				PTK7	1.11478	4.28641
ALG10	1.40646	9.67818				POTEF	1.8029	4.28632
AC125257.1	1.4255	9.67625				AC018865.1	1.8029	4.28632
PLA2G15	1.24261	9.67495				MRPL40	1.48856	4.28462
IKBKE	1.59454	9.67275				FAT1	1.7698	4.28146
IL4I1	2.49741	9.67163				LRRFIP1	1.17564	4.27889
PSME4	1.18139	9.66941				C1orf68	1.34011	4.27175
UTP4	1.10157	9.66751				SLC22A3	1.64037	4.26938
SNRPB2	1.15434	9.66488				LINC00973	1.63793	4.26928
RAN	1.08658	9.65785				AC091212.1	1.63793	4.26928
SUPT16H	1.19959	9.65123				ULBP1	1.42911	4.26823
AC002116.2	1.73622	9.65077				AC008125.1	1.07448	4.26729
SUSD1	1.43449	9.64792				ADGRD2	1.84665	4.26681
MRRF	1.07326	9.64668				PBRM1	1.14653	4.26483
LINC01232	1.66108	9.6457				RLBP1	1.8218	4.26405
ANKRD61	1.85643	9.64478				RNF148	1.57922	4.26329
DENND4B	1.21148	9.64009				HKDC1	1.03289	4.26255
RPIA	1.25142	9.63663				BTNL3	2.04319	4.26246
PGAM5	1.31946	9.63612				UBE2T	1.86417	4.26242
RCCD1	1.32796	9.63535				LARGE-AS1	1.42293	4.26128
CCDC77	1.234	9.63304				AC010485.1	1.60763	4.26031
Z94721.1	2.20555	9.63673				ASTL	1.5125	4.25928
CMTM8	1.50457	9.63182				ADAM10	1.05106	4.25654
HDAC2	1.06196	9.62708				AC105133.1	1.15077	4.25464
SAAL1	1.10735	9.62613				RPN1	1.0092	4.2541
SRM	1.13473	9.62559				ZP2	1.24343	4.25279
COL11A1	5.2038	9.62606				AF001550.1	1.24343	4.25279
DPM1	1.04671	9.6171				AEBP1	2.2444	4.25241
BICD1	1.56077	9.61379				FAM131A	1.28657	4.25239
FEZF1-AS1	5.38398	9.63452				PXMP4	1.03074	4.25235
AC007996.1	2.00083	9.61045				CD99P1	1.01675	4.24911
C1orf74	1.29957	9.60947				ANAPC7	1.01151	4.24833
LLPH	1.05476	9.60548				LINC01194	1.12044	4.24645
CPNE1	1.40169	9.60373				E4F1	1.43816	4.24086
AL928654.4	1.79459	9.60361				LIN9	1.90991	4.23824
THEM6	1.63797	9.60354				ADORA2B	1.01446	4.23661
TNFRSF9	2.40469	9.60282				WLS	2.1462	4.23302
YEATS2	1.32303	9.60181				GNG12-AS1	2.1462	4.23302
UHMK1	1.32316	9.60113				AL096794.1	1.14653	4.23175
WDR36	1.24498	9.59988				CYP4F12	2.18751	4.22853
POLE	1.45389	9.59964				PDZD8	2.55979	4.22294
SNORA71B	2.14453	9.59971				AC124944.2	1.64967	4.21868
ABCF1	1.01176	9.59663				AC024937.3	1.64967	4.21868
HAUS2	1.12571	9.59563				ITPRIPL1	1.53821	4.21648
AC007255.1	2.30493	9.59702				TMC5	1.07798	4.2117
HMGB1P5	1.55524	9.59401				AC130456.3	1.07798	4.2117
TEPSIN	1.08825	9.59151				AC006333.2	1.18853	4.20968
MRPL50	1.03631	9.59037				AGPAT5	1.70917	4.20921
TRIM31-AS1	2.72975	9.59265				SMARCD3	1.60524	4.20784
C1GALT1C1	1.01893	9.58473				TMEM68	1.12164	4.2068
XPNPEP3	1.16071	9.58416				CASC9	3.21228	4.20659
PLEKHG4	2.59251	9.58318				PRR27	1.04091	4.20512
POMP	1.01693	9.58303				TRIM5	1.74064	4.20509
GAD1	4.14612	9.58223				RFX2	1.3352	4.20107
ANKRD10	1.31857	9.5811				SPICE1	1.05241	4.20076
TBL1XR1	1.3207	9.57896				AC112128.1	1.05241	4.20076
PPAN	1.2186	9.57776				NRIP1	1.0258	4.19626
AL390728.6	1.68623	9.577				SNX16	1.11478	4.19621
H2AZP3	1.66746	9.57769				LINC02629	2.54323	4.19557
E2F5	1.39956	9.57478				HMBS	1.12469	4.19394
GAS2L3	1.75397	9.56653				OR4D11	1.13309	4.19156
UBE2D1	1.00803	9.56649				SLC16A1	1.9738	4.19074
PRDX3P2	1.69537	9.56423				FAM13A	1.79471	4.19004
SSRP1	1.08237	9.562				AP000808.1	1.22294	4.18683
AC009690.2	1.36525	9.56101				FOXP1-AS1	1.62332	4.1865
HMGN1	1.04442	9.56058				UPK3A	1.86383	4.18574
G2E3	1.21359	9.55869				SLC25A34-AS1	1.35951	4.18547
RRP1B	1.22161	9.55839				AP1S3	1.54859	4.18108
SLBP	1.12514	9.55808				AC093884.1	1.54859	4.18108
XRCC3	1.30951	9.55505				AC027601.6	1.2502	4.17678
PRAG1	1.7227	9.55471				TCIRG1	1.13153	4.17183
ZC3H8	1.14993	9.55448				KIF20A	2.03248	4.17155
VDAC1P8	1.49759	9.54897				HSD17B3	2.06786	4.17136
RSKR	1.80203	9.54619				C1GALT1	1.45067	4.1671
FAM81A	2.20767	9.54412				JUND	1.29789	4.16604
DDX47	1.39603	9.54339				SEC14L2	1.26418	4.15879
STAMBPL1	1.62917	9.54274				RNF215	1.26418	4.15879
EDEM2	1.11164	9.54144				AC004832.3	1.26418	4.15879
BRMS1	1.08205	9.53949				BCL2L15	1.9469	4.15654
SNX25P1	2.21634	9.53837				AP4B1-AS1	1.9469	4.15654
LINC01943	2.00956	9.53557				DACT2	1.65296	4.15296
KCTD13	1.14441	9.53437				AL606970.1	1.65296	4.15296
AC090181.2	2.2698	9.53384				LHX9	1.1508	4.14835
CHML	1.75321	9.533				CR589904.2	1.64188	4.14708
AGMAT	2.4289	9.5325				PLSCR5	1.08199	4.14602
KIF9	1.11539	9.53227				AL590302.2	1.13414	4.14224
TATDN1	1.14131	9.53223				AL590302.1	1.13414	4.14224
DCLRE1C	1.13605	9.53074				HTATIP2	1.25865	4.14006
RPE	1.01413	9.52937				AL445363.2	1.31948	4.13714
MSANTD3	1.03915	9.52823				AL445363.1	1.31948	4.13714
AC073073.2	1.38187	9.52775				FAM27E5	1.19069	4.13448
AC092171.4	2.03951	9.53009				YBX2	1.14497	4.13182
KRT18P5	1.74066	9.52064				CXCL8	2.78291	4.12757
LAMC2	2.7222	9.52041				ADGRG7	1.80894	4.12557
NEMP1	1.54823	9.52012				CFTR	2.60328	4.12436
SNHG1	1.56261	9.51909				AC011891.2	2.26378	4.1185
DPAGT1	1.032	9.5167				GINS4	2.12515	4.1175
GNL3L	1.15841	9.51314				AC009630.1	2.12515	4.1175
PUM3	1.35089	9.513				COL16A1	1.33165	4.11294
P4HA1	1.54191	9.51066				RBIS	1.1261	4.11032
C2	2.21243	9.51061				TAS1R1	1.42824	4.11006
TFDP1	1.21402	9.50971				SLC35G1	1.90663	4.10938
NUP58	1.28168	9.50929				TMEM250	1.5083	4.10923
AMMECR1	1.39523	9.50768				ALOX12	1.50019	4.10896
BAG4	1.25652	9.50731				FGFBP1	6.24926	4.10682
RANGAP1	1.14946	9.50715				CT70	1.01365	4.10633
Z98884.2	1.89066	9.50316				FOCAD	1.21808	4.10439
GLA	1.20067	9.50291				DPY19L1P2	1.54892	4.09995
EPRS1	1.16175	9.50122				CCR2	1.52634	4.09788
NOP16	1.14589	9.50096				TBX3	1.32601	4.09603
MELTF	2.78985	9.50078				PRRG4	1.87662	4.09027
TPM3P9	1.70284	9.49583				LINC01040	1.31472	4.09021
PARP1	1.18495	9.48669				TEKT1	1.03207	4.09003
STT3A	1.05488	9.48158				PHYKPL	1.19849	4.08954
POLA1	1.34605	9.4792				HNRNPAB	1.19849	4.08954
AC007038.1	1.86874	9.47915				A1CF	1.44219	4.08722
ZNF443	1.29663	9.4789				PCSK5	1.56686	4.08514
C2CD4D	2.02556	9.47754				MSH5-SAPCD1	1.3299	4.08469
ANAPC1	1.3771	9.47373				MSH5	1.3299	4.08469
CBX8	1.51079	9.47292				GNA15	1.44319	4.08167
SPDYE3	1.15912	9.47266				SAMD13	1.12795	4.08135
LRRC59	1.15647	9.4711				PPP4R1	1.19519	4.08114
MELTF-AS1	1.73711	9.47102				ELOVL7	1.39299	4.07971
HSH2D	1.8373	9.47101				NAB2	1.36126	4.07723
FERMT1	2.35705	9.46888				NFE2L3	1.77268	4.0762
C1orf109	1.08142	9.46685				VHL	1.4593	4.07593
SUV39H1	1.34925	9.46678				MPP5	1.4457	4.0749
AGPS	1.12765	9.46442				LINC00408	1.18275	4.07285
AC073957.3	2.177	9.46436				NEDD9	1.50034	4.07215
HAUS6	1.4379	9.46426				AL139807.1	1.50034	4.07215
ADAM8	2.15547	9.46262				BMP10	1.42842	4.06543
POLD1	1.61881	9.46146				NAT1	1.37823	4.06267
DTX4	1.71701	9.46071				SIK2	1.06061	4.05802
AC010973.2	1.54664	9.46039				LINC02577	1.43586	4.05731
HCG18	1.17867	9.45928				PATL2	1.0439	4.05639
AL121832.3	2.31892	9.45973				HIC2	1.15007	4.05113
NCLP1	1.86199	9.4585				AC136475.1	1.05823	4.04899
THOC6	1.06214	9.45692				CLCN4	1.39667	4.04828
EEF1AKNMT	1.06996	9.45648				ASB4	2.11319	4.04675
ESRP1	2.21269	9.45628				URB2	1.17874	4.04652
STK31	3.30821	9.45722				FAM222A-AS1	1.10978	4.04499
TARS2	1.07753	9.45429				FAM222A	1.10978	4.04499
OSGIN2	1.17874	9.44993				NDFIP2	2.03574	4.04276
TSEN54	1.22142	9.44895				LINC00445	1.27685	4.04223
DROSHA	1.11484	9.44732				AC099328.2	1.23775	4.04039
RPGR	1.19417	9.44728				LINC02189	1.3183	4.04032
SLC30A6	1.04181	9.44397				RAET1E	1.62947	4.03903
NRAS	1.23105	9.44271				AF127577.4	1.26774	4.03781
TFAM	1.08431	9.43935				SPRTN	1.2286	4.03603
CEP85	1.48741	9.43836				C10orf88	1.37847	4.03597
RXYLT1	1.05618	9.43466				AC126474.1	1.06679	4.02914
STIP1	1.20226	9.43438				CKAP2	1.3937	4.02696
POLD3	1.49032	9.43274				KPNA2	1.1701	4.02471
AATF	1.1484	9.43031				PAH	1.2242	4.01679
AGO2	1.40847	9.42931				LINC00929	1.17883	4.01295
GOLT1B	1.17369	9.42759				HID1-AS1	1.84723	4.00797
NSUN5P1	1.55921	9.42715				LINC01757	1.28515	3.99764
KIAA1841	1.29463	9.42471				AKR1C3	1.13014	3.99687
SNHG12	1.45134	9.42395				CHL1	1.13067	3.99455
SMG7	1.07242	9.42301				TPRG1-AS1	1.29728	3.99384
KIF12	3.12245	9.42293				LINC02645	1.47254	3.99317
NBN	1.21054	9.42045				PKP2	2.07272	3.99154
RPRD1B	1.17935	9.41817				STRADB	1.16572	3.98422
NUP93	1.05746	9.415				SPATA6	1.16572	3.98422
CDK13	1.00562	9.40708				AL357832.1	1.47742	3.98036
CRNKL1	1.10081	9.40639				OR2S2	1.06642	3.98014
CHSY3	1.94235	9.40568				LINC01502	1.28207	3.9767
CYP4A22-AS1	2.70169	9.41444				PLP2	1.14282	3.97654
FBXL6	1.49587	9.39289				FHAD1	1.28227	3.96927
CCT8	1.057	9.39215				AL031283.3	1.28227	3.96927
LEO1	1.05187	9.38917				AL031283.2	1.28227	3.96927
C1GALT1	1.32398	9.38613				TRRAP	1.01133	3.96425
HKDC1	3.5795	9.38275				SMURF1	1.01133	3.96425
ADNP	1.18679	9.38065				KIF5B	1.52674	3.96397
RCN1	1.50917	9.38043				AP003110.1	1.10582	3.96232
TRIM10	2.65115	9.38129				CDKN2B	1.98752	3.96102
CKLF-CMTM1	1.7184	9.37442				LINC01730	2.13869	3.95912
THNSL1	1.44208	9.37289				AL109804.1	2.13869	3.95912
ABRACL	1.47402	9.37202				FAM83D	1.81498	3.95792
MRPL13	1.14994	9.36982				RIOK3	1.96605	3.95665
WDR5	1.12991	9.36959				ARHGAP45	1.20103	3.95541
TSPAN13	1.78281	9.36803				KIF13A	2.05278	3.95473
TMEM209	1.12007	9.36629				BCAP31	1.11439	3.94836
RBBP8	1.37174	9.36123				GAPDHP72	1.45022	3.94795
CCDC137	1.13557	9.36091				Z92544.2	1.40634	3.94604
SMC3	1.17266	9.36055				LINC01205	1.68602	3.94581
MEX3A	2.53348	9.35958				KIF18A	1.77735	3.93716
SFT2D2	1.11316	9.35807				DNAJC15	1.15615	3.93489
TRAM1	1.16038	9.35567				ASB13	1.18551	3.93085
TIGAR	1.18454	9.35368				THSD4	1.43765	3.93042
FANCM	1.389	9.34977				AC064799.2	1.43765	3.93042
PLEKHA8P1	1.26468	9.34859				VAPA	1.26689	3.92967
NLE1	1.19697	9.3458				AC098820.1	1.06844	3.92961
SPP1	3.79933	9.34517				NAA20	1.12916	3.92949
OTULIN	1.18916	9.33972				FLVCR1	1.32792	3.92937
MRPL3P1	1.62135	9.33841				MSMO1	1.58568	3.92716
AC112497.2	1.35281	9.33659				CYB5B	1.72165	3.92678
TRUB1	1.0525	9.3356				SMIM12	1.40373	3.92666
SEZ6L2	2.25977	9.33382				GJB3	1.40373	3.92666
AC010326.4	1.44863	9.33249				AL121988.1	1.40373	3.92666
ZNF697	1.53576	9.33102				LINC01094	1.36476	3.92615
TUT1	1.02386	9.32971				AC021752.1	1.21193	3.92453
PPIAP13	1.70019	9.32984				GMPS	1.25798	3.92439
GDPD5	2.15097	9.32589				NOTCH4	1.09511	3.92036
AC069282.1	1.69563	9.32564				TOP2A	2.61018	3.92014
CAPRIN1	1.15248	9.32526				CGA	1.64446	3.91675
GINS2	1.91192	9.32436				KRT73-AS1	1.31976	3.91132
RCN2	1.09934	9.32392				KRT73	1.31976	3.91132
OTUD6B	1.34943	9.32245				ZSCAN10	1.22277	3.90897
KRT80	3.80185	9.32194				CLDN14	1.16108	3.90842
MPHOSPH9	1.30793	9.32108				CCNE1	1.60266	3.90666
MCM3AP-AS1	1.36307	9.32031				UBL7-AS1	2.17542	3.90049
IFT80	1.32329	9.31949				KLF5	1.30863	3.89609
SFXN4	1.02316	9.31912				MKI67	1.60298	3.89377
SMARCC1	1.17536	9.31795				CNR2	1.09505	3.88901
ZNF165	1.53442	9.31463				AL591848.2	2.14525	3.88792
PPFIA1	1.24806	9.31216				ALAS2	1.28527	3.88738
STAT1	1.74096	9.31047				AC123768.1	1.15275	3.88681
GPAT4	1.04467	9.30994				TEAD1	1.67465	3.88327
RNFT1	1.17884	9.30922				NUDT13	1.83637	3.88264
HNF1A-AS1	3.13088	9.30801				AC016394.2	1.83637	3.88264
HMBS	1.24952	9.30721				CCN4	1.17067	3.88199
FASTKD1	1.19123	9.30685				C12orf50	1.3435	3.88058
FAM86C1	1.14616	9.29921				PTPN11	1.11805	3.87921
AP000487.1	1.5019	9.29792				HSD17B2	2.4744	3.87666
AL355802.1	1.22871	9.29338				AC092142.1	2.4744	3.87666
GMNN	1.45359	9.29204				AL023754.1	1.08367	3.87635
TEX10	1.09296	9.28996				AC005998.1	1.09614	3.87461
HEXB	1.07454	9.28734				SEMG1	1.86683	3.87415
DCLRE1A	1.38464	9.28458				GLCCI1	1.13539	3.87293
BCAP31	1.05428	9.28299				AC006042.2	1.13539	3.87293
RPL23AP95	1.71347	9.28757				AC012150.1	2.53073	3.87252
AC007731.2	1.89771	9.27999				FABP2	4.5569	3.87157
CBX2	2.79518	9.27827				ZNF215	1.38531	3.87112
LINC01094	2.07062	9.27673				EFNB3	1.31096	3.87077
TMEM123	1.16133	9.27515				KIF20B	2.706	3.8704
GFM1	1.10327	9.27462				AC021915.1	1.21628	3.86874
LINC01979	2.63781	9.2764				ABHD2	1.31004	3.8683
TPP2	1.13715	9.27413				CCDC154	1.30761	3.86791
LEF1	1.94366	9.27266				PON2	1.83789	3.86774
CLMN	1.53917	9.27083				NAALADL1	1.12464	3.86307
MTHFD1	1.21641	9.26949				FP326651.1	1.56856	3.85645
ZBED4	1.24952	9.26906				FAM27E3	1.56856	3.85645
ZNF692	1.16554	9.26609				FAM27C	1.56856	3.85645
SLC26A6	1.53776	9.26384				WRAP53	2.01399	3.85623
FAM120A	1.02631	9.2631				TP53	2.01399	3.85623
GNPNAT1	1.34397	9.25748				CSF2	2.01417	3.85159
NEDD1	1.16515	9.25693				WDR7-OT1	1.15943	3.851
HPS3	1.25527	9.25639				WDR7	1.15943	3.851
WDR90	1.66537	9.25326				HMCN1	1.21999	3.84863
PRR19	2.13336	9.251				C3orf52	1.09415	3.84652
PTMAP9	1.30292	9.25049				ARHGAP1	1.12764	3.84488
PDCL3P5	1.593	9.24932				TIGD3	1.14566	3.84417
RHPN2	2.28042	9.24523				ZFP62	1.38994	3.84044
HMGA1	1.85684	9.24183				IRX1	1.18921	3.83754
NUDT15	1.17974	9.24125				AC016595.1	1.18921	3.83754
CDK5RAP3	1.05821	9.24046				KNG1	1.01453	3.83577
TMEM182	1.31116	9.23823				AC068631.1	1.01453	3.83577
CEP95	1.18246	9.23656				C4orf33	1.12813	3.83421
HSPE1P2	1.49709	9.23551				LY6G6C	1.11854	3.83271
ZFP64	1.09182	9.2333				CYP2J2	2.36468	3.83231
TNS3	1.41295	9.23139				LINC02832	1.12221	3.83179
MYO7A	1.91735	9.2289				CRYM-AS1	1.13016	3.82866
ZNF670	1.28861	9.22502				LINC00668	2.16085	3.82798
ARHGEF1	1.19843	9.22454				NONO	1.11169	3.8226
ARPC3P1	1.19055	9.22273				SSX7	1.43234	3.81899
FNDC1	3.80449	9.22126				AC135782.2	1.5356	3.81859
ATP2A1	2.0314	9.22059				AC087564.1	1.2976	3.81805
PMEPA1	2.32702	9.22054				EME1	1.23919	3.81204
SMC1A	1.20756	9.21969				PARD3	1.19762	3.81181
NCK1-DT	1.14019	9.21811				CNTNAP1	1.34771	3.81128
HSP90AA2P	1.36379	9.21783				AC100793.3	1.34771	3.81128
NOC4L	1.13056	9.21185				SPDYA	1.62933	3.81036
USP1	1.14794	9.20898				PPP1CB	1.62933	3.81036
NEK6	1.37657	9.20798				HMGA1P4	1.10665	3.80909
RNF2	1.17721	9.20418				SPG11	1.70376	3.80808
ECE2	1.48934	9.19924				DLX2-DT	1.06103	3.80208
RRS1	1.29681	9.19862				IP6K1	1.3158	3.79867
SNAPC4	1.23398	9.19832				LINC01572	1.09135	3.79752
TMEM167A	1.00239	9.19793				LINC01170	1.05998	3.79619
TEDC1	1.42384	9.1976				AC016556.1	1.05998	3.79619
AAGAB	1.00774	9.19697				TRHR	1.54804	3.79361
UBXN11	1.16018	9.19692				STK38	1.11458	3.79173
AC012618.2	1.36444	9.19626				RFC4	1.84409	3.78931
AC005839.1	1.41207	9.19361				MAZ	1.98567	3.78287
AC010761.1	1.43886	9.19325				AC009133.5	1.98567	3.78287
RPP40	1.31654	9.19312				ERI3	1.10428	3.78278
PES1	1.04272	9.18987				CFD	1.43797	3.7825
TMEM260	1.10122	9.18823				FAM20C	1.60595	3.78034
NUP205	1.29071	9.18667				HES6	1.34545	3.77978
ABCF2	1.05097	9.18386				AC012485.1	1.34545	3.77978
SRPRB	1.02121	9.18046				SLC3A1	3.0996	3.77926
KDELR2	1.06931	9.18035				PAK6	1.37701	3.77642
LPCAT1	1.65195	9.17863				BUB1B-PAK6	1.37701	3.77642
DCP2	1.17293	9.1762				BUB1B	1.37701	3.77642
TNFRSF12A	1.87202	9.17387				AC002470.2	2.19747	3.77585
SGPL1	1.27354	9.17328				SIX6	1.32806	3.77565
GPR180	1.29195	9.17325				C14orf39	1.32806	3.77565
FGFR1OP	1.24388	9.17047				AL133482.1	1.23389	3.76879
RBM39	1.02283	9.1699				CLDN24	1.25819	3.76862
RPA3	1.07859	9.16945				CYP3A5	1.18688	3.76723
SRFBP1	1.07015	9.16808				SLC7A11	1.54257	3.76498
NME2	1.14678	9.16595				FOXH1	1.3908	3.76101
BCL7A	1.34029	9.16475				GTF2H3	1.64931	3.75696
HNRNPA1P16	1.57341	9.16465				AC117503.2	1.64931	3.75696
AC097263.1	1.44277	9.1631				TNNT2	1.62474	3.75597
RAB15	1.90432	9.1622				AC119427.2	1.62474	3.75597
TXLNG	1.21402	9.16214				FABP7	2.46813	3.75562
GPR35	2.0892	9.16188				PELI1	1.92156	3.75293
TM9SF4	1.06608	9.16131				TBC1D17	1.0088	3.7505
RUSC1-AS1	1.5863	9.15778				GRK1	1.11001	3.75037
TSEN2	1.18332	9.15608				PIWIL1	2.76441	3.74859
CD80	2.42251	9.15314				AC026412.1	2.32545	3.74697
PMS2P3	1.27731	9.15247				CCL28	1.17045	3.74684
MCTS2P	1.80659	9.15107				LINC02688	1.14679	3.74598
MTG2	1.17946	9.1507				SIX3	1.42824	3.7442
B3GALT6	1.16655	9.14859				BLZF1	1.09601	3.74214
RPS20P33	1.89212	9.15136				TACC3	1.44976	3.73726
FPGS	1.01899	9.14733				WDR77	1.3722	3.73673
AC103702.2	4.03382	9.14772				SSBP3	1.17626	3.73601
AC067931.1	1.93968	9.1491				PALB2	1.02261	3.73384
SPINT2	1.7031	9.1451				AC068533.4	1.55382	3.73279
AC243732.1	1.39467	9.14331				AL713852.1	1.54308	3.73263
SPRY4	1.51319	9.14201				MCM10	2.04913	3.73147
NUDT1	1.16421	9.14136				FAM199X	1.5285	3.73106
COL3A1	2.46305	9.14105				INTS14	1.19035	3.73012
AC026356.2	1.9638	9.13931				ERBIN	1.23713	3.72738
PGGHG	2.18012	9.13836				TMEM268	1.08141	3.72725
TET3	1.45487	9.13759				AC108860.2	1.32784	3.72705
WDR34	1.30662	9.13757				XPNPEP3	1.28171	3.72616
GAPDHP2	1.53787	9.13682				PPARG	1.27757	3.72221
NCEH1	1.71039	9.13653				RIPPLY3	1.30358	3.71549
EHMT2	1.16612	9.13467				TSPAN1	2.09725	3.7132
MICB	2.02174	9.12962				DPY19L1	1.20065	3.71312
CCNI2	2.54331	9.12872				SHANK2-AS2	1.80573	3.7127
FAM76B	1.10026	9.12642				IKBKG	1.23584	3.71155
SLC4A11	2.89634	9.1253				KCNE3	1.07962	3.71053
AC120114.3	1.6931	9.1235				AP001372.1	1.07962	3.71053
HSP90B2P	1.34912	9.12254				CD9	1.70607	3.70478
MCCC2	1.12862	9.12113				TAF15	1.51045	3.70335
EIF2S2P3	1.46995	9.11967				MRPL39	1.02239	3.70162
AL592295.1	1.32581	9.11661				TP53I11	1.07243	3.69649
IARS2	1.16485	9.11395				AC016168.4	1.23163	3.69598
IARS1	1.24718	9.11182				AC020916.1	1.17331	3.68932
HNRNPA3P9	1.90563	9.11264				TMEM270	1.7047	3.68538
DNAJC16	1.03358	9.11092				TMOD3	1.37567	3.68231
MEN1	1.14041	9.10995				AC008569.1	1.37611	3.68103
SYNCRIP	1.03376	9.10798				YRDC	1.3687	3.67924
MED14	1.20828	9.10657				OR4D2	1.70612	3.67826
HSPA9	1.07598	9.10657				AL590617.2	1.00284	3.67783
RBM15	1.11525	9.10565				SPATS2L	1.00538	3.67728
NOP14	1.11707	9.10396				AC012459.1	1.00538	3.67728
UBA2	1.09055	9.10175				SIGMAR1	1.74586	3.67498
HNRNPCP2	1.1574	9.10052				AP3M2	1.34911	3.67246
ZMYM1	1.27797	9.09683				RFC3	1.4327	3.67196
PXYLP1	1.50213	9.0957				MCM6	1.01964	3.66882
TCTE3	1.4846	9.09279				AP003100.1	1.19036	3.6672
SLC25A13	1.33719	9.09239				CNNM3	1.05504	3.66655
AC244093.4	2.09563	9.0943				ANKRD10-IT1	1.10919	3.66592
CALU	1.27667	9.09165				ITIH6	1.08809	3.66354
ZNF783	1.20886	9.08806				LINCMD1	1.05838	3.66285
TUBGCP4	1.04872	9.08731				ITGA2	1.31901	3.66229
MRE11	1.22868	9.08378				BAMBI	2.07236	3.65841
CBX3P9	1.62352	9.07797				PRR15	1.13893	3.65117
TRIM11	1.02954	9.07429				SAPCD1-AS1	1.20376	3.65016
ZNF12	1.07648	9.06995				TTC30B	1.13416	3.64782
CMSS1	1.18837	9.06995				AGPS	1.13416	3.64782
SP140L	1.2592	9.06993				DMTN	1.1582	3.64308
YARS2	1.02127	9.06842				TPMT	1.48158	3.64296
PVR	1.52395	9.06784				ALKBH2	1.37398	3.63792
PGM3	1.28943	9.06718				AC109642.1	1.33445	3.63609
AL390719.2	2.37742	9.06805				RPF2	1.02482	3.6287
AL390879.1	1.5843	9.06648				CD1E	1.08725	3.62745
MAP7	1.68339	9.06346				RPL12	1.13241	3.62686
MRPL15	1.06464	9.06246				GPR83	1.67748	3.62556
FAM86JP	1.46179	9.06227				TMC8	1.04629	3.62377
PPIAP19	1.58755	9.06201				TMC6	1.04629	3.62377
RAI14	1.46734	9.05973				C17orf99	1.04504	3.62185
HOXA11	5.20169	9.07996				COX19	1.3342	3.61895
ZRANB3	1.29764	9.05693				MFSD3	1.28042	3.61886
DEK	1.05972	9.05422				SP8	1.532	3.61497
CCT4	1.00224	9.0531				NSD2	1.10365	3.61483
GPRC5A	2.6585	9.04906				COG6	1.22646	3.61474
AP002807.1	1.69845	9.04743				DCAF11	1.00976	3.6139
AL035252.4	1.87818	9.04656				SLK	3.1555	3.61373
ELK4	1.15763	9.04649				AC114485.1	1.24801	3.6122
AC005261.3	1.0815	9.04572				MPZL2	1.79278	3.60548
ATP13A2	1.2267	9.04519				AL512363.1	1.27548	3.60385
DLL4	1.50686	9.04462				PIGO	1.10214	3.60236
HMGB1P6	1.98503	9.04436				C8orf31	1.04058	3.59897
AC087588.2	2.26794	9.04303				PIGA	1.05084	3.59887
AHCTF1	1.20647	9.04056				RHOD	2.15549	3.59549
AP2B1	1.22018	9.03878				ARSH	1.00383	3.5954
SRGAP2	1.22366	9.03806				HRAS	1.30001	3.59321
SLC39A1	1.09778	9.0362				AK5	1.48438	3.5932
UBE3D	1.16568	9.03606				C20orf187	1.15197	3.59265
PPP1R26-AS1	1.73587	9.03544				PPP1R15B	1.13564	3.59238
MTX1P1	1.54133	9.03192				AL606489.1	1.13564	3.59238
DPY19L4	1.2073	9.03092				AC008443.1	1.89724	3.59114
LMLN	1.30292	9.02859				STX16-NPEPL1	1.29836	3.5903
SEL1L3	1.64487	9.02469				STX16	1.29836	3.5903
BRAT1	1.15218	9.0246				ANKRD40CL	2.63741	3.58972
PGF	1.66682	9.02452				RTL10	1.52125	3.58843
TMC5	2.70827	9.02369				DNAJC5	1.20662	3.58832
CARNMT1	1.18099	9.02337				AL138778.1	1.15197	3.58446
AFG3L1P	1.1721	9.01957				ARHGAP11B	1.27693	3.58343
RPL22P12	1.71152	9.02206				AC091057.6	1.27693	3.58343
PDIA3P1	1.14352	9.01591				SLC1A1	1.1529	3.58176
ZNF623	1.15764	9.01543				CDKN2A	1.66184	3.57776
TIA1	1.26732	9.01377				CKAP2L	1.6121	3.5765
INTS13	1.2839	9.0103				BX640514.2	1.1803	3.57318
AP1G2	1.29926	9.00679				LIPC	1.18575	3.57269
IRAK1	1.30586	9.00414				PLEKHS1	1.7036	3.5726
ST14	1.89256	9.00289				HOXB9	1.31603	3.57
AC007128.1	4.52844	9.03448				HOXB7	1.31603	3.57
AC010319.4	1.26437	9.00349				TKFC	1.95832	3.5693
ARFGEF3	1.92725	9.00243				ZDHHC21	1.25391	3.56787
PDRG1	1.15349	9.00202				ALDH3A1	1.12297	3.56657
IER5L	1.85998	9.00198				CDS1	1.61197	3.56634
ADGRG1	1.74293	9.00194				RBM41	1.7225	3.56586
AL137186.2	1.17001	9.00157				SLC35B3	1.70456	3.56284
PRXL2B	1.38465	9.00057				AL929236.1	1.99283	3.56173
ZUP1	1.01248	9.00015				AL009181.1	2.08116	3.55655
PPIAP11	1.34035	8.99904				APBA1	1.89467	3.55337
SMYD3	1.03973	8.99854				AL353693.1	1.89467	3.55337
CBX4	1.32334	8.99699				EDNRA	1.19925	3.55165
C2CD3	1.17342	8.99687				DISC1-IT1	2.54589	3.55137
FNBP4	1.16438	8.9948				DISC1	2.54589	3.55137
HPDL	2.62762	8.99469				SLC17A4	1.47103	3.55118
ZRANB2	1.02928	8.99258				LPGAT1	1.1419	3.55003
MXD3	1.2329	8.99206				IL20	1.00453	3.54951
BIK	2.06328	8.99157				AC092604.1	1.2141	3.54847
CREBZF	1.26234	8.99081				CRYBG1	1.5064	3.54628
CUL4A	1.06431	8.98887				LGSN	2.20286	3.54414
THAP9-AS1	1.38844	8.98669				SLC51B	1.19795	3.54261
C10orf95	1.66489	8.98592				INPP5K	1.07716	3.53913
AC124798.1	2.22376	8.98437				SHMT1	1.45531	3.53853
MNX1-AS1	2.32944	8.98393				VILL	1.21844	3.53692
TRAF4	1.39172	8.98246				LINC01359	1.24219	3.53208
XPO4	1.35153	8.98183				JAK1	1.24219	3.53208
EPS8L3	3.12098	8.97809				AL157388.1	1.22989	3.52926
SCML1	1.73953	8.97758				FRMD5	1.27967	3.5275
SLC11A1	2.05567	8.97638				IL17REL	1.0538	3.52266
ZNF792	1.35504	8.97541				SOWAHB	1.82857	3.52076
REXO4	1.03517	8.9743				RAB2B	1.09318	3.5206
MMP25-AS1	1.69749	8.97415				AL135785.1	1.60777	3.51717
RRP1	1.14184	8.97353				AL133387.1	1.13406	3.51191
TAF1B	1.02824	8.97332				CCDC58	1.89412	3.50396
TPM3P8	1.71233	8.97172				SPACA4	1.67875	3.50242
AC109460.2	1.67767	8.97143				LINC02367	1.64788	3.50231
TUBGCP3	1.10743	8.97143				CSTB	3.51071	3.49976
PA2G4	1.07161	8.96904				NCKAP1	1.26306	3.49435
TOMM40	1.33311	8.96585				P4HA2	1.08271	3.49362
NLRC5	1.78164	8.9642				LARP4B	1.3071	3.4936
AC099568.2	1.99941	8.9651				TAS2R1	1.16332	3.493
SNRNP48	1.12075	8.96368				AC026787.1	1.16332	3.493
ZNF600	1.47181	8.96331				AC068647.2	3.47852	3.49178
UBD	3.4214	8.95823				ANKRD13C	1.08147	3.49058
KRT18P10	2.13899	8.95397				AL591503.1	1.10737	3.48795
ZFP69B	1.57971	8.95244				AL929602.1	1.60662	3.48211
TMEM185B	1.09597	8.94696				AL589182.3	1.60662	3.48211
DDAH1	1.3644	8.94623				PAGR1	1.76608	3.48157
PLSCR1	1.23401	8.94319				AC120114.4	1.76608	3.48157
MMP9	2.88151	8.94113				AC009133.6	1.76608	3.48157
SNORA65	1.40278	8.93946				AC009133.1	1.76608	3.48157
SLC1A5	1.71063	8.93737				SLC6A20	1.04968	3.47967
SULF1	2.80099	8.93628				GPR35	1.2329	3.47813
RBBP5	1.0262	8.93354				TTTY14	1.83208	3.47543
AHCY	1.24856	8.93344				YWHAE	1.63727	3.47448
TATDN2P2	1.55244	8.92496				BMP3	1.28457	3.47384
HNF4G	2.75547	8.92463				LINC01705	2.3022	3.47356
AL391832.2	1.89172	8.92405				STYK1	1.40011	3.46889
AZIN1	1.09412	8.92318				ZNF695	1.19137	3.46647
AP1AR	1.03283	8.92256				ZNF670-ZNF695	1.19137	3.46647
UNC93B1	1.45919	8.92138				STK38L	1.36529	3.46623
CST2	3.60791	8.92313				KRTAP9-1	1.00181	3.4654
PPIAP2	1.53501	8.91993				NNAT	1.04788	3.45756
NOL4L	1.44208	8.91951				DICER1	1.00567	3.45699
ESCO1	1.22646	8.9189				AL391557.1	1.05173	3.45474
HAPLN3	2.01638	8.91641				DDX6	1.09272	3.45372
TMEM132A	1.83479	8.91517				AC073254.1	1.22785	3.45355
NME2P1	1.72708	8.91436				MRO	1.19689	3.45319
POC1B	1.10396	8.9126				ERO1A	2.97359	3.44834
LINC01342	2.55848	8.91449				AL391056.1	1.61415	3.44579
GMCL1	1.03365	8.91059				AL590666.2	1.58596	3.44457
HOXC9	4.52102	8.91104				AC090844.3	1.07142	3.44326
VRK1	1.18736	8.90988				COASY	1.34792	3.44212
ANO9	1.99841	8.90824				FBRS	1.06413	3.4421
MYBBP1A	1.32252	8.90773				IL17RA	2.24143	3.43853
PPIAP42	1.64764	8.90753				CYP2C19	2.16777	3.43675
PGBD2	1.02433	8.90669				TBC1D9B	1.50933	3.43603
CD46	1.20774	8.90562				CDCA3	1.39257	3.43502
RBAK	1.19548	8.90492				NMU	3.14986	3.42647
PMM2	1.19771	8.90436				LINC02541	1.03445	3.42492
IQCB1	1.13061	8.90397				CERCAM	1.43149	3.42033
NXT2	1.36477	8.90296				ZNF180	1.22272	3.41864
CEP131	1.34868	8.90184				MLF2	1.15991	3.41848
PSMG1	1.18139	8.90126				KRT8P12	1.05229	3.41754
PARP9	1.3149	8.89982				AC103957.2	1.82875	3.41467
TYK2	1.00572	8.89901				LINC01366	1.13119	3.41463
POGLUT2	1.45703	8.89758				AL078604.2	1.03406	3.41342
UBE2SP2	1.81775	8.89704				GALNS	1.80096	3.40639
TUBB3	2.4924	8.89548				ACTG1P19	1.53306	3.40459
KRT18P38	2.09122	8.89497				MFSD14B	1.06628	3.40412
AL604028.2	1.69675	8.89395				POTEE	1.0338	3.4039
AL591895.1	1.66991	8.89237				GDF15	2.36648	3.40236
RAB22A	1.05432	8.89188				AL157997.1	1.34373	3.40074
UGGT2	1.18805	8.89151				LINC01618	1.15245	3.39984
NUP133	1.04494	8.89123				DANCR	1.15245	3.39984
GRB7	2.9046	8.88966				AC104066.4	1.15245	3.39984
INCENP	1.46726	8.88879				C8orf76	1.06662	3.39909
BCL2L12	1.31907	8.88713				HELT	1.27912	3.39598
LRRC45	1.35585	8.88575				LINC02465	1.60442	3.39332
KMT5C	1.29795	8.88553				GALNT7	1.44222	3.38784
SNORA33	1.75518	8.88448				OAZ3	1.41843	3.38609
PSMC3IP	1.23743	8.87492				ABHD3	1.04922	3.38606
TCP1	1.08562	8.87361				CAPN14	1.34062	3.38065
PDSS1	1.4388	8.87138				IL13RA1	1.23481	3.37412
GNPDA1	1.12087	8.86952				NREP-AS1	1.10478	3.37367
LBHD1	1.237	8.86851				AC018558.1	1.31762	3.37113
MSR1	2.34222	8.86737				AC024579.1	1.19707	3.36504
SLC44A1	1.08715	8.86575				CCNE2	1.41595	3.36435
PIK3CB	1.16255	8.86571				AC004938.2	1.40094	3.35991
TSFM	1.0319	8.86362				MFSD13A	1.71522	3.35832
WRAP53	1.0193	8.86094				HP1BP3	1.12943	3.35593
GTF3A	1.03698	8.85947				AC015910.1	1.72559	3.35178
FRMD8	1.21676	8.85941				COPS6	1.10672	3.3509
AC135048.4	1.6426	8.85856				DTL	1.04497	3.35059
SLC25A40	1.07487	8.85775				TCERG1	1.12601	3.34942
OAS3	1.84986	8.85649				PRR15L	1.16899	3.34718
CMTM7	1.68119	8.85584				CLTB	1.29726	3.34439
C2CD4A	3.50633	8.85369				MYBPH	1.12945	3.34425
NCOA6	1.11338	8.85175				AC007163.1	1.42624	3.33805
NSUN5	1.16565	8.84837				CSAG3	1.41642	3.33771
PRICKLE3	1.14638	8.84738				CSAG2	1.41642	3.33771
CD47	1.15261	8.84552				HIST2H3C	1.40855	3.33765
CCZ1B	1.19884	8.84398				HIST2H3A	1.40855	3.33765
HTRA4	2.90427	8.84261				C11orf24	1.09375	3.33742
NCBP1	1.10922	8.84332				ARHGEF38-IT1	1.33909	3.33507
AP003555.1	2.67911	8.84354				SSTR4	1.20939	3.33249
AC093157.1	1.2653	8.84057				AL049651.2	1.20939	3.33249
RCN1P2	1.74562	8.83825				FRG2B	1.06743	3.33117
TPR	1.16579	8.83813				FRG2	1.06743	3.33117
HNF1B	2.97394	8.83757				AL731769.2	1.06743	3.33117
PSRC1	1.67747	8.83619				AP000462.2	1.12988	3.32636
AC122688.3	1.74513	8.83587				NOL10	1.07668	3.32438
WDCP	1.11261	8.83536				NLK	1.09725	3.32126
THAP12	1.10784	8.8348				GAP43	1.75985	3.31785
ZSCAN16	1.00422	8.83457				AC016933.1	1.10745	3.31746
ANXA4	1.51183	8.83443				PLAT	1.26592	3.31577
AP000695.2	2.20317	8.83627				AC024560.4	2.1551	3.31539
AC004923.4	2.06224	8.8283				GGACT	1.35611	3.31233
KRT8P46	1.42481	8.82298				PERP	2.9124	3.31143
POLR3F	1.038	8.82287				SPAG9	1.32701	3.30603
TRMT13	1.00998	8.82195				ANP32D	1.04702	3.30602
PDIA4	1.38716	8.82123				DDR1	1.40223	3.30496
ALDH18A1	1.13451	8.81796				AL449043.1	1.21813	3.30312
PMS2P1	1.00627	8.8179				MND1	1.46569	3.30225
AC022211.4	1.99221	8.81742				CCR10	1.46942	3.30114
RRBP1	1.41172	8.81654				AC100793.2	1.46942	3.30114
PLXNA3	1.4847	8.81642				SLC10A5	1.82235	3.29958
AC097641.2	1.62797	8.81621				HSPB1	1.91686	3.29865
CHI3L1	3.12981	8.81271				HIST1H2AI	1.70819	3.29718
LPAR2	1.42927	8.81094				SETD5	1.21115	3.29635
YWHAG	1.0412	8.81057				NECAB1	1.18315	3.29578
GPR4	1.44092	8.80734				SLC5A12	1.01662	3.29308
TRPM2-AS	4.03517	8.80856				LINC00939	1.03625	3.29259
XPR1	1.20825	8.80478				HELZ2	1.06311	3.29128
RASSF7	1.66223	8.80228				EEF1E1-BLOC1S5	1.0435	3.28788
ZNF202	1.02107	8.80019				EEF1E1	1.0435	3.28788
HDAC1	1.02212	8.79636				FRK	1.78992	3.28758
CDCA4	1.32829	8.79503				ADGRA3	1.63228	3.28566
COX6B2	3.22704	8.79587				CNFN	3.92582	3.28353
STAG3L5P	1.70717	8.79213				LINC01606	1.04695	3.28341
AL731566.2	1.62465	8.7915				TRIP10	1.31076	3.28055
AC132938.6	1.82937	8.79391				CLCN3	1.58704	3.28046
DNAJA1	1.08527	8.78883				RGS4	1.34633	3.27794
WDR76	1.39441	8.78868				AL139398.1	1.97394	3.27639
ADRM1	1.03685	8.78864				AC007216.3	1.06257	3.27633
HSPE1P4	1.86506	8.7856				OR3A3	1.28874	3.2762
FANCG	1.25558	8.78412				AOC3	1.20623	3.27557
AC006330.1	1.92666	8.77882				NOL6	1.13318	3.27252
LINC00467	1.17504	8.77797				CENPQ	1.26546	3.27239
CHRNA5	1.74364	8.77573				PNPLA2	1.54433	3.2692
CEBPZ	1.00111	8.77377				ZNF34	1.30058	3.26872
MTFR1	1.08792	8.77241				AC133785.1	2.0115	3.26804
DOCK6	1.19412	8.77143				B4GALNT2	1.08989	3.26564
ERFE	2.47954	8.77136				IL24	1.47027	3.26188
AP001273.1	1.56952	8.7699				CEP95	1.09812	3.25479
RNF6	1.04759	8.76843				AQP10	1.40257	3.25412
RNF207	1.83835	8.7675				AP003352.1	1.1282	3.25398
KRTCAP3	2.0546	8.76576				TUBB4B	1.39421	3.25112
GPR19	1.91645	8.76406				NAV2-IT1	1.12053	3.24781
NCLN	1.13533	8.76334				NVL	1.75721	3.24741
OXTR	2.37788	8.76296				RAB27B	1.31414	3.24738
AC092115.2	1.33542	8.76262				MAGEA2B	5.87454	3.24601
ZBTB24	1.07532	8.75996				MAGEA2	5.87454	3.24601
CDK16	1.02643	8.75858				AP001107.4	1.17384	3.2455
SPICE1	1.17474	8.75737				IER3	1.32024	3.24443
ARRDC1	1.11799	8.75629				HCG20	1.32024	3.24443
SS18L1	1.21683	8.75604				BCAP29	1.17127	3.24375
ADAM17	1.19183	8.75453				CNPPD1	1.06201	3.2408
AL024508.1	2.27394	8.7544				TMEM212	1.37651	3.24069
LARP4	1.11191	8.75216				INPP5E	1.32099	3.23888
SENP1	1.05259	8.75209				CENPX	1.22889	3.23232
UHRF1BP1	1.21707	8.75094				TGFB1I1	1.2404	3.23203
DIS3	1.0501	8.75017				TNFSF4	2.19354	3.23126
LINC02604	1.82469	8.75012				LINC01182	1.30623	3.22955
SCAT2	2.15988	8.74952				PEMT	1.10231	3.22532
NEU3	1.25766	8.74722				AC020558.1	1.10231	3.22532
METTL7B	2.57313	8.74666				AC244258.1	1.94056	3.22516
GTF3C3	1.0084	8.74052				ABBA01000935.2	1.94056	3.22516
SH2B3	1.32109	8.73862				FXYD3	1.3255	3.21617
P3H4	1.75964	8.73691				AC020907.6	1.3255	3.21617
YEATS4	1.2632	8.73619				ACYP1	1.00393	3.21454
ANKRD13B	1.77005	8.73607				SLC18A1	1.50138	3.21321
RPS14P4	2.38571	8.74295				FGD6	1.15407	3.21179
SMG5	1.05041	8.73404				CAST	1.16647	3.21067
PLAUR	1.83435	8.73207				GSS	1.25866	3.20552
SNRPGP15	1.74919	8.73005				DACH2	1.0026	3.20309
IGF2BP3	3.92801	8.72995				AC090572.2	2.09749	3.2008
MARVELD2	1.54263	8.72962				DDX52	1.12996	3.19951
HMGA2	3.57572	8.72998				PIGR	1.98038	3.19321
AGTRAP	1.11365	8.7287				LYSMD3	1.06684	3.19252
AL035458.2	2.09215	8.72937				KIF9	1.23037	3.18706
HOXA13	5.08993	8.73256				NHS	1.2551	3.18659
CSTF2	1.17683	8.72629				BRCA1	1.63649	3.18649
ATAD3A	1.30437	8.72555				AC018362.2	1.42601	3.18564
AEN	1.29386	8.72173				MASTL	1.19488	3.18537
AL035461.3	1.74072	8.72168				ETNK1	1.10112	3.18488
ZNF343	1.07536	8.72054				SYNGR4	1.59027	3.1831
AC093788.1	1.93132	8.71562				AC010745.4	1.36787	3.18228
RPL39P36	1.604	8.7143				AC010745.2	1.36787	3.18228
MFSD10	1.07652	8.71195				OR3A4P	2.30073	3.18047
LMNTD2-AS1	2.44241	8.70795				OR3A2	2.30073	3.18047
SLC7A6	1.39978	8.70583				TINAG	1.29875	3.17939
AC048341.2	1.6482	8.70313				AC140912.1	1.20464	3.17762
KRT18P11	2.02953	8.70184				LINC02743	1.03513	3.17553
DCUN1D5	1.03347	8.70043				AL031717.1	1.1241	3.17383
HSPD1P4	1.5245	8.70034				USF1	1.00137	3.17074
RLIM	1.15293	8.7003				AL162595.1	1.02636	3.17061
P2RY6	1.90345	8.69997				LINC00350	1.45178	3.16598
KBTBD6	1.20421	8.69881				SEM1	1.78571	3.16582
CHST1	1.81372	8.69799				COL9A1	1.2024	3.16529
SARS2	1.05397	8.69706				SRP68	1.1581	3.1652
TNFRSF10A-AS1	1.54222	8.69669				NFRKB	1.19766	3.16287
KRTAP5-1	2.34202	8.69893				AC093523.1	1.16339	3.16094
COL1A2	2.28816	8.6958				AP002784.1	1.103	3.15828
MIR17HG	2.12044	8.69487				LYPD3	2.66912	3.15768
AC018653.3	1.7681	8.69199				CACNA1B	1.18142	3.15753
AC012360.3	1.48977	8.6909				CRYBB3	1.18824	3.15636
AC132192.2	1.73634	8.68615				LINC00589	1.11644	3.15617
CPOX	1.12747	8.68492				CCDC125	1.11098	3.15561
CEP76	1.20774	8.68413				AC084117.1	1.80321	3.15421
AC012676.5	1.74402	8.68299				CENPBD1	1.35314	3.15399
C12orf49	1.13648	8.68124				SPATA1	1.37602	3.1526
ABHD17C	1.64281	8.67854				SNHG1	1.51396	3.15249
NUP50	1.02989	8.67563				C2orf27B	1.07362	3.15204
PANO1	1.43504	8.67528				UGT8	1.54263	3.15016
ASCC3	1.2468	8.67513				AC109439.2	1.39245	3.15004
AL358232.1	2.75008	8.67885				AC092168.1	1.49782	3.14766
ASXL1	1.16203	8.67284				ADH6	2.76557	3.14368
RNF32	1.5962	8.67281				STAT6	1.53068	3.13903
NFYA	1.18085	8.67178				AC009908.1	2.33993	3.13416
RFC2	1.10581	8.66892				ZIC4	1.2431	3.13284
SPARC	1.886	8.66783				AL353743.2	2.11839	3.13221
POLB	1.06929	8.66417				ITGB1-DT	2.4721	3.1304
AC002128.2	2.01078	8.66307				KCNH6	1.00245	3.12943
FOXP4-AS1	2.29219	8.66001				THUMPD3-AS1	1.56903	3.12651
CTSC	1.38533	8.65791				TM4SF1	1.51144	3.1255
AC005822.1	1.36121	8.65705				RASSF8	1.14891	3.12424
SAMD12	1.68071	8.65627				KIF13B	1.19782	3.12301
FGD6	1.55027	8.65558				AC108449.1	1.19782	3.12301
FJX1	1.61741	8.65556				AC092614.1	1.06919	3.1221
PILRB	1.88852	8.65547				CCT5	1.18863	3.122
RAB11FIP4	1.43534	8.65278				AC093510.1	1.88278	3.12105
AC022144.1	2.53246	8.65254				FP325313.1	1.14622	3.12101
UPF3B	1.23295	8.65062				CAPN10-DT	2.11954	3.12055
OLFML2B	2.38894	8.64985				ZMYM4	1.10271	3.11999
PPIAP31	1.38578	8.64917				AURKB	1.09433	3.11735
AC005037.1	1.67627	8.65044				EIF2AK2	1.09393	3.11659
AC011465.1	2.24839	8.65287				SLC52A2	1.98525	3.11487
AASDHPPT	1.00046	8.648				FBXL6	1.98525	3.11487
AL118505.1	2.11	8.64537				ABCC2	2.23639	3.11414
SNHG17	1.37525	8.64166				PTGES3L-AARSD1	1.10247	3.11217
POLA2	1.16183	8.6407				PTGES3L	1.10247	3.11217
LRP11	1.17839	8.63753				COL15A1	1.04102	3.10862
MCM5	1.30458	8.63665				ANXA3	1.25774	3.10779
EVA1A	2.56996	8.63372				MSH4	1.66615	3.10674
ZMYND15	1.71308	8.63303				EVX1	1.02914	3.10612
LEMD1	3.22825	8.63448				ENPP7	1.43308	3.10362
AC132812.1	1.71948	8.6311				RSPH1	1.92338	3.10064
CDK12	1.3184	8.62963				EPHX1	1.01772	3.10057
ITGA2	1.89901	8.62954				AL591895.1	1.01772	3.10057
ACP6	1.15108	8.62939				TTTY23B	1.68733	3.09805
UBE2S	1.6186	8.62934				TTTY23	1.68733	3.09805
POLR3A	1.17421	8.62713				AC007349.3	1.14558	3.09764
AC015849.3	1.63261	8.62706				DTX2P1	1.09276	3.09628
AC093297.2	1.31685	8.62462				CDA	2.76916	3.09581
TBK1	1.01889	8.623				LINC01163	1.13316	3.08979
BEND3	1.38877	8.62235				ITLN2	1.21699	3.08491
STC2	2.16149	8.62175				AC106028.3	1.38084	3.08455
SFXN1	1.13051	8.6212				TPD52	1.43928	3.08385
NOC2L	1.20373	8.62099				CES2	2.55882	3.08375
BTBD16	2.82203	8.62217				IGSF23	1.41774	3.08312
SLC25A22	1.3717	8.61822				CEACAM22P	1.41774	3.08312
PDP1	1.33128	8.61596				AL132709.7	1.04873	3.07993
AL096828.3	2.26578	8.62383				LINC01979	1.60075	3.07975
PHTF1	1.15725	8.6147				LINC01978	1.60075	3.07975
STAG3L5P-PVRIG2P-PILRB	1.63163	8.61346				KRT75	1.08673	3.07952
HOOK1	1.95945	8.61327				AC055736.1	1.08673	3.07952
EMC1	1.07466	8.61184
SENP5	1.03591	8.6115
SBNO1	1.06923	8.609
KDM1A	1.08233	8.60878
AC106782.5	1.58168	8.60745
MHENCR	1.25119	8.6075
AC018695.4	1.86012	8.61079
RNASET2	1.13316	8.60368
METTL4	1.02728	8.60218
VOPP1	1.19581	8.60086
PRR5L	1.77089	8.59761
SEM1	1.13108	8.59446
HNRNPA1P4	1.42557	8.59127
AC107081.2	1.70289	8.59045
WASHC4	1.02587	8.58903
COL7A1	2.61574	8.58825
SMN1	1.17489	8.5868
OR2I1P	3.36103	8.58508
CERKL	1.47643	8.58439
TTPAL	1.21599	8.5833
EIF4HP2	1.78644	8.58342
AC021851.1	1.82988	8.5823
RPL7AP60	1.31041	8.57841
AC243960.2	1.44576	8.57904
AC097639.1	1.74536	8.57322
AL353807.4	2.14495	8.57626
PTMAP1	2.04114	8.57296
PSMG3	1.02143	8.57074
ZNF700	1.15138	8.56788
MSH6	1.15152	8.56652
SEMA5B	1.99309	8.56552
SLC39A6	1.22661	8.56535
NSF	1.03068	8.56376
GPR160	1.99588	8.56183
WDR77	1.02665	8.56127
MLKL	1.08291	8.56097
EFNA1	1.44326	8.55688
TBX19	1.30466	8.55622
ZNF224	1.2134	8.55529
CEP295	1.31288	8.55458
HNRNPA1P35	1.28739	8.55413
DCK	1.03226	8.55371
AC040162.1	1.15758	8.55368
CXCL8	3.41807	8.55239
PIGM	1.04716	8.54894
SHMT2	1.33904	8.54864
AC006042.1	2.11509	8.54866
STT3B	1.03664	8.54633
MAD1L1	1.0728	8.54426
STAT2	1.1541	8.54189
ZKSCAN2-DT	1.41166	8.54101
PRELID3B	1.17848	8.5407
[truncated: 3,974 more rows]
