# Supplementary material for: FOXA1/MND1/TKT axis regulates gastric cancer progression and oxaliplatin sensitivity via PI3K/AKT signaling pathway
Source: Cancer Cell Int. 2023 Oct 10;23:234. doi: 10.1186/s12935-023-03077-4 (PMC10566187; doi:10.1186/s12935-023-03077-4)
Supplement: Supplementary file 6 — Additional file 6: Table 5. Clinical information on 159 patients in THE TME chip. [file 12935_2023_3077_MOESM6_ESM.xls]

## Sheet: Table S3
Supplementary Table 5 Clinical information on 159 patients in THE TME chip
Sample_ID	MND1 expression（tumour）	staining intensity	Positive cell	score（staining intensity*Positive cell）	MND1 expression（para-carcinoma）	staining intensity	Positive cell	score（staining intensity*Positive cell）	Age	survival time(day）	EVENT(1=death；0=alive）	Tumor types	Tumor site	pathologic stages tumour	tumor size（cm）	tumor morphological	Nerve invasion	Vascular see tumor thrombus	T stage	Number of lymph node metastasis	N stage	Distant metastasis（M stage）	AJCC TNM Staging (8th Edition)
SC-0001	High	2	3	6	low	0	1	0	70	2147	1	adenomatous carcinoma	gastric body	Ⅲ	8	ulcerative type	NO	NO	T4b	0	N0	M0	ⅢA
SC-0002	High	1	2	2	low	1	1	1	59	2181	0	adenomatous carcinoma	gastric body	Ⅲ	2	ulcerative type	NO	NO	T2	0	N0	M0	ⅠB
SC-0003	High	2	3	6	low	1	1	1	54	802	0	adenomatous carcinoma	gastric body	Ⅱ-Ⅲ	0.8	ulcerative type	NO	NO	T4a	0	N0	M0	ⅡB
SC-0004	low	1	1	1	low	1	2	2	64	2166	0	adenomatous carcinoma	gastric antrum	Ⅱ	3.5	infiltrating type	NO	NO	T2	2	N1	1	Ⅳ
SC-0005	High	1	2	2	low	1	2	2	60	2166	0	adenomatous carcinoma	gastric antrum	Ⅲ	1.3	depressed lesions	NO	NO	T2	0	N0	M0	ⅠB
SC-0006	High	2	3	6	low	1	1	1	81	1330	1	adenomatous carcinoma	gastric antrum	Ⅲ	1.5	depressed lesions	NO	NO	T2	2	N1	M0	ⅡA
SC-0007	High	3	3	9	low	1	1	1	65	2002	0	adenomatous carcinoma	gastric antrum	Ⅱ	1.5	infiltrating type	NO	YES	T3	6	N2	M0	ⅢA
SC-0008	High	2	3	6	low	0	1	0	60	1083	1	adenomatous carcinoma	gastric body	Ⅱ	5.5	infiltrating type	YES	NO	T4a	3	N2	M0	ⅢA
SC-0009	High	2	2	4	low	1	2	2	89	204	1	adenomatous carcinoma	gastric antrum	Ⅲ	5	ulcerative type	NO	NO	T4a	5	N2	M0	ⅢA
SC-0010	High	1	1	1	low	1	2	2	60	732	1	adenomatous carcinoma	gastric antrum	Ⅲ	3	ulcerative type	NO	NO	T4a	9	N3a	M0	ⅢB
SC-0011	High	1	2	2	low	1	2	2	61	1141	1	adenomatous carcinoma	gastric body	Ⅲ	3	ulcerative type	NO	NO	T3	0	N0	M0	ⅡA
SC-0012	High	1	2	2	low	0	2	0	78	763	1	adenomatous carcinoma	gastric body	Ⅲ	0.5	Shallow flat surface	NO	NO	T1	1	N1	M0	ⅠB
SC-0013	High	3	1	3	low	1	3	3	84	625	1	adenomatous carcinoma	gastric cardia	Ⅱ-Ⅲ	5	infiltrating type	NO	NO	T4a	3	N2	M0	ⅢA
SC-0014	High	1	3	3	low	1	3	3	72	1988	0	adenomatous carcinoma	gastric antrum	Ⅱ	3	ulcerative type	YES	YES	T3	0	N0	M0	ⅡA
SC-0015	High	1	3	3	low	1	1	1	78	1987	0	adenomatous carcinoma	gastric antrum	Ⅲ	8.5	infiltrating type	YES	NO	T4a	11	N3a	M0	ⅢB
SC-0016	low	1	2	2	low	1	3	3	54	519	0	adenomatous carcinoma	gastric body	Ⅰ	10	infiltrating type	NO	NO	T2	0	N0	M0	ⅡB
SC-0017	High	2	4	8	high	1	4	4	61	2022	0	adenomatous carcinoma	gastric antrum	Ⅱ-Ⅲ	6	ulcerative type	YES	YES	T4a	15	N3a	M0	ⅢB
SC-0018	High	2	3	6	low	0	3	0	61	1980	0	adenomatous carcinoma	gastric antrum	Ⅰ	1.5	depressed lesions	NO	NO	T1	0	N0	M0	ⅠA
SC-0019	High	1	2	2	low	1	3	3	61	1580	1	adenomatous carcinoma	gastric cardia	Ⅱ-Ⅲ	8	ulcerative type	NO	NO	T4a	2	N1	M0	ⅢA
SC-0020	High	3	3	9	low	1	3	3	59	52	1	adenomatous carcinoma	gastric body	Ⅲ	7	infiltrating type	NO	NO	T4a	12	N3a	M0	ⅢB
SC-0021	High	2	2	4	high	2	2	4	67	1330	1	adenomatous carcinoma	gastric cardia	Ⅱ-Ⅲ	5	infiltrating type	NO	NO	T4b	2	N1	M0	ⅢB
SC-0022	High	2	2	4	low	3	1	3	68	1083	1	adenomatous carcinoma	gastric antrum	Ⅱ-Ⅲ	4	ulcerative type	NO	YES	T4a	12	N3a	M0	ⅢB
SC-0023	High	3	2	6	high	2	4	8	62	799	1	adenomatous carcinoma	gastric body	Ⅲ	3	infiltrating type	NO	NO	T4a	5	N2	M0	ⅢA
SC-0024	High	1	3	3	low	1	1	1	73	1967	0	adenomatous carcinoma	gastric body	Ⅲ	6	ulcerative type	NO	YES	T4a	17	N3b	M0	ⅢC
SC-0025	low	0	0	0	low	1	1	1	72	1333	0	adenomatous carcinoma	gastric body	Ⅲ	2.5	ulcerative type	NO	NO	T1	1	N1	M0	ⅢA
SC-0026	low	3	1	3	low	3	1	3	79	40	0	adenomatous carcinoma	gastric antrum	Ⅲ	3.5	ulcerative type	NO	YES	T2	0	N0	M0	ⅡB
SC-0027	High	0	3	0	low	3	1	3	72	107	1	adenomatous carcinoma	gastric antrum	Ⅲ	5	infiltrating type	YES	NO	T4a	9	N3a	M0	ⅢB
SC-0028	low	2	3	6	high	3	2	6	62	921	0	adenomatous carcinoma	gastric antrum	Ⅰ	5	ulcerative type	NO	NO	T2	6	N2	M0	ⅢA
SC-0029	low	2	2	4	low	2	1	2	47	613	0	adenomatous carcinoma	gastric antrum	Ⅱ	4.5	ulcerative type	YES	NO	T1	0	N0	M0	ⅡB
SC-0030	low	2	2	4	high	2	2	4	61	259	0	adenomatous carcinoma	gastric body	Ⅱ	3.5	infiltrating type	NO	NO	T1	0	N0	M0	ⅡB
SC-0031	High	1	3	3	low	2	1	2	76	2050	0	adenomatous carcinoma	gastric body	Ⅱ	5.5	ulcerative type	NO	NO	T4a	0	N0	M0	ⅡB
SC-0032	High	2	4	8	low	1	2	2	66	1945	0	adenomatous carcinoma	gastric body	Ⅱ	2.5	ulcerative type	NO	NO	T3	0	N0	M0	ⅡA
SC-0033	High	2	3	6	low	3	1	3	59	393	1	adenomatous carcinoma	gastric body	Ⅲ	3	infiltrating type	NO	NO	T3	0	N0	M0	ⅡA
SC-0034	High	2	4	8	high	2	2	4	56	189	1	adenomatous carcinoma	gastric antrum	Ⅲ	2	ulcerative type	YES	NO	T4a	4	N2	M0	ⅢA
SC-0035	low	1	4	4	low	1	1	1	63	287	0	adenomatous carcinoma	gastric body	Ⅰ	12	infiltrating type	NO	NO	T2	12	N3a	M0	ⅢC
SC-0036	High	3	1	3	low	3	1	3	38	1933	0	adenomatous carcinoma	gastric body	Ⅱ-Ⅲ	2	ulcerative type	NO	YES	T4a	6	N2	M0	ⅢA
SC-0037	High	2	3	6	high	2	3	6	66	210	1	adenomatous carcinoma	gastric body	Ⅱ-Ⅲ	6	ulcerative type	YES	YES	T4a	8	N3a	M0	ⅢB
SC-0038	High	2	2	4	low	3	1	3	63	824	1	adenomatous carcinoma	gastric body	Ⅱ-Ⅲ	4	ulcerative type	NO	NO	T4a	0	N0	M0	ⅡB
SC-0039	High	3	4	12	low	-	-	-	51	720	1	adenomatous carcinoma	gastric body	Ⅱ	1.5	ulcerative type	NO	NO	T4a	1	N1	M0	ⅢA
SC-0040	low	1	1	1	low	3	1	3	64	1826	0	adenomatous carcinoma	gastric body	Ⅱ	3.5	infiltrating type	NO	NO	T3	5	N2	M0	ⅢA
SC-0041	low	0	3	0	low	3	1	3	60	1260	0	adenomatous carcinoma	gastric body	Ⅲ	13	infiltrating type	NO	NO	T2	14	N3a	M0	ⅢC
SC-0042	high	1	3	3	low	3	1	3	66	1861	1	adenomatous carcinoma	gastric antrum	Ⅱ	2	ulcerative type	NO	NO	T2	0	N0	M0	ⅠB
SC-0043	high	1	3	3	low	2	1	2	60	1796	1	adenomatous carcinoma	gastric antrum	Ⅱ	2.5	ulcerative type	NO	NO	T4a	1	N1	M0	ⅢA
SC-0044	low	2	3	6	high	2	2	4	69	1629	1	adenomatous carcinoma	gastric antrum	Ⅲ	6.5	infiltrating type	NO	NO	T1	12	N3a	M0	ⅢB
SC-0045	low	1	2	2	low	2	1	2	69	381	0	adenomatous carcinoma	gastric antrum	Ⅱ	9	protrude type	NO	NO	T4a	0	N0	M0	ⅡB
SC-0046	high	1	1	1	low	3	1	3	66	1281	1	adenomatous carcinoma	gastric antrum	Ⅱ	3.5	ulcerative type	NO	NO	T3	0	N0	M0	ⅡA
SC-0047	high	1	3	3	low	2	1	2	88	95	1	adenomatous carcinoma	gastric antrum	Ⅲ	7.5	ulcerative type	NO	NO	T4a	2	N1	M0	ⅢA
SC-0048	high	3	4	12	low	2	1	2	63	1037	1	adenomatous carcinoma	gastric body	Ⅱ-Ⅲ	1	depressed lesions	NO	NO	T2	0	N0	M0	ⅠB
SC-0049	high	3	3	9	high	3	2	6	85	451	1	adenomatous carcinoma	gastric antrum	Ⅱ	7	ulcerative type	NO	NO	T4a	0	N0	M0	ⅡB
SC-0050	high	3	2	6	low	0	3	0	67	1025	1	adenomatous carcinoma	gastric antrum	Ⅱ-Ⅲ	3	ulcerative type	NO	NO	T4a	4	N2	M0	ⅢA
SC-0051	low	2	2	4	low	2	1	2	79	293	0	adenomatous carcinoma	gastric antrum	Ⅱ	3	ulcerative type	NO	NO	T3	3	N2	M0	ⅢA
SC-0052	high	0	2	0	high	3	2	6	67	226	1	adenomatous carcinoma	gastric body	Ⅲ	12	infiltrating type	YES	YES	T4b	15	N3a	M0	ⅢC
SC-0053	high	3	2	6	low	3	1	3	84	1464	1	adenomatous carcinoma	gastric antrum	Ⅱ	5	ulcerative type	NO	NO	T4a	0	N0	M0	ⅡB
SC-0054	low	1	3	3	high	3	3	9	55	1141	0	adenomatous carcinoma	gastric antrum	Ⅱ	4	ulcerative type	NO	NO	T2	1	N1	M0	ⅢA
SC-0055	high	2	1	2	high	2	2	4	50	1887	0	adenomatous carcinoma	gastric body	Ⅱ-Ⅲ	1.5	depressed lesions	NO	NO	T2	1	N1	M0	ⅡA
SC-0056	low	3	1	3	low	0	3	0	58	680	0	adenomatous carcinoma	gastric antrum	Ⅱ	0.5	depressed lesions	NO	NO	T2	0	N0	M0	ⅠB
SC-0057	low	2	3	6	low	0	3	0	64	897	0	adenomatous carcinoma	gastric body	Ⅱ	6	ulcerative type	NO	NO	T4a	17	N3b	M0	ⅢC
SC-0058	low	3	3	9	low	3	1	3	73	1247	0	adenomatous carcinoma	gastric antrum	Ⅰ	6	ulcerative type	NO	NO	T4a	4	N2	M0	ⅢB
SC-0059	high	2	2	4	high	2	2	4	87	232	1	adenomatous carcinoma	gastric body	Ⅱ-Ⅲ	6	ulcerative type	NO	NO	T4a	2	N1	M0	ⅢA
SC-0060	high	3	2	6	high	2	2	4	62	1190	1	adenomatous carcinoma	gastric antrum	Ⅱ	5	ulcerative type	NO	NO	T2	2	N1	M0	ⅢB
SC-0061	high	2	3	6	high	2	4	8	74	1504	1	adenomatous carcinoma	gastric antrum	Ⅱ-Ⅲ	3	ulcerative type	YES	NO	T4a	4	N2	M0	ⅢA
SC-0062	high	1	1	1	low	2	1	2	58	98	1	adenomatous carcinoma	gastric body	Ⅲ	10	infiltrating type	NO	NO	T4a	17	N3b	M0	ⅢC
SC-0063	low	2	2	4	low	2	1	2	65	1238	0	adenomatous carcinoma	gastric body	Ⅲ	4	infiltrating type	NO	YES	T2	4	N2	M0	ⅢA
SC-0064	high	3	3	9	low	2	1	2	81	1162	1	adenomatous carcinoma	gastric body	Ⅱ-Ⅲ	4	ulcerative type	NO	NO	T4a	3	N2	M0	ⅢA
SC-0065	high	3	4	12	low	3	1	3	67	153	1	adenomatous carcinoma	gastric body	Ⅲ	12	infiltrating type	YES	YES	T4a	17	N3b	M1	Ⅳ
SC-0066	high	3	2	6	low	3	1	3	63	1379	1	adenomatous carcinoma	gastric body	Ⅱ-Ⅲ	2	infiltrating type	YES	NO	T4b	0	N0	M0	ⅢA
SC-0067	high	3	2	6	low	3	1	3	58	1903	1	adenomatous carcinoma	gastric antrum	Ⅱ-Ⅲ	5	ulcerative type	NO	YES	T4a	2	N1	M0	ⅢA
SC-0068	high	3	2	6	low	3	1	3	63	1580	1	adenomatous carcinoma	gastric body	Ⅱ	4	ulcerative type	NO	NO	T4b	6	N2	M0	ⅢB
SC-0069	high	3	2	6	low	3	1	3	63	775	1	adenomatous carcinoma	gastric body	Ⅲ	5	ulcerative type	NO	NO	T4b	4	N2	M0	ⅢB
SC-0070	high	3	2	6	low	3	1	3	65	88	1	adenomatous carcinoma	gastric antrum	Ⅲ	12	ulcerative type	NO	YES	T4a	12	N3a	M0	ⅢB
SC-0071	low	0	1	0	high	2	3	6	59	40	0	adenomatous carcinoma	gastric body	Ⅲ	3.5	ulcerative type	NO	NO	T2	3	N2	M0	ⅢB
SC-0072	low	2	2	4	high	3	3	9	52	781	1	adenomatous carcinoma	gastric body	Ⅱ	8	infiltrating type	NO	NO	T3	1	N1	M0	ⅡB
SC-0073	high	2	3	6	low	2	1	2	73	1312	1	adenomatous carcinoma	gastric cardia	Ⅲ	4	infiltrating type	NO	NO	T4a	0	N0	M0	ⅡB
SC-0074	low	0	0	0	low	2	1	2	59	262	1	adenomatous carcinoma	gastric body	Ⅱ	4	infiltrating type	NO	NO	T2	17	N3b	M0	ⅢC
SC-0075	low	2	2	4	low	3	1	3	66	317	0	adenomatous carcinoma	gastric cardia	Ⅱ	3	infiltrating type	NO	NO	T2	17	N3b	M0	ⅢC
SC-0076	high	3	2	6	low	3	1	3	59	174	1	adenomatous carcinoma	gastric antrum	Ⅲ	10	infiltrating type	NO	NO	T4b	13	N3a	M0	ⅢC
SC-0077	low	3	3	9	low	3	1	3	61	1272	0	adenomatous carcinoma	gastric cardia	Ⅱ	15	infiltrating type	NO	NO	T2	12	N3a	M0	ⅢB
SC-0078	low	3	2	6	low	2	1	2	82	1665	1	adenomatous carcinoma	gastric antrum	Ⅲ	5	ulcerative type	NO	YES	T2	17	N3b	M0	ⅢC
SC-0079	high	3	2	6	low	3	1	3	66	1430	1	adenomatous carcinoma	gastric antrum	Ⅲ	2.5	infiltrating type	NO	NO	T4a	1	N1	M0	ⅢA
SC-0080	low	2	2	4	high	2	2	4	54	964	1	adenomatous carcinoma	gastric antrum	Ⅲ	11	infiltrating type	NO	NO	T4a	12	N3a	M1	Ⅳ
SC-0081	high	2	4	8	low	3	1	3	74	1817	0	adenomatous carcinoma	gastric antrum	Ⅱ	1.5	depressed lesions	NO	NO	T3	0	N0	M0	ⅡA
SC-0082	high	2	3	6	low	2	1	2	80	183	1	adenomatous carcinoma	gastric antrum	Ⅱ-Ⅲ	4	ulcerative type	NO	NO	T4b	1	N1	M0	ⅢB
SC-0083	low	2	1	2	low	3	1	3	66	1634	1	adenomatous carcinoma	gastric antrum	Ⅱ	2.5	ulcerative type	NO	NO	T2	0	N0	M0	ⅡA
SC-0084	high	3	4	12	low	3	1	3	65	1796	0	adenomatous carcinoma	gastric antrum	Ⅱ	7	ulcerative type	NO	NO	T4a	4	N2	M0	ⅢA
SC-0085	high	3	2	6	low	3	1	3	54	1792	1	adenomatous carcinoma	gastric antrum	Ⅱ	4	ulcerative type	NO	YES	T4b	15	N3a	M0	ⅢC
SC-0086	high	2	3	6	low	2	1	2	58	897	1	adenomatous carcinoma	gastric antrum	Ⅲ	11	infiltrating type	NO	NO	T3	17	N3b	M0	ⅢC
SC-0087	high	3	4	12	low	3	1	3	62	149	1	adenomatous carcinoma	gastric body	Ⅲ	2.5	infiltrating type	NO	NO	T4a	17	N3b	M0	ⅢC
SC-0088	high	3	3	9	high	3	2	6	60	531	1	adenomatous carcinoma	gastric cardia	Ⅱ	5	protrude type	NO	NO	T4b	2	N1	M0	ⅢB
SC-0089	low	2	2	4	high	2	2	4	72	1617	1	adenomatous carcinoma	gastric antrum	Ⅱ	3	protrude type	NO	YES	T2	0	N0	M0	ⅡA
SC-0090	high	2	2	4	low	1	2	2	70	689	1	adenomatous carcinoma	gastric antrum	Ⅱ-Ⅲ	1.5	ulcerative type	NO	NO	T3	1	N1	M0	ⅡB
SC-0091	high	3	2	6	low	1	2	2	83	128	1	adenomatous carcinoma	gastric body	Ⅱ	5	ulcerative type	NO	NO	T3	2	N1	M0	ⅡB
SC-0092	high	3	2	6	high	2	2	4	64	653	1	adenomatous carcinoma	gastric body	Ⅲ	4	ulcerative type	YES	NO	T4a	3	N2	M0	ⅢA
SC-0093	low	2	3	6	low	2	1	2	82	1881	0	adenomatous carcinoma	gastric antrum	Ⅱ	6	ulcerative type	NO	NO	T3	4	N2	M0	ⅢA
SC-0094	low	3	2	6	low	2	1	2	70	753	1	adenomatous carcinoma	gastric body	Ⅱ	5	ulcerative type	NO	YES	T4a	2	N1	M0	ⅢA
SC-0095	high	2	2	4	low	2	1	2	83	1730	0	adenomatous carcinoma	gastric cardia	Ⅲ	6	ulcerative type	YES	NO	T4a	0	N0	M0	ⅡB
SC-0096	high	3	4	12	high	2	3	6	58	433	1	adenomatous carcinoma	gastric antrum	Ⅲ	1.5	ulcerative type	NO	NO	T3	5	N2	M0	ⅢA
SC-0097	high	3	3	9	high	2	3	6	58	1726	0	adenomatous carcinoma	gastric antrum	Ⅱ	4	infiltrating type	NO	NO	T4a	3	N2	M0	ⅢA
SC-0098	high	2	4	8	low	2	1	2	75	1348	1	adenomatous carcinoma	gastric body	Ⅲ	2.5	ulcerative type	YES	NO	T4a	2	N1	M0	ⅢA
SC-0099	high	3	4	12	high	2	3	6	69	162	1	adenomatous carcinoma	gastric antrum	Ⅲ	3.5	ulcerative type	YES	NO	T4a	0	N0	M0	ⅡB
SC-0100	high	3	4	12	high	3	2	6	59	314	1	adenomatous carcinoma	gastric body	Ⅱ-Ⅲ	7	ulcerative type	YES	NO	T4b	5	N2	M0	ⅢB
SC-0101	high	3	4	12	low	3	1	3	82	1031	1	adenomatous carcinoma	gastric antrum	Ⅱ	6	ulcerative type	NO	NO	T4a	0	N0	M0	ⅡB
SC-0102	high	3	4	12	high	3	2	6	69	85	1	adenomatous carcinoma	gastric body	Ⅲ	15	infiltrating type	NO	NO	T4a	4	N2	M0	ⅢA
SC-0103	high	2	4	8	low	1	2	2	68	1694	0	adenomatous carcinoma	gastric body	Ⅱ	5	ulcerative type	NO	NO	T4a	0	N0	M0	ⅡB
SC-0104	high	2	4	8	low	1	3	3	68	805	1	adenomatous carcinoma	gastric body	Ⅲ	4	ulcerative type	NO	NO	T4a	4	N2	M0	ⅢA
SC-0105	high	3	3	9	low	1	3	3	62	1693	0	adenomatous carcinoma	gastric antrum	Ⅱ-Ⅲ	5	ulcerative type	NO	NO	T4a	10	N3a	M0	ⅢB
SC-0106	high	2	3	6	low	3	1	3	84	534	1	adenomatous carcinoma	gastric body	Ⅱ-Ⅲ	3.5	ulcerative type	NO	NO	T4a	6	N2	M0	ⅢA
SC-0107	high	3	4	12	low	1	3	3	63	1691	0	adenomatous carcinoma	gastric body	Ⅱ	9	ulcerative type	NO	NO	T4a	1	N1	M0	ⅢA
SC-0108	high	3	3	9	low	1	3	3	34	1202	1	adenomatous carcinoma	gastric body	Ⅲ	4	ulcerative type	NO	NO	T4a	7	N3a	M0	ⅢB
SC-0109	high	3	2	6	low	3	1	3	64	275	1	adenomatous carcinoma	gastric body	Ⅲ	6.5	ulcerative type	NO	NO	T4b	17	N3b	M1	Ⅳ
SC-0110	high	2	4	8	low	1	2	2	38	1683	0	adenomatous carcinoma	gastric body	Ⅲ	2	protrude type	NO	YES	T3	1	N1	M0	ⅡB
SC-0111	high	3	2	6	low	1	2	2	75	1022	1	adenomatous carcinoma	gastric body	Ⅱ	2	ulcerative type	YES	NO	T3	3	N2	M0	ⅢA
SC-0112	high	3	4	12	low	1	3	3	73	1680	0	adenomatous carcinoma	gastric body	Ⅱ-Ⅲ	9	ulcerative type	NO	NO	T4a	2	N1	M0	ⅢA
SC-0113	high	3	4	12	high	2	3	6	64	345	1	adenomatous carcinoma	gastric body	Ⅱ-Ⅲ	4	ulcerative type	YES	YES	T4a	17	N3b	M0	ⅢC
SC-0114	high	3	4	12	high	2	4	8	80	351	1	adenomatous carcinoma	gastric body	Ⅲ	3.5	ulcerative type	NO	YES	T4a	2	N1	M0	ⅢA
SC-0115	high	3	4	12	low	3	1	3	68	366	1	adenomatous carcinoma	gastric antrum	Ⅲ	5	ulcerative type	NO	NO	T4a	17	N3b	M0	ⅢC
SC-0116	high	2	4	8	low	2	1	2	70	763	1	adenomatous carcinoma	gastric antrum	Ⅲ	2	depressed lesions	NO	NO	T2	0	N0	M0	ⅠB
SC-0117	high	3	3	9	low	1	3	3	64	1650	0	adenomatous carcinoma	gastric body	Ⅱ-Ⅲ	10	infiltrating type	NO	NO	T4a	6	N2	M0	ⅢA
SC-0118	low	2	1	2	low	3	1	3	84	1881	1	adenomatous carcinoma	gastric body	Ⅱ	7	protrude type	NO	YES	T3	0	N0	M0	ⅡB
SC-0119	high	2	4	8	low	3	1	3	60	1648	0	adenomatous carcinoma	gastric body	Ⅱ	5	depressed lesions	NO	NO	T2	0	N0	M0	ⅠB
SC-0120	high	3	3	9	low	3	1	3	60	1028	1	adenomatous carcinoma	gastric body	Ⅲ	4.5	infiltrating type	NO	YES	T4a	17	N3b	M0	ⅢC
SC-0121	low	1	2	2	low	3	1	3	79	238	1	adenomatous carcinoma	gastric antrum	Ⅲ	5	ulcerative type	NO	NO	T3	2	N1	M0	ⅢA
SC-0122	low	3	2	6	low	3	1	3	64	705	1	adenomatous carcinoma	gastric body	Ⅲ	6	infiltrating type	NO	YES	T4a	17	N3b	M0	ⅢC
SC-0123	high	3	3	9	high	3	2	6	65	1636	0	adenomatous carcinoma	gastric cardia	Ⅱ	3.5	infiltrating type	NO	YES	T4a	2	N1	M0	ⅢA
SC-0124	high	3	3	9	low	1	3	2	78	787	1	adenomatous carcinoma	gastric body	Ⅱ	8	protrude type	NO	YES	T4a	4	N2	M0	ⅢA
SC-0125	low	1	2	2	high	2	3	6	68	1865	0	adenomatous carcinoma	gastric body	Ⅱ	5	ulcerative type	NO	NO	T1	4	N2	M0	ⅢA
SC-0126	high	2	4	8	low	1	3	3	77	1226	1	adenomatous carcinoma	gastric antrum	Ⅲ	4	infiltrating type	YES	NO	T4a	7	N3a	M0	ⅢB
SC-0127	low	2	2	4	high	3	2	6	74	1466	1	adenomatous carcinoma	gastric body	Ⅰ	1	depressed lesions	NO	NO	T2	0	N0	M0	ⅠB
SC-0128	high	3	3	9	low	3	1	3	80	1631	0	adenomatous carcinoma	gastric cardia	Ⅱ	3	infiltrating type	YES	NO	T4b	10	N3a	M0	ⅢC
SC-0129	high	3	4	12	low	1	3	3	57	326	1	adenomatous carcinoma	gastric antrum	Ⅲ	6	infiltrating type	NO	YES	T4a	10	N3a	M0	ⅢB
SC-0130	high	3	2	6	low	1	3	3	72	1622	0	adenomatous carcinoma	gastric body	Ⅱ	2	depressed lesions	NO	YES	T2	1	N1	M0	ⅡA
SC-0131	high	3	3	9	high	2	3	6	85	1104	1	adenomatous carcinoma	gastric body	Ⅱ	2.5	Shallow flat surface	NO	NO	T2	2	N1	M0	ⅡA
SC-0132	high	3	4	12	high	2	2	4	63	296	1	adenomatous carcinoma	gastric antrum	Ⅲ	5	ulcerative type	NO	NO	T4b	2	N1	M0	ⅢB
SC-0133	high	3	4	12	low	1	1	1	66	1616	0	adenomatous carcinoma	gastric antrum	Ⅲ	5	ulcerative type	NO	NO	T4a	0	N0	M0	ⅡB
SC-0134	high	3	4	12	high	3	2	6	74	378	1	adenomatous carcinoma	gastric antrum	Ⅲ	7.5	ulcerative type	YES	YES	T4a	6	N2	M0	ⅢA
SC-0135	high	3	3	9	low	3	1	3	74	1098	1	adenomatous carcinoma	gastric antrum	Ⅲ	5.5	ulcerative type	NO	YES	T4a	17	N3b	M0	ⅢC
SC-0136	high	3	4	12	low	1	3	3	68	1565	1	adenomatous carcinoma	gastric antrum	Ⅲ	3.5	infiltrating type	YES	NO	T4a	0	N0	M0	ⅡB
SC-0137	high	3	3	9	low	1	3	3	84	1582	0	adenomatous carcinoma	gastric antrum	Ⅱ	4.5	infiltrating type	NO	NO	T4b	1	N1	M0	ⅢB
SC-0138	high	3	3	9	low	1	3	3	57	482	1	adenomatous carcinoma	gastric antrum	Ⅱ	3	ulcerative type	YES	YES	T4a	8	N3a	M0	ⅢB
SC-0139	high	2	4	8	low	1	2	2	75	1564	0	adenomatous carcinoma	gastric body	Ⅱ-Ⅲ	2.5	infiltrating type	YES	NO	T4a	6	N2	M0	ⅢA
SC-0140	high	2	4	8	low	1	3	3	56	262	1	adenomatous carcinoma	gastric antrum	Ⅱ	6	ulcerative type	NO	NO	T4b	11	N3a	M0	ⅢC
SC-0141	high	3	2	6	low	3	1	3	73	1525	1	adenomatous carcinoma	gastric antrum	Ⅱ	1.5	Shallow flat surface	NO	NO	T2	0	N0	M0	ⅠB
SC-0142	high	3	3	9	low	1	2	2	73	1469	0	adenomatous carcinoma	gastric cardia	Ⅱ	6.5	ulcerative type	NO	YES	T4b	10	N3a	M0	ⅢC
SC-0143	low	2	1	2	low	1	1	1	61	1010	0	adenomatous carcinoma	gastric cardia	Ⅱ	4.5	infiltrating type	NO	NO	T2	0	N0	M0	ⅡB
SC-0144	high	2	4	8	low	1	1	1	54	991	1	adenomatous carcinoma	gastric body	Ⅱ	8	infiltrating type	YES	NO	T4b	15	N3a	M0	ⅢC
SC-0145	high	2	3	6	low	1	2	2	66	1531	0	adenomatous carcinoma	gastric body	Ⅲ	6	infiltrating type	NO	YES	T4a	6	N2	M0	ⅢA
SC-0146	high	2	4	8	low	1	3	3	52	528	1	adenomatous carcinoma	gastric body	Ⅱ-Ⅲ	7.5	ulcerative type	NO	YES	T4a	14	N3a	M0	ⅢB
SC-0147	high	2	4	8	high	2	3	6	71	1524	0	adenomatous carcinoma	gastric body	Ⅱ	0.2	Shallow flat surface	NO	NO	T2	0	N0	M0	ⅠB
SC-0148	high	3	3	9	low	1	2	2	72	1522	0	adenomatous carcinoma	gastric body	Ⅲ	8	ulcerative type	NO	NO	T4a	8	N3a	M0	ⅢB
SC-0149	high	3	4	12	high	3	2	6	58	110	1	adenomatous carcinoma	gastric body	Ⅱ	2	ulcerative type	YES	NO	T4a	7	N3a	M0	ⅢB
SC-0150	high	3	3	9	low	3	1	3	58	1595	0	adenomatous carcinoma	gastric antrum	Ⅱ	3	ulcerative type	NO	NO	T2	0	N0	M0	ⅠB
SC-0151	high	3	4	12	low	1	3	3	60	1515	0	adenomatous carcinoma	gastric body	Ⅱ-Ⅲ	8	infiltrating type	YES	YES	T4b	17	N3b	M0	ⅢC
SC-0152	high	3	4	12	high	2	2	4	53	1509	0	adenomatous carcinoma	gastric cardia	Ⅱ-Ⅲ	6	ulcerative type	NO	YES	T4b	14	N3a	M0	ⅢC
SC-0153	high	3	3	9	low	1	3	3	67	381	1	adenomatous carcinoma	gastric body	Ⅱ	3.5	ulcerative type	NO	NO	T4b	7	N3a	M1	Ⅳ
SC-0154	high	2	4	8	low	1	2	2	80	1272	1	adenomatous carcinoma	gastric cardia	Ⅲ	2.5	infiltrating type	YES	NO	T4a	2	N1	M0	ⅢA
SC-0155	high	3	2	6	low	1	3	3	57	1501	0	adenomatous carcinoma	gastric body	Ⅱ-Ⅲ	7	infiltrating type	NO	NO	T4a	0	N0	M0	ⅡB
SC-0156	high	3	2	6	low	2	1	2	73	1690	0	adenomatous carcinoma	gastric body	Ⅱ	2.5	Shallow flat surface	NO	NO	T1	0	N0	M0	ⅠA
SC-0157	high	2	4	8	low	1	2	2	81	445	1	adenomatous carcinoma	gastric antrum	Ⅲ	9	infiltrating type	YES	NO	T4a	11	N3a	M0	ⅢB
SC-0158	high	2	3	6	low	3	1	3	59	1490	0	adenomatous carcinoma	gastric body	Ⅲ	6	ulcerative type	YES	NO	T4a	2	N1	M0	ⅢA
SC-0159	low	2	1	2	low	1	1	1	79	1490	0	adenomatous carcinoma	gastric body	Ⅰ	2	Shallow flat surface	NO	NO	T1	0	N0	M0	ⅠA
