# Supplementary material for: FOXA1/MND1/TKT axis regulates gastric cancer progression and oxaliplatin sensitivity via PI3K/AKT signaling pathway
Source: Cancer Cell Int. 2023 Oct 10;23:234. doi: 10.1186/s12935-023-03077-4 (PMC10566187; doi:10.1186/s12935-023-03077-4)
Supplement: Supplementary file 9 — Additional file 9: Table 8. HTFtarget database and PROMO database intersection results. [file 12935_2023_3077_MOESM9_ESM.xls]

## Sheet: Sheet1
Supplementary Table 8 HTFtarget database and PROMO database intersection result
hTFtarget	PROMO
CTCF	C/EBP beta
BATF	GR-alpha
BCL6	GR-beta
BRD3	GATA-1
BRD4	TF2
CBFB	FOXP3
CDK7	IRF-2
CDK9	ER-alpha
CEBPA	YY1
CREB1	ap-2ALPHAA
CTCF	TFⅡD
E2F1	c-Myb
E2F4	HNF-3alpha
EGR1	TCF-4E
ELF1	Pax-5
EP300	GCF
ERG	WT1
ETS1	XBP-1
FLI1	HNF-1A
GABPA	P53
GATA1	GR
GATA2	HOXD9
GATA3	HOXD10
GATA3	ENKTF-1
HDAC1	FOXA1
HDAC2
IRF3
IRF4
MAFK
MAX
MAZ
MED1
MYB
MYC
MYH11
NCOR1
NCOR2
NFIC
NFYB
PAX5
POLR2A
POU2F1
RAD21
RUNX1
RUNX3
RXRA
SIN3A
SP1
SPI1
SRF
STAG1
STAT1
STAT4
STAT5B
TAF1
TAL1
TCF12
TCF3
TP53
YY1
BRD4
ETS1
MED1
NOTCH1
RBPJ
RUNX1
E2F1
MYC
BHLHE40
CEBPA
CEBPD
CTCF
CTCFL
E2F4
E2F6
EGR1
EP300
ETS1
FOS
FOSL1
GABPA
GATA1
GATA2
GTF3C2
HCFC1
HDAC1
HEY1
IRF1
JUN
JUND
KDM5B
KMT2A
MAX
MAZ
MYC
NFYA
NFYB
NR2F2
PBX1
PHF8
PML
POLR2A
RAD21
RBBP5
RCOR1
RUNX1
SAP30
SMAD1
SMC3
SPI1
TAF1
TAL1
TBP
TCF3
TEAD4
TRIM28
UBTF
YY1
ZBTB7A
ZNF143
ZNF263
BRD4
CTCF
EP300
GATA3
JUND
MAX
MYC
POLR2A
RAD21
REST
SIN3A
SMC3
SPI1
TAF1
YY1
BRCA1
BRD4
CTCF
E2F1
E2F4
EGR1
ELF1
EP300
FOS
FOXA1
GATA3
HIF1A
JUN
KDM5B
KLF4
MAX
MED1
MYC
NR2F2
POLR2A
RAD21
SIN3A
SPI1
SRC
STAG1
STAT3
TFAP2C
CTCF
E2F1
CTCF
CTCF
CTCF
E2F1
E2F4
EP300
GTF3C2
JMJD6
MAX
MAZ
POLR2A
RAD21
SFMBT1
SMC3
STAT1
TAF1
CDK8
CDK9
CTCF
E2F3
E2F7
EGR1
FOSL1
FOXD2
FOXO3
JUND
KLF5
MED12
MYC
POLR2A
RAD21
SMC1A
SMC3
SP1
TAF3
YY1
ZBTB33
CTCF
JUN
JUND
FOXA2
CTCF
BCOR
CTCF
E2F6
EGR1
EP300
FOXA2
FOXP1
GATA4
HDAC2
JUND
MAX
POLR2A
POU5F1
RAD21
RBBP5
REST
SIN3A
SMAD1
SMAD4
SP1
SP4
SPI1
SRF
TAF1
TAF7
TBP
TP53
YY1
ZNF143
CTCF
CTCF
E2F4
GTF2I
SPI1
ETV1
CTCF
CTCF
SPI1
ERG
JUN
BRD4
CTCF
SPI1
CTCF
AR
BRD2
CDK9
CTCF
EP300
JMJD6
MYC
NCOR1
PHF8
POLR2A
RNF2
SPI1
SUMO2
TBL1X
ZNF263
CREB1
CTCF
ELF1
FOXA2
GABPA
MAFK
MAX
MAZ
MXI1
POLR2A
RAD21
REST
SIN3A
STAG1
SUZ12
TAF1
TAL1
TBP
YY1
ZBTB7A
CHD1
CTCF
E2F6
E2F7
EP300
ETS1
FOXA2
GABPA
LMNB1
MAX
MAZ
MYC
NKX2-1
POLR2A
RAD21
RB1
RBL2
RELA
REST
SIN3A
SMAD3
SP1
SPI1
SUMO1
SUMO2
TAF1
YY1
CTCF
BRD4
CTCF
E2F1
GATA2
GATA3
NOTCH1
POLR2A
ELF1
EP300
FLI1
GABPA
WDR5
CTCF
SPI1
BRD4
CTCF
KDM4C
BRD4
CBFB
CTCF
DDX5
DUX4
GATA1
HDAC1
HNF4A
KAT5
KLF9
MYH11
POLR2A
SPI1
STAT1
CTCF
POLR2A
SIN3A
STAG1
FOXA1
KLF4
KLF5
SPI1
GATA1
SPI1
CBFB
MAZ
AR
CBX8
CTCF
ERG
FOXA1
FOXP1
HDAC1
HDAC2
MRE11A
CTCF
EP300
SPI1
SPI1
BRD4
CTCF
CTCF
E2F4
CTCF
FOXA2
GATA4
SPI1
TFAP2C
CTCF
SPI1
CTCF
GATA4
GATA6
KLF5
SPI1
SPI1
TP63
BCL6
BCOR
NCOR2
SPI1
CREB1
CTCF
EGR1
MAX
POLR2A
RAD21
TAF1
TEAD4
YY1
ZBTB7A
CTCF
ETS1
FLI1
FOS
GATA2
EWSR1
JUN
POLR2A
