# Supplementary material for: FOXA1/MND1/TKT axis regulates gastric cancer progression and oxaliplatin sensitivity via PI3K/AKT signaling pathway
Source: Cancer Cell Int. 2023 Oct 10;23:234. doi: 10.1186/s12935-023-03077-4 (PMC10566187; doi:10.1186/s12935-023-03077-4)
Supplement: Supplementary file 10 — Additional file 10: Table 9. Mass spectrometry and Flg-MND1 mass spectrum results. [file 12935_2023_3077_MOESM10_ESM.xls]

## Sheet: Sheet1
Supplementary Table 9 Mass spectrometry and Flg - MND1 mass spectrum results.
Mass spectrometry	Flg - MND1 mass spectrum
K2C1	CPNE3
HS90A	PPL
K1C10	ATAD3B
VIME	DCUN1D2
HSP7C	TMEM200B
K22E	ALG13
EF2	FAM213B
LMNA	RPL38
K1C9	RPSA
ENOA	RPS13
CH60	S100A14
KPYM	PSMA6
BIP	FBXO41
TBB5	YWHAZ
HS90B	RPS25
ACTB	HMGN2
ATPA	AZU1
TBA1B	RPS10
NUCL	AZGP1
LPPRC	POF1B
PDIA4	DSC3
HNRPU	S100A9
SERPH	PHTF1
VINC	MNDA
ENPL	BLMH
EF1A1	PLEKHH3
C1TC	CPA4
K2C5	HSPA5
PDIA3	PDE7B
GRP75	RPS3
PABP1	CFL1
TERA	TUBA1B
ACLY	TKT
FLNA	ECM1
RACK1	PKM
ACTN4	GSN
PGK1	ANXA3
XRCC5	HSPA7
XRCC6	TPM3
ANXA2	TGM3
G3P	SERPINB1
FSCN1	CAT
G6PI	ENO1
DDX5	RPL13
ROA1	HSPA8
A0A7I2YQN2	SERPINB3
IMB1	MYH9
ATPB	PIP
LDHB	LGALS7
K1C14	HIST1H3A
MDHM	ALDOA
ALDOA	ANXA1
HSP74	NCCRP1
K2C6A	TGM1
EF1G	ABCE1
RSSA	IGHG2
PUR6	SHMT2
SERA	DMKN
CALX	PKP1
TCPQ	ANXA2
PDIA1	UBC
H4	RPL28
IF4A1	PARL
TCPG	CDSN
TPIS	FLG2
HNRPK	PRDX2
CLH1	CASP14
RL6	S100A7
TCPD	LYZ
ANXA1	ARG1
GLYM	FAU
HNRPC	VIM
FKBP4	RPL26
MATR3	KPRP
KCRB	TXN
ILF3	RPS19
HNRPL	EEF1A1
PDIA6	CTSG
TCPB	PRDX1
HNRH1	SERPINB12
RLA0	HIST1H4A
PAIRB	MPO
GANAB	FLG
ROA2	ELA2
HSPB1	GAPDH
DX39B	HIST1H2AC
SYRC	FABP5
SYTC	CSTA
HNRPD	SBSN
HMGB1	DCD
ANXA6	JUP
SND1	DSC1
STIP1	RCOR1
EFTU	CALML5
SFPQ	DSG1
UBA1	S100A8
PTBP1	ERICH3
RAN	LTF
TKT	ACTB
TCPA	ALB
RL4	IGKC
CISY	DSP
TCPZ	IGHG1
HNRPM	HRNR
LDHA
PARP1
H2B1J
PPIA
LMNB1
TCPH
YBOX1
RS3
H13
HS71A
DDX3X
AN32B
PCBP1
IMDH2
CALR
SERC
SAHH
RL18
RS8
EZRI
SYVC
HYOU1
RS4X
DHX9
PGAM1
PHB2
RBMX
DDX21
PRDX1
A0A0U1RR32
COF1
K2C6A
PUR2
PSMD2
PUR9
RL7
H2A2C
6PGD
PROF1
HS105
SYEP
TCPE
SSRP1
UBP14
HORN
ILF2
LMNB2
1433G
IGHG1
TRAP1
CAP1
TFR1
GDIB
RUVB1
PUR4
H0Y8C6
RL7A
TBB2B
SYAC
ADT2
RL5
H31
LRC59
Q32Q12
NPM
NP1L1
H15
UBB
RS9
RS3A
GARS
FAS
SYLC
VDAC2
EIF3A
PA2G4
D6R9P3
SYIC
RS2
PRDX6
FUBP1
EIFCL
RBBP4
RS5
PCBP2
ELAV1
ANXA5
4F2
HNRPR
RL14
PYRG1
NACAM
MCM3
SRSF1
S10A8
RL3
RL27A
FUMH
TOP2B
SF3B1
MCM6
CKAP4
RPN1
RL31
PSD11
GSTP1
ASSY
RL26
TPM4
IF4G1
AN32A
DCD
SAFB1
CAND1
IF4A3
XPO2
XPO1
E7EX29
RS6
RINI
G6PD
H0YNE9
A0A7I2V535
RL28
PCNA
IF2G
DREB
RS23
AATM
CYBP
RL11
FILA2
KINH
TNPO1
RL8
RS25
MSH2
1433E
ATAD2
FUBP2
J3KQ32
PABP4
TBB4B
CLIC1
DDX17
H2B1K
DLDH
MCM2
RL12
S10A9
LMAN1
RUVB2
RADI
RL18A
P5CS
PSA
TXND5
EIF3B
FUS
1433T
ALBU
KPRP
RS14
RS16
SRSF8
RL13
OST48
IPO7
PABP2
E9PR30
RL13A
IF5A1
RL21
KV401
SCOT1
PIP
SDHA
ROA3
TIF1B
SPR2E
NPM
HBA
A0A075B6Z2
SEPT8
AHNK
SYWC
RIR1
LYSC
PRS6A
IF5
RL22
NASP
RS13
UGDH
PPIB
RSMB
DDX1
DPYL2
RS11
SYK
RL30
RL19
PSA6
DJB11
H7BY10
ERF1
FEN1
IMA8
RL24
RS18
RL10A
VDAC1
RL29
A0A087WWU8
A0A5K1VW95
GSHR
DHX15
SBP1
DX39A
MCM7
